# Supplementary material for: Molecular codes and in vitro generation of hypocretin and melanin concentrating hormone neurons
Source: PubMed Central journal article supplement — Proc Natl Acad Sci U S A. 2019 Aug 2;116(34):17061–70. doi: 10.1073/pnas.1902148116 (PMC6708384; doi:10.1073/pnas.1902148116), 2019-08-02
Supplement: pnas.1902148116.sapp.pdf [file pnas.1902148116.sapp.pdf]

Supplementary Information for

**Molecular codes defining lateral hypothalamic sleep regulating neurons**

Ali Seifinejad<sup>a,b,1</sup>, Sha Li<sup>a</sup>, Cyril Mikhail<sup>b</sup>, Anne Vassalli<sup>a</sup>, Sylvain Pradervand<sup>c</sup>, Yoan Arribat<sup>a</sup>, Hassan Pezeshgi Modarres<sup>d</sup>, Bridget Allen<sup>e</sup>, Rosalind M. John<sup>e</sup>, Francesca Amati<sup>a</sup> and Mehdi Tafti<sup>a,1</sup>

<sup>a</sup>Department of Physiology, Faculty of Biology and Medicine, University of Lausanne, 1005 Lausanne, Switzerland; <sup>b</sup>Center for Integrative Genomics, Faculty of Biology and Medicine, University of Lausanne, 1015 Lausanne, Switzerland; <sup>c</sup>Genomic Technologies Facility, Faculty of Biology and Medicine, University of Lausanne, 1015 Lausanne, Switzerland; <sup>d</sup>Institute of Bioengineering, School of Life Sciences, Ecole Polytechnique Fédérale de Lausanne, 1015 Lausanne, Switzerland; and <sup>e</sup>Biomedicine Division, Cardiff School of Biosciences, Cardiff University, CF10 3AX Cardiff, United Kingdom

<sup>1</sup>To whom correspondence may be addressed. Email: [Ali.Seifinejad@unil.ch](mailto:Ali.Seifinejad@unil.ch) or [Mehdi.Tafti@unil.ch](mailto:Mehdi.Tafti@unil.ch).

**This PDF file includes:**

Supplementary text

Figs. S1 to S7

Tables S1 to S7

References

## Supplementary Information Text

**RNA sequencing analysis:** Cluster generation was performed with the libraries using the Illumina TruSeq SR Cluster Kit v4 reagents and sequenced on the Illumina HiSeq 2500 using TruSeq SBS Kit v4 reagents. Sequencing data were processed using the Illumina Pipeline Software version 1.84. Purity-filtered reads were adapter- and quality-trimmed with Cutadapt (v. 1.8,(1)). Reads matching to ribosomal RNA sequences were removed with fastq screen (v. 0.9.3). Remaining reads were further filtered for low complexity with reaper (v. 15-065, (2)). Reads were aligned against *Mus musculus*.GRCm38.86 genome using STAR (v. 2.5.2b, (3)). The number of read counts per gene locus was summarized with htseq-count (v. 0.6.1, (4)) using *Mus musculus*.GRCm38.86 gene annotation. Quality of the RNA-seq data alignment was assessed using RSeQC (v. 2.3.7, (5)). Statistical analysis was performed in R (version 3.4.1). Genes with low counts were filtered out according to the rule of 1 count per million (cpm) in at least 1 sample. Library sizes were scaled using TMM normalization and log-transformed into counts per million (CPM) (EdgeR package version 3.18.1; (6)). Differential expression was computed with limma (7).

**qPCR and RT-PCR:** Quantitative-Real Time PCR for the analysis of gene expression was carried out by real time qPCR in an ABI prism HT7900 detection system (in triplicate). Samples were collected and preserved at  $-80^{\circ}\text{C}$  until RNA extraction. Total RNA was isolated using the RNeasy Micro kit (QIAGEN 74004) or Trizol extraction method. Integrity and quality of RNA samples was checked using a Nanodrop (ND- 1000) spectrophotometer and RNA 2100 Bioanalyzer (Agilent). Reverse transcription was carried out based on Promega reverse transcription Kit by random hexamer or oligo-dT

primers according to the manufacturer's instructions. Amplification was carried out with TaqMan assay kit.

**Cell culture:** For primary neuronal cultures and neurosphere formation for HCRT and MCH cell sorting, E18 pregnant mice were sacrificed and embryos were removed and decapitated in PBS (Thermofisher) on ice. E18 embryonic hypothalami were dissected and cut into small pieces in a dissection solution containing HEPES buffer. After enzymatic digestion for 30 min with 10 U/ml papain (Roche 108014, Roche, Indianapolis, IN), cells were dissociated by 12 to 15 trituration using a 1000 $\mu$ l pipette tip in neurosphere medium which contains DMEM/F12+ glutamax, sodium pyruvate 1%, non-essential amino acids 1% and penicillin/ streptomycin 1%. Isolated cells were centrifuged for 4 minutes at 800 RPM and suspended in neurosphere medium. After addition of appropriate virus (lentivirus particles for MCH and AAV for HCRT cell sorting at MOI=10), cells were seeded in low adherent 96 wells in 80 $\mu$ l neurosphere medium. The same medium containing bFGF (10ng/ml) was added to the neurospheres 24h later. After one week in this medium the cells were dissociated for cell sorting.

Embryonic mouse fibroblasts were prepared from E12.5 day old embryos after removing the head and internal organs. The rest of the body was divided into small pieces and dissociated by passing through a gauge 18 needle for several times. After dissociation, cells were cultured in tissue culture flasks in DMEM medium containing FBS 10%, L-glutamine 1%, penicillin/streptomycin 1% and non-essential amino acids 1%. Establishment of mouse iPSC lines was carried out as described before (8). Briefly, mouse embryonic fibroblasts were transduced with the cocktail of retroviruses containing *Oct4*, *Sox2*, *c-Myc* and *Klf4*. After 3 days in fibroblast culture medium, the medium was

changed to stem cell medium containing leukaemia inhibitory factor (LIF). Medium change was performed every day until two weeks when the colonies were picked up and expanded in feeder free medium. Mouse ES and iPS cells were cultured without MEF, on 0.1% gelatin coated plates. Usually 1:3 ratio of cells passaged in every culture. The medium was DMEM/F12 containing knockout serum replacement (KSR) 10%, L-glutamine 1%, penicillin/streptomycin 1%, non-essential amino acids 1%, sodium pyruvate 1% and LIF 1000U/ml. Differentiation toward neuronal progenitors was carried out based on (9) with some modifications. Mouse iPSCs were dissociated and 3000 cells were seeded in each well of low adherent 96 well plates in gfCDM that contained IMDM (1X)+glutamax and F12 NUT Mix (HAM)(1x) (1:1), CD lipid concentrate 1%, 1-thioglycerol 0.004%, bovine serum albumin (99.9% pure) 0.25 % and penicillin/streptomycin 1%. After several days in this medium based on the different protocols (3-7 days) the medium was changed to DFK medium (DMEM/F12, knockout serum replacement 10%, penicillin streptomycin 1% and glucose monohydrate 7mg/ml). After 12-14 days, the embryonic bodies (EBs) were either collected for RNA extraction and gene expression analysis or dissociated and plated on poly-D-Lysine coated dishes in the mature neuronal medium containing neurobasal medium, B-27 supplement 2%, penicillin/streptomycin 1% and L-glutamine 1%.

**Viral vector construction and virus production:** The *Oct3/4* (Plasmid #13366), *Sox2* (Plasmid #13367), *c-Myc* (Plasmid #13375) and *Klf4* (Plasmid #13370) retrovectors to establish mouse iPSCs were purchased from Addgene. Retrovirus generation was performed based on current protocol (8). pRRLSIN.cPPT.mmPmch-EGFP-PGK-GFP.WPRE vector that was used to purify MCH cells is based on pRRLSIN.cPPT.PGK-

GFP.WPRE (gift from Dr. Didier Trono - EPFL) which has been modified and the sequences of interest were inserted. AAV-EF1a-DIO mCherry virus used for purification of HCRT cells were purchased from North Carolina University vector core. Lenti and retroviruses were packaged in 293FT and PLAT-E viral packaging cells (10).

#### **Immunofluorescence and Alkaline Phosphatase Activity Staining:**

Immunofluorescence was performed after fixation of the cultured cells in 4% paraformaldehyde for 10 min, permeabilization with 0.2 % Triton X-100 for 15 min, and blocking in PBS supplemented with 10% serum of the species in which secondary antibody was raised for 1 h. Cells were incubated overnight with the primary antibodies at 4 °C, washed, and incubated with secondary antibodies. Nuclei were counterstained with 1 µg/ml DAPI (Sigma-Aldrich). Alkaline phosphatase (ALP) activity was detected by a commercial kit (Sigma-Aldrich, 86R).

**ELISA for neuropeptide secretion quantification:** EBs were dissociated and cultured on PDL coated dishes for two to three weeks. For the secretion analysis, the medium was changed the day before. The stimulations with TRH and orexin were performed three hours before cells and medium collection. The medium collected and centrifuged to remove any cell debris and kept at -80 until the day of ELISA. The concentrations of the HCRT and MCH in the medium were quantified by ELISA kits from Phoenix Pharmaceuticals (FEK-003-30 and FEK-070-47).

**Morpholino study in zebrafish:** The morpholino antisense oligos were purchased from Genetools (<http://www.gene-tools.com>) (**SI Appendix, Table S7**). Breeding couples were made the day before and the eggs were collected for morpholino injection the next day. Injections of translation blocking morpholino oligo were performed into 1-cell stage

embryos from AB strain. Zebrafish larvae were raised at 28°C on 14/10h light/dark cycle. The fish were fixed for immunostaining either at 48 or 72hpf. Three or four doses of morpholinos were injected (for HCRT neuron analysis: 1.25, 2.5 and 5ng; for MCH neuron analysis: 0.6, 1.25, 2.5 and 5ng). Control embryos were injected with H<sub>2</sub>O. Lethality and developmental defects were referenced for each conditions based on standard morphological criteria (11). For immunostaining protocol, embryos were anesthetized with tricaine (MS-222- Sigma). Dissected heads were isolated from 48 or 72hpf embryos and fixed in 2%PFA for 90 min prior to the permeabilization in PBS/Triton1% for 2h. Immunolabelling was performed with rabbit Orexin-A (ab3704, Millipore) and rabbit MCH (H-070-47, Phoenix Pharmaceuticals) and incubated at 1/200 overnight at 4°C. Image acquisition was performed on confocal laser scanning microscope to analyze the presence of HCRT or MCH neurons in wild-type and morphant brains.

**Characterization of *Peg3*<sup>+/-</sup> (paternal allele deletion) mice.** Brains from adult

*Peg3*<sup>+/+</sup> and *Peg3*<sup>+/-</sup> mice were dissected after perfusion fixation with 10% formalin fixative. The brains were cut at 20 um thickness covering bregma from -0.7 mm to -2.18 mm. Ten slides were prepared from each brain and 9 sections were mounted on each slide. Among 9 sections, 4 sections contained HCRT and MCH neurons from anterior to posterior (-1.06 mm to -1.94 mm around).

**Pathway analysis and gene network construction:** Protein and pathway data were extracted from Uniprot and KEGG databases. Scripts in Python programming language with bioservices module was used for database connection and data extraction and analysis. Gene network construction was performed using text mining and String (12), Trustrust (13) and BioGRID (14) databases.

**A**

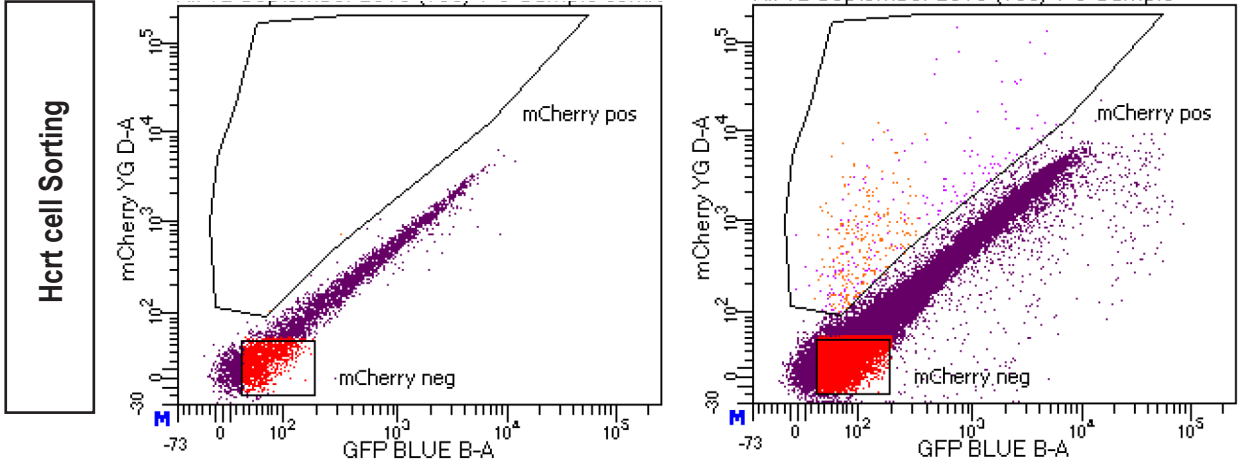

**B**

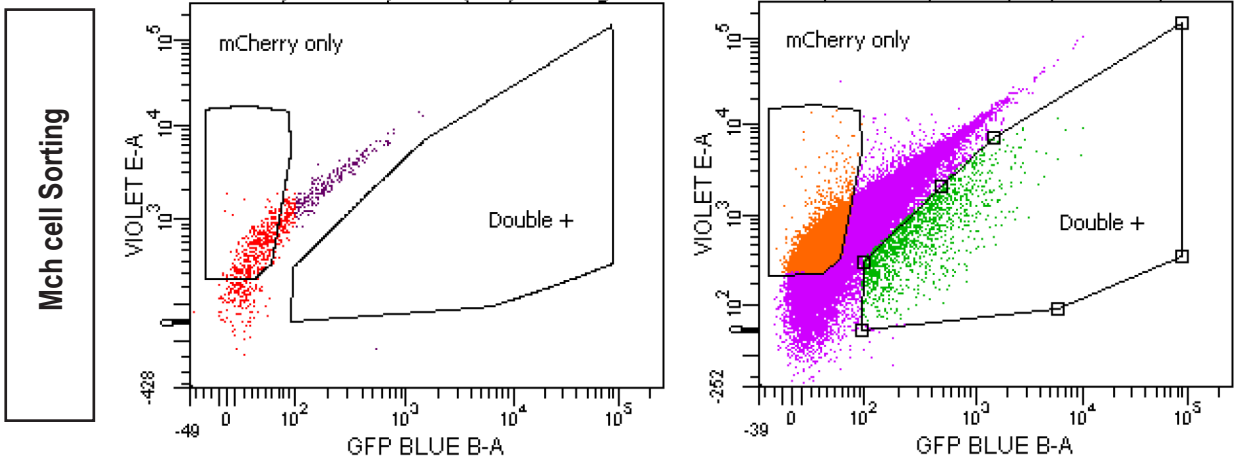

**Ctrl**

**Transduced**

**C**

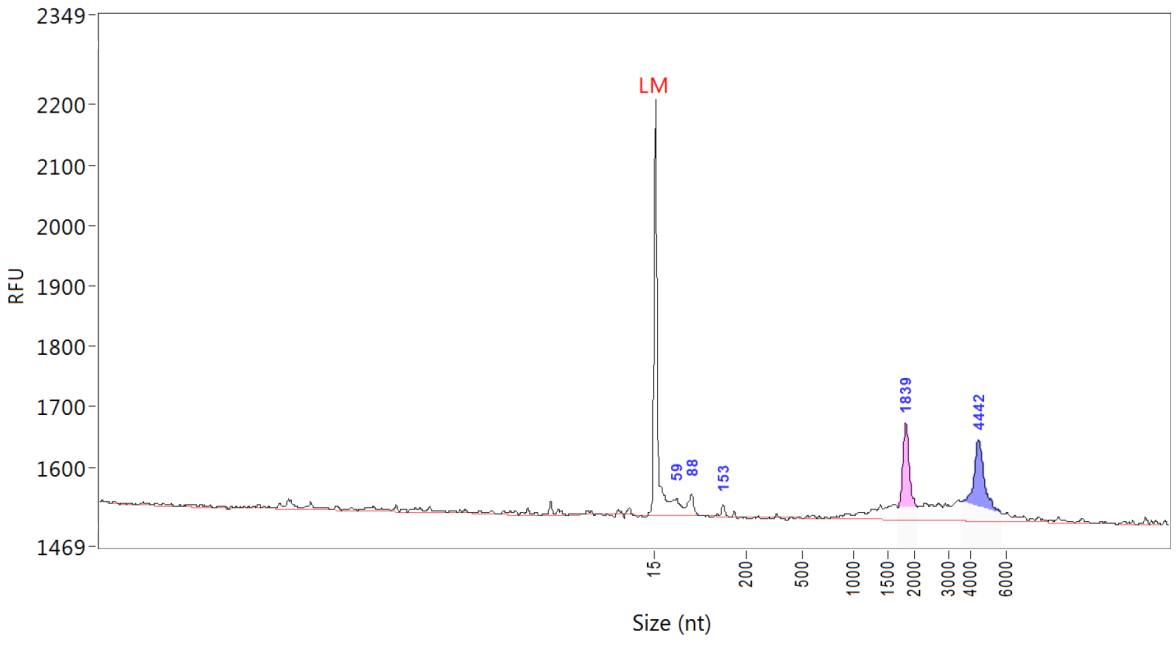

**Fig S1. Isolation of Hcrt and Mch cells by FACS sorting. (A)** Hcrt cell sorting: dissociated hypothalamic neurospheres were FACS sorted. Only cells expressing Cre recombinase (HCRT cells) expressed mCHERRY. The cells were sorted based on fluorescent intensity and size. Before the sorting of mCHERRY positive samples, using control cells the region where mCHERRY positive cells (left, mCherry pos area) and mCHERRY negative cells (left, mCherry neg area) that should be gated was delineated. mCHERRY positive cells (mCHERRY pos (HCRT cells), mixed color) were collected and compared with mCHERRY negative cells (mCHERRY neg (rest of hypothalamic cells), red). Only cells from a small portion of the mCHERRY negative area that was far from positive cells, were collected for comparisons (red) (right). **(B)** MCH cell sorting: double positive cells for EGFP and mCHERRY (Double + (MCH cells), green) were collected and compared with mCHERRY positive cells (mCHERRY only (rest of hypothalamic cells), red). **(C)** Low amount but high quality RNA was extracted from purified cells. The purple and blue peaks represent the presence of ribosomal RNA 18S and 28S with the size of 1839 and 4442 nt respectively. Sharp peaks of these ribosomal RNA indicate that the RNAs are intact and not degraded (degraded RNAs do not exhibit sharp ribosomal peaks and the peaks shift to the left indicating their smaller size). In general, the fragment analyzer gives a RNA integrity value (RQN or RIN) which is an indication of the integrity of the RNA. 10 is completely intact, 0 completely degraded. In this Figure the RQN is 9.



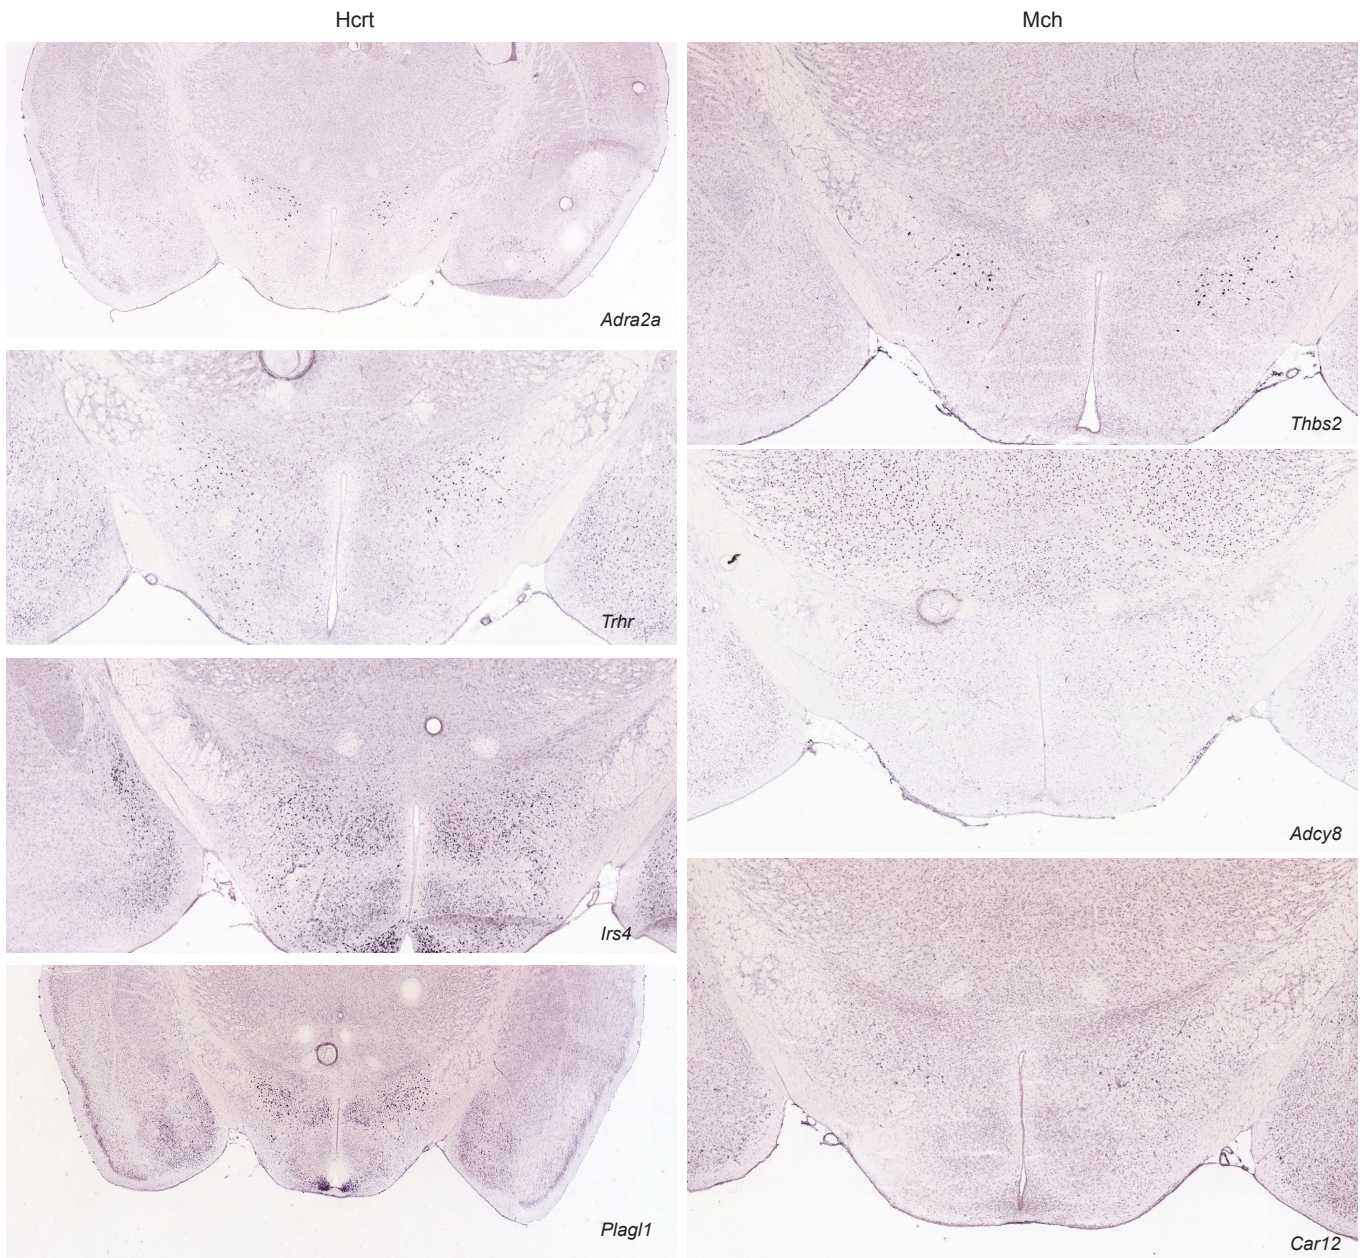

**Fig S2.** LH distribution of some representative identified genes.

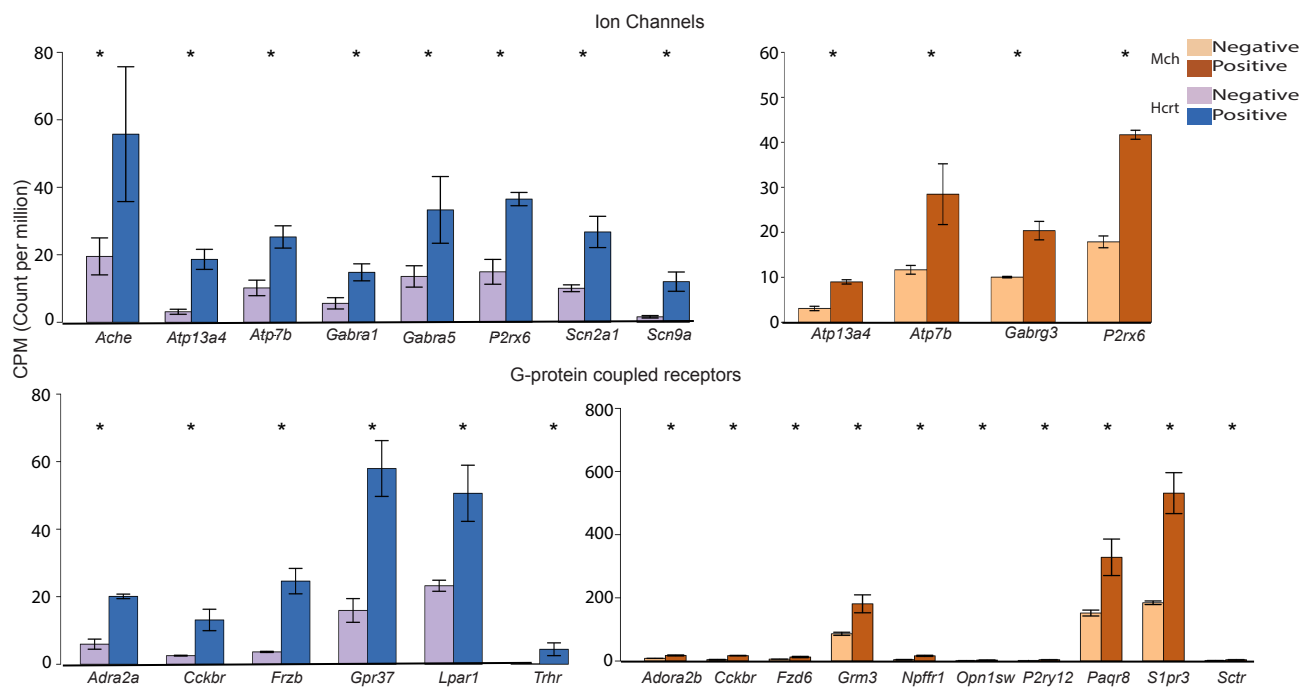

**Fig S3.** Ion channels and receptors enriched in Hct and Mch cells.

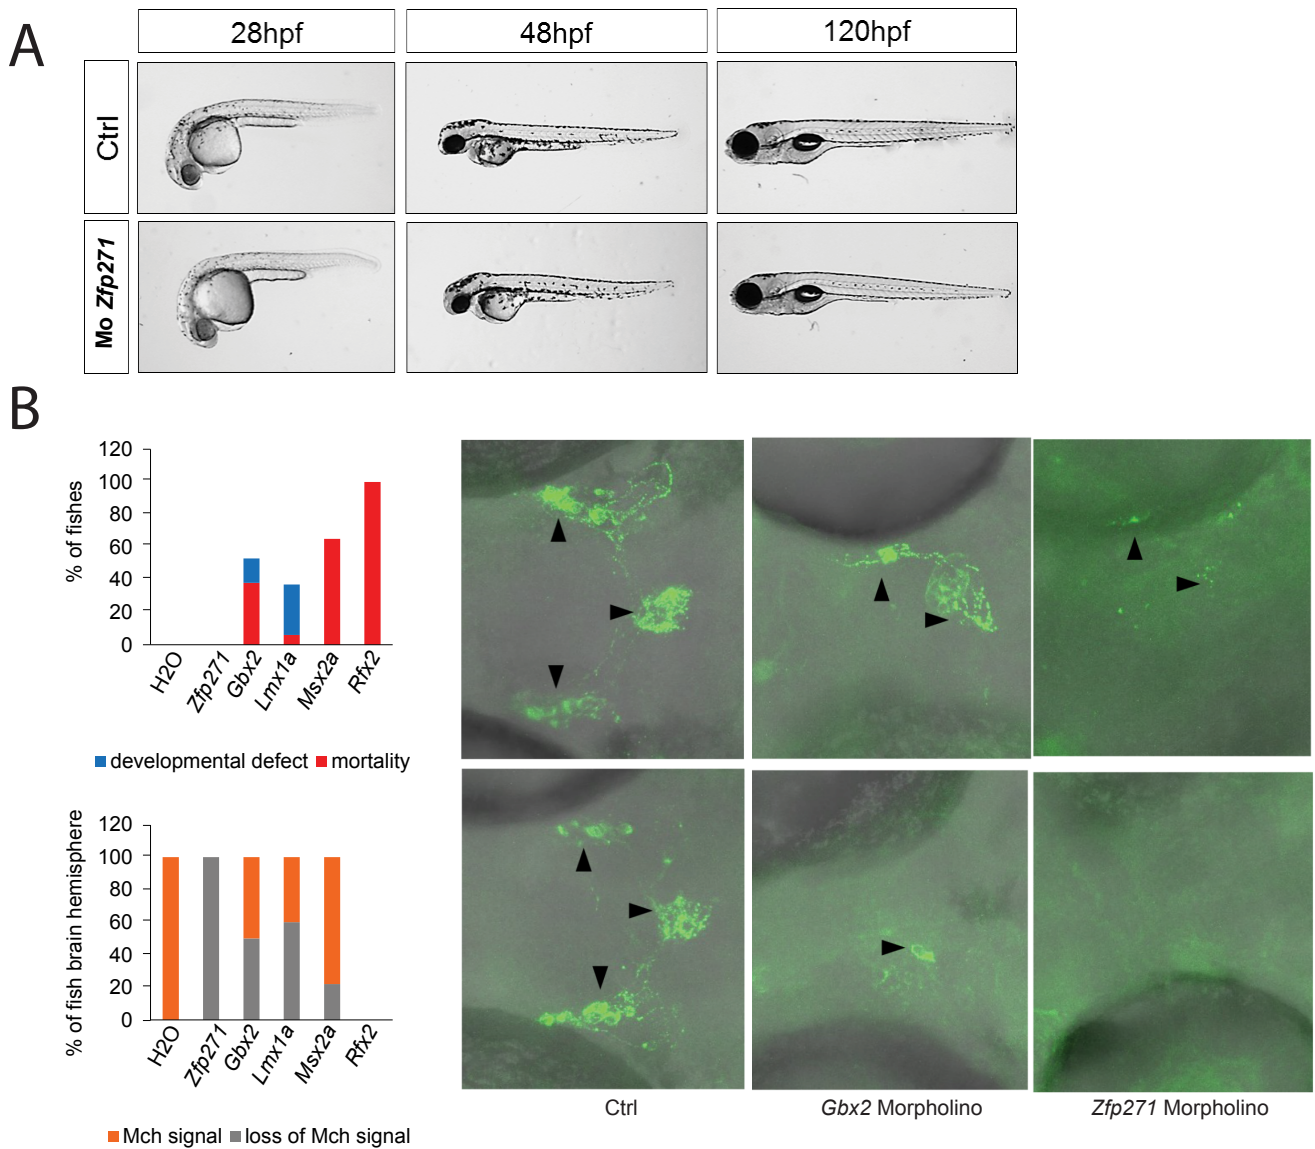

**Fig S4.** Morpholino knock-down of candidate TFs identified the effective ones for *Pmch* gene expression. (A) *Zfp271* morpholino did not induce any developmental defect. (B) Mortality and developmental defect rate (left up), Loss of MCH signal and its positive signal after immunostaining (left bottom). Representative image of loss of HCRT signal in *Zfp271* morpholino-injected zebrafish brains compared to controls (right).

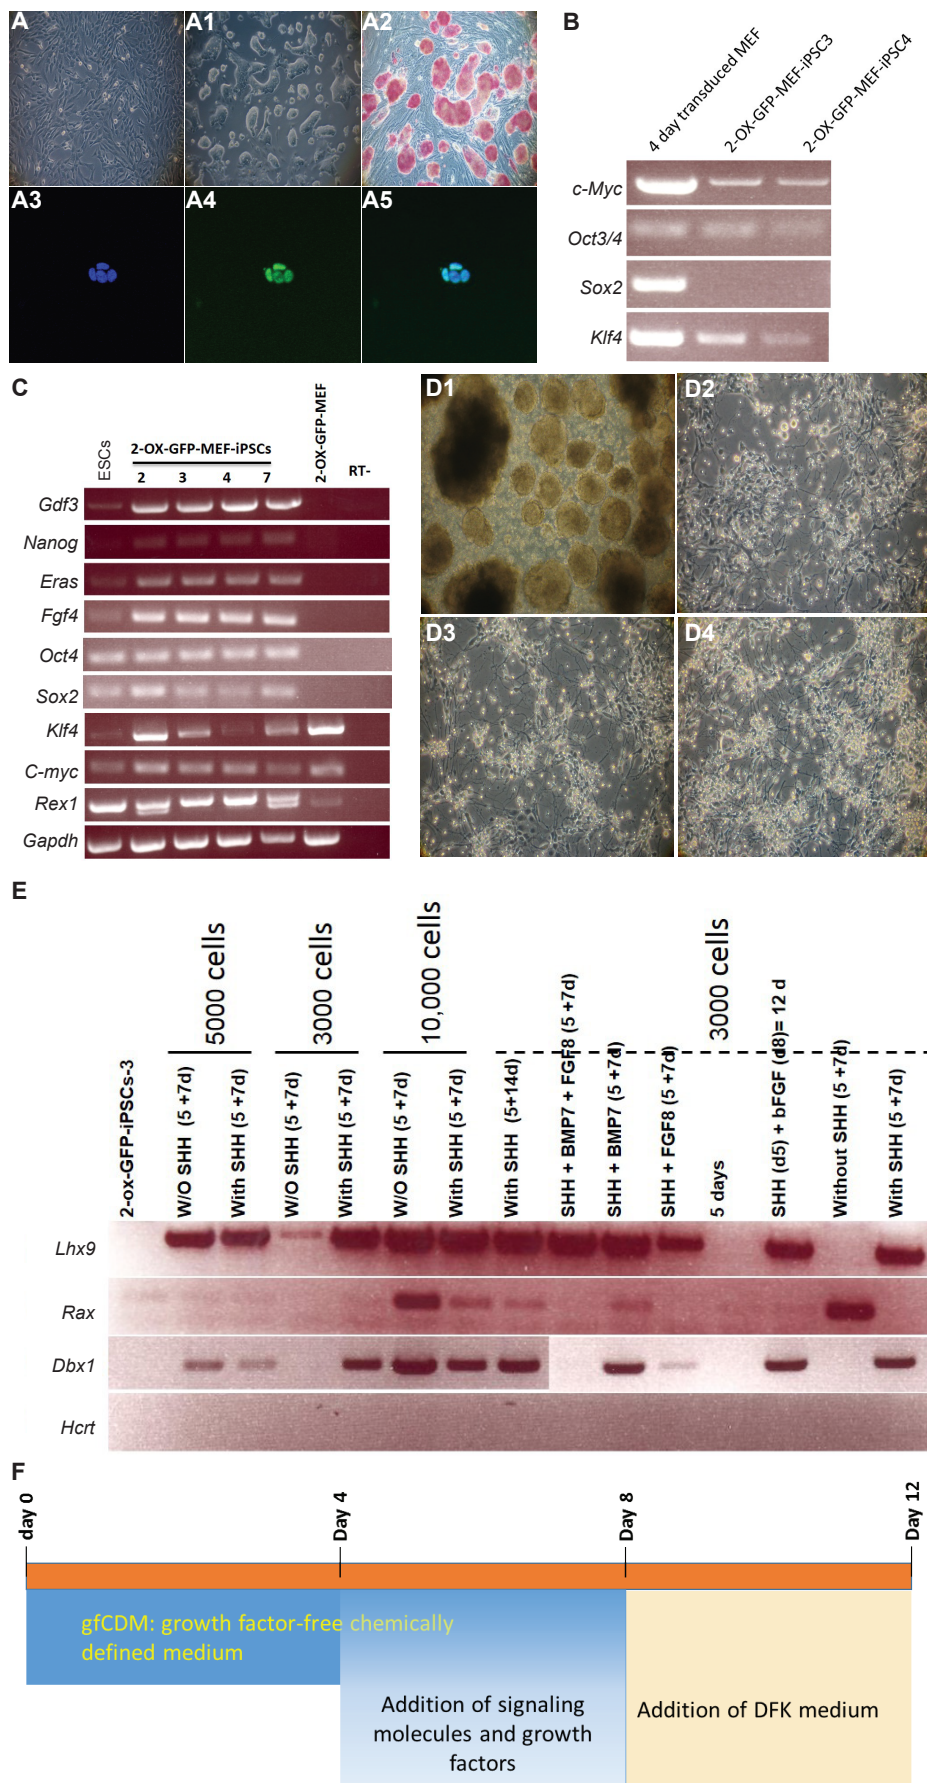

**Fig S5.** Establishment of iPSCs from mouse embryonic fibroblast. (A-A5) iPSCs were established from orexin-EGFP mouse embryonic fibroblasts (A). Feeder free culture of established iPSCs (A1). Established iPSCs were positive for alkaline phosphatase staining (A2). They strongly expressed NANOG in the nucleus (A3-A5). (B) Established iPSCs silenced their transgenes. (C) RT-PCR analysis of ES cell-marker genes. (D) Differentiation of iPSCs toward neural lineage. (E) Screening of different conditions to induce *Hcrt* gene expression. (F) Established protocol to generate MCH cells.

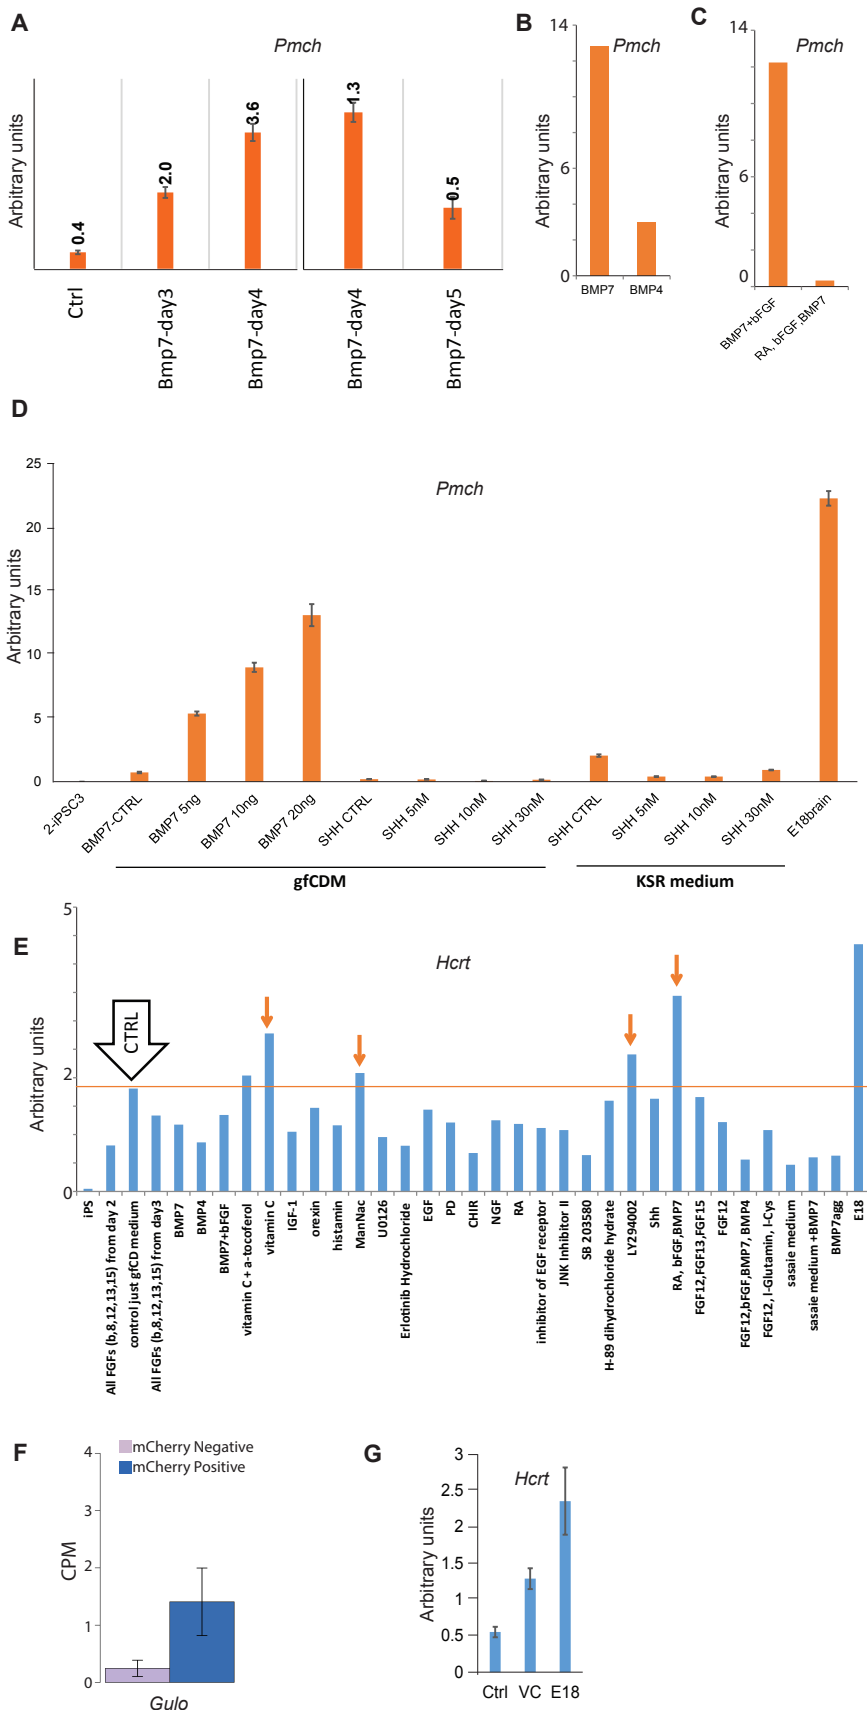

**Fig S6.** Evaluation of the behavior of different signaling molecule and growth factors to induce Hcrt and Pmch expression. (A) Effect of Bmp7 on Pmch gene expression during different days. (B) Effect of other Bmp family members on Pmch expression. (C) Effect of retinoic acid, a main CNS caudalizing molecule on the expression of Pmch. (D) Effect of Bmp7 is dose dependent and Shh has no effect on the expression of Pmch. (E) Screening of the different molecules to induce Hcrt gene expression. (F) Gulo is among genes upregulated in Hcrt cell RNA sequencing. (G) The effect of vitamin C is the only reproducible one.

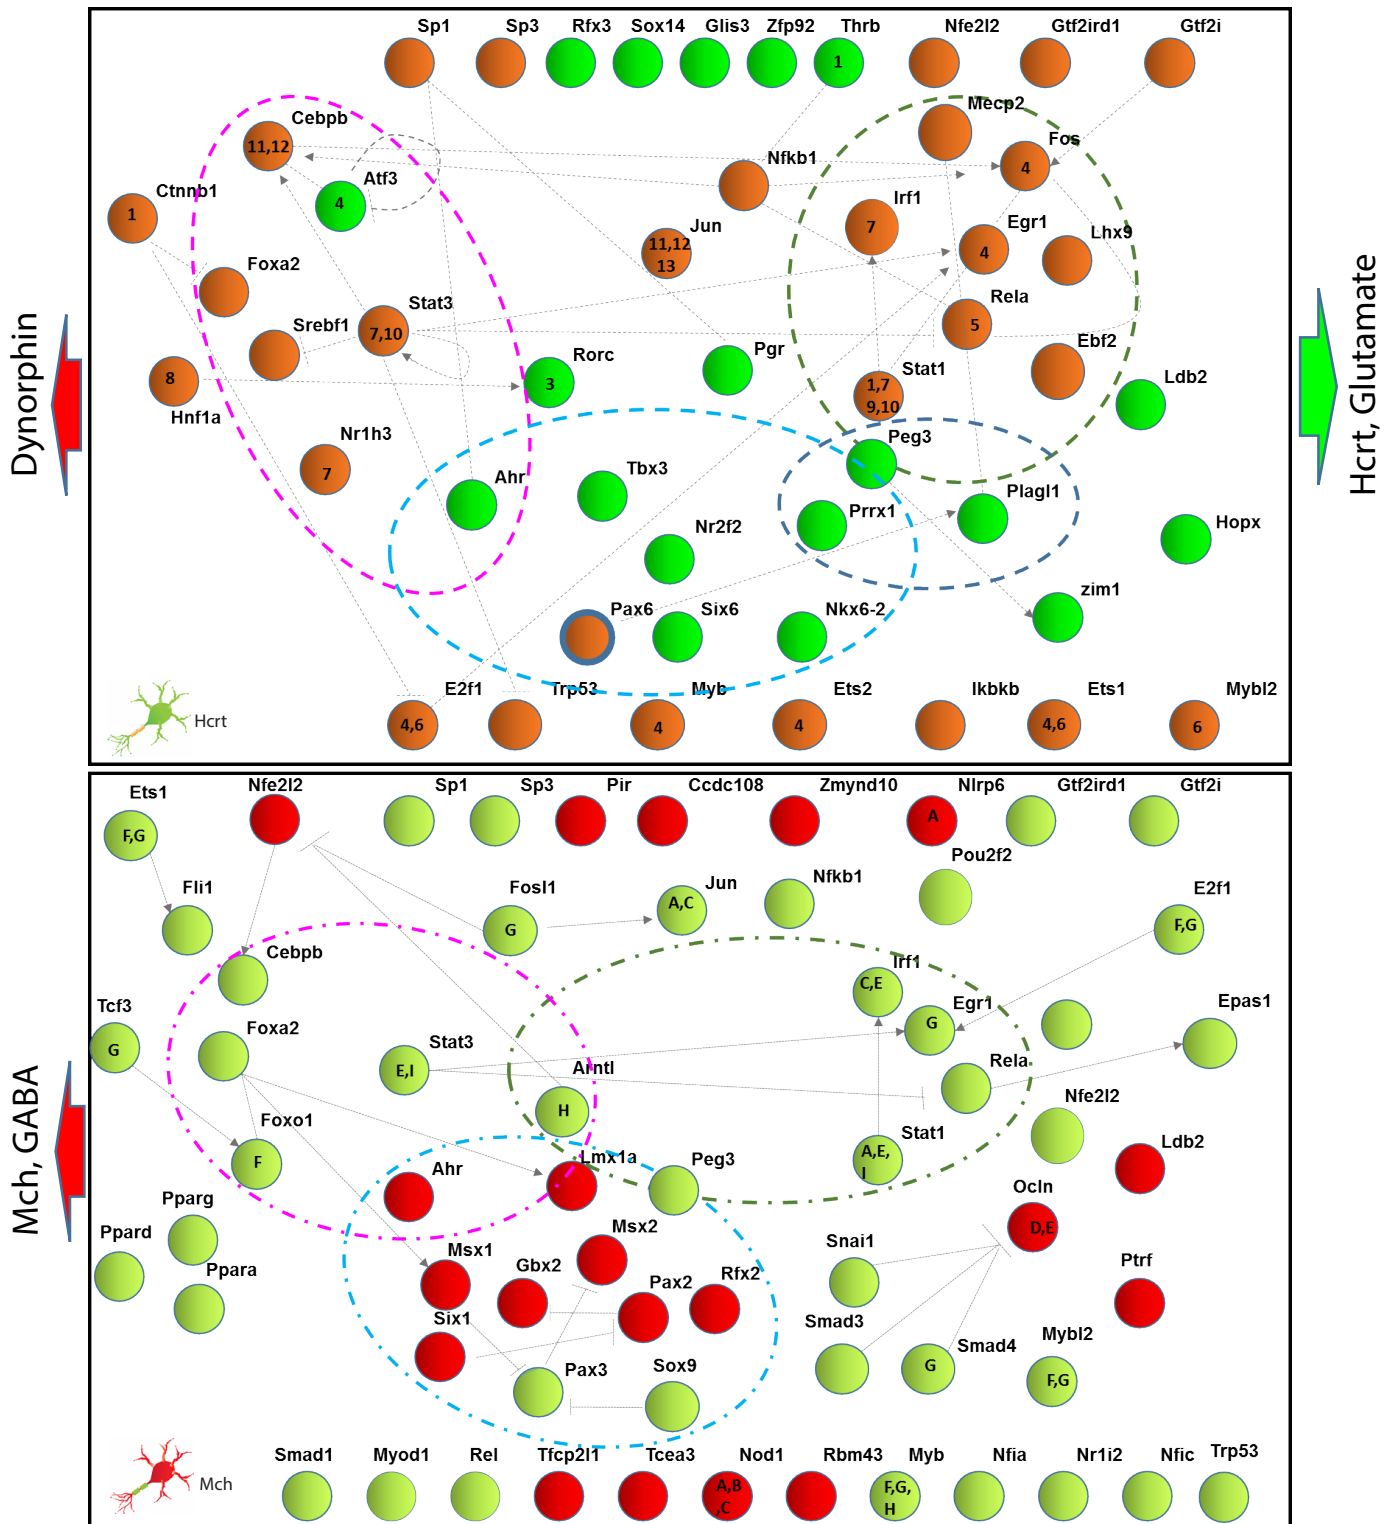

**Fig S7.** Core Transcriptional Regulatory Circuitry in HCRT and MCH cells. The TFs depicted here are expressed in HCRT and MCH cells. The criteria for inclusion are explained in the text. Due to multifunctionality of HCRT and MCH cells, it is hypothesized that different regulatory TFs might participate in their involvement in different physiological and behavioral phenotypes. In these gene networks, interactions are either activation (arrow head), inhibition (hammer head), or unknown. Only proven interactions are included. Spatial distribution of the TFs does not follow any specific rule except being in the same phenotypical groups and avoiding complexity. TFs directly affecting Hcrt expression such as LHX9, PEG3 and EBF2 affect several phenotypes. For instance: LHX9 (development, sleep), EBF2 (development, sleep), and PEG3 (development, sleep, obesity). How these cells are involved in fatigue and disease-induced hypersomnia might be due to the enrichment of TFs that are part of immune-related pathways. HCRT map: (circles: sleep, obesity, development, feeding phenotypes) (Green balls indicate TFs in our RNA sequencing, brown balls are based on databases). MCH map: (circles: sleep, feeding, development phenotypes) (Red balls indicate our TFs, green balls are based on databases). Numbers and letters inside TFs indicate their involvement in a specific pathway (Table S6). The major known outputs for HCRT map would be HCRT, DYNORPHIN and GLUTAMATE secretion and for MCH map, MCH and GABA.

**Table S1.** Differentially expressed genes between *Hcrt-ataxin-3*, *Hcrt<sup>ko/ko</sup>* mice and their respective controls.**OXAt\_tg versus OXAt\_ctl**

| Tissue       | Fold-Change | stat      | pvalue  | padj    | Gene_ID            | Associated_Gene_Name |
|--------------|-------------|-----------|---------|---------|--------------------|----------------------|
| Brain stem   | 1.43        | 7.19742   | 0.00000 | 0.00000 | ENSMUSG00000029253 | Cenpc1               |
| Cortex       | -1.329      | -7.15342  | 0.00000 | 0.00000 | ENSMUSG00000006731 | B4galnt1             |
| Cortex       | 1.416       | 6.80178   | 0.00000 | 0.00000 | ENSMUSG00000029253 | Cenpc1               |
| Cortex       | -1.175      | -4.54557  | 0.00001 | 0.02736 | ENSMUSG00000019467 | Arhgef25             |
| Hypothalamus | -29.61      | -25.21023 | 0.00000 | 0.00000 | ENSMUSG00000045471 | Hcrt                 |
| Hypothalamus | 1.493       | 6.37660   | 0.00000 | 0.00000 | ENSMUSG00000029253 | Cenpc1               |
| Hypothalamus | 1.296       | 5.03342   | 0.00000 | 0.00229 | ENSMUSG00000021379 | Id4                  |
| Hypothalamus | 1.428       | 4.57806   | 0.00000 | 0.01675 | ENSMUSG00000070306 | Ccdc153              |
| Hypothalamus | -1.858      | -4.45447  | 0.00001 | 0.02401 | ENSMUSG00000043102 | Qrfp                 |
| Hypothalamus | -1.308      | -4.28333  | 0.00002 | 0.04380 | ENSMUSG00000035202 | Lars2                |
| Hypothalamus | -1.411      | -4.19752  | 0.00003 | 0.05503 | ENSMUSG00000021587 | Pcsk1                |

**OXKO\_ko versus OXKO\_ctl**

| Tissue     | Fold-Change | stat      | pvalue  | padj    | Gene_ID            | Associated_Gene_Name |
|------------|-------------|-----------|---------|---------|--------------------|----------------------|
| Brain stem | 1.68554     | 9.33957   | 0.00000 | 0.00000 | ENSMUSG00000020926 | Adam11               |
| Brain stem | 1.66480     | 7.35145   | 0.00000 | 0.00000 | ENSMUSG00000045471 | Hcrt                 |
| Brain stem | -1.46723    | -6.87036  | 0.00000 | 0.00000 | ENSMUSG00000017400 | Stac2                |
| Brain stem | -1.57050    | -6.05630  | 0.00000 | 0.00001 | ENSMUSG00000001555 | Fkbp10               |
| Brain stem | -1.43584    | -5.75912  | 0.00000 | 0.00003 | ENSMUSG00000017747 | Ghdc                 |
| Brain stem | -1.63517    | -5.65155  | 0.00000 | 0.00004 | ENSMUSG00000025270 | Alas2                |
| Brain stem | 1.27546     | 5.59200   | 0.00000 | 0.00005 | ENSMUSG00000018160 | Med1                 |
| Brain stem | -1.52641    | -5.40702  | 0.00000 | 0.00012 | ENSMUSG00000010362 | Rdm1                 |
| Brain stem | -1.39387    | -5.12412  | 0.00000 | 0.00050 | ENSMUSG00000017493 | Igfbp4               |
| Brain stem | 1.18158     | 4.69536   | 0.00000 | 0.00401 | ENSMUSG00000078676 | Casc3                |
| Brain stem | 1.34138     | 4.63686   | 0.00000 | 0.00484 | ENSMUSG00000034768 | Asb16                |
| Brain stem | -1.27875    | -4.59500  | 0.00000 | 0.00543 | ENSMUSG00000045007 | Tubg2                |
| Brain stem | -1.48378    | -4.27994  | 0.00002 | 0.02164 | ENSMUSG00000073940 | Hbb-bt               |
| Brain stem | -1.26266    | -4.24951  | 0.00002 | 0.02285 | ENSMUSG00000034255 | Arhgap27             |
| Brain stem | -1.47625    | -4.23581  | 0.00002 | 0.02285 | ENSMUSG00000069917 | Hba-a2               |
| Brain stem | -1.39301    | -4.08451  | 0.00004 | 0.04154 | ENSMUSG00000004043 | Stat5a               |
| Brain stem | 1.24887     | 4.03084   | 0.00006 | 0.04920 | ENSMUSG00000055866 | Per2                 |
| Cortex     | -3.35949    | -18.00596 | 0.00000 | 0.00000 | ENSMUSG00000020912 | Krt12                |
| Cortex     | -2.46530    | -17.92958 | 0.00000 | 0.00000 | ENSMUSG00000035355 | Kcnh4                |
| Cortex     | -1.38052    | -10.81855 | 0.00000 | 0.00000 | ENSMUSG00000017400 | Stac2                |
| Cortex     | -1.36654    | -7.95668  | 0.00000 | 0.00000 | ENSMUSG00000017417 | Plxdc1               |
| Cortex     | -1.80342    | -7.44388  | 0.00000 | 0.00000 | ENSMUSG00000017747 | Ghdc                 |
| Cortex     | 1.20316     | 7.24904   | 0.00000 | 0.00000 | ENSMUSG00000020926 | Adam11               |
| Cortex     | -1.80435    | -6.33446  | 0.00000 | 0.00000 | ENSMUSG00000061086 | Myl4                 |
| Cortex     | -1.40910    | -6.25157  | 0.00000 | 0.00000 | ENSMUSG00000027318 | Adam33               |
| Cortex     | 1.22274     | 6.06325   | 0.00000 | 0.00000 | ENSMUSG00000018160 | Med1                 |
| Cortex     | -1.22679    | -5.97759  | 0.00000 | 0.00000 | ENSMUSG00000020932 | Gfap                 |
| Cortex     | -1.26471    | -5.90555  | 0.00000 | 0.00000 | ENSMUSG00000017188 | Coa3                 |
| Cortex     | 1.28669     | 5.66043   | 0.00000 | 0.00002 | ENSMUSG00000035198 | Tubg1                |
| Cortex     | 1.18338     | 5.27084   | 0.00000 | 0.00016 | ENSMUSG00000001313 | Rnd2                 |
| Cortex     | -1.25906    | -5.15140  | 0.00000 | 0.00028 | ENSMUSG00000032128 | Robo3                |
| Cortex     | 1.22948     | 5.09670   | 0.00000 | 0.00035 | ENSMUSG00000062151 | Unc13c               |
| Cortex     | 1.19784     | 4.91036   | 0.00000 | 0.00085 | ENSMUSG00000024222 | Fkbp5                |
| Cortex     | -1.21463    | -4.89899  | 0.00000 | 0.00085 | ENSMUSG00000045007 | Tubg2                |
| Cortex     | 1.16788     | 4.87101   | 0.00000 | 0.00092 | ENSMUSG00000052373 | Mpp3                 |
| Cortex     | -1.19359    | -4.76784  | 0.00000 | 0.00147 | ENSMUSG00000016763 | Scube1               |
| Cortex     | -1.34581    | -4.72022  | 0.00000 | 0.00176 | ENSMUSG00000052305 | Hbb-bs               |
| Cortex     | 1.44482     | 4.63857   | 0.00000 | 0.00250 | ENSMUSG00000002831 | Plin4                |
| Cortex     | 1.50684     | 4.43694   | 0.00001 | 0.00621 | ENSMUSG00000001493 | Meox1                |
| Cortex     | 1.36051     | 4.24021   | 0.00002 | 0.01396 | ENSMUSG00000051617 | Krt9                 |
| Cortex     | -1.16723    | -4.23980  | 0.00002 | 0.01396 | ENSMUSG00000028173 | Wls                  |
| Cortex     | -1.21694    | -4.22119  | 0.00002 | 0.01456 | ENSMUSG00000020919 | Stat5b               |
| Cortex     | 1.20405     | 4.15031   | 0.00003 | 0.01864 | ENSMUSG00000032946 | Rasgrp2              |
| Cortex     | 1.45606     | 4.14633   | 0.00003 | 0.01864 | ENSMUSG00000034768 | Asb16                |
| Cortex     | -1.34703    | -4.13934  | 0.00003 | 0.01864 | ENSMUSG00000035258 | Abi3bp               |
| Cortex     | 1.50596     | 4.12255   | 0.00004 | 0.01936 | ENSMUSG00000019312 | Grb7                 |

|              |           |           |         |         |                     |         |
|--------------|-----------|-----------|---------|---------|---------------------|---------|
| Cortex       | -1.17701  | -4.11278  | 0.00004 | 0.01952 | ENSMUSG00000042834  | Nrep    |
| Cortex       | -1.14400  | -4.05235  | 0.00005 | 0.02450 | ENSMUSG00000030270  | Cpne9   |
| Cortex       | -1.15630  | -4.04101  | 0.00005 | 0.02492 | ENSMUSG00000004040  | Stat3   |
| Cortex       | -1.37244  | -3.99325  | 0.00007 | 0.02922 | ENSMUSG000000091898 | Tnnc1   |
| Cortex       | 1.15054   | 3.98910   | 0.00007 | 0.02922 | ENSMUSG00000044352  | Sowaha  |
| Cortex       | 1.15155   | 3.96770   | 0.00007 | 0.03106 | ENSMUSG00000038020  | Rapgef1 |
| Cortex       | -1.32734  | -3.91386  | 0.00009 | 0.03780 | ENSMUSG00000045246  | Kcng4   |
| Cortex       | -1.16058  | -3.87835  | 0.00011 | 0.04258 | ENSMUSG00000055409  | Nell1   |
| Hypothalamus | -16.00331 | -19.27567 | 0.00000 | 0.00000 | ENSMUSG00000045471  | Hcrt    |
| Hypothalamus | -1.83374  | -7.08441  | 0.00000 | 0.00000 | ENSMUSG00000017747  | Ghdc    |
| Hypothalamus | -1.51737  | -4.98155  | 0.00000 | 0.00300 | ENSMUSG00000001555  | Fkbp10  |
| Hypothalamus | 1.66487   | 4.53692   | 0.00001 | 0.02037 | ENSMUSG00000002831  | Plin4   |



**Table S2.** Differentially expressed genes between purified HCRT and MCH neurons and their respective controls (rest of hypothalamic cells).

| HCRT               |           |             |           | MCH                |            |             |               |
|--------------------|-----------|-------------|-----------|--------------------|------------|-------------|---------------|
| GeneID             | adj.P.Val | Fold_Change | Gene_Name | GeneID             | adj.P.Val  | Fold_Change | Gene_Name     |
| ENSMUSG00000038760 | 0.011781  | 112.8243454 | Trhr      | ENSMUSG00000062960 | 0.0006278  | 9.028951779 | Kdr           |
| ENSMUSG0000004609  | 0.038685  | 87.5114262  | Cd33      | ENSMUSG00000063727 | 0.01983425 | 8.091122162 | Tnfrsf11b     |
| ENSMUSG00000028859 | 0.027946  | 85.95940264 | Csf3r     | ENSMUSG00000051648 | 0.00483747 | 7.575469341 | Kctd19        |
| ENSMUSG00000053747 | 0.027946  | 52.68240183 | Sox14     | ENSMUSG00000061808 | 2.3795E-05 | 6.323343168 | Ttr           |
| ENSMUSG00000031374 | 0.038685  | 44.16840033 | Zfp92     | ENSMUSG00000105096 | 0.00192927 | 5.92768175  | Gbp10         |
| ENSMUSG00000045648 | 0.035698  | 40.06177111 | Vwv2l     | ENSMUSG00000019232 | 0.02904416 | 5.618146853 | Etnppl        |
| ENSMUSG00000026483 | 0.029218  | 37.68746862 | Fam129a   | ENSMUSG00000026692 | 0.02428029 | 5.607714143 | Fmo4          |
| ENSMUSG00000021565 | 0.042259  | 37.45866819 | Slc6a19   | ENSMUSG00000021469 | 0.00112113 | 5.502695192 | Msx2          |
| ENSMUSG00000059555 | 0.027946  | 33.2181237  | Tor4a     | ENSMUSG00000048108 | 0.01938401 | 5.184473628 | Tmem72        |
| ENSMUSG00000020865 | 0.036041  | 32.38233956 | Abcc3     | ENSMUSG00000032315 | 0.03375032 | 5.109704996 | Cyp1a1        |
| ENSMUSG00000036362 | 0.035698  | 32.05522123 | P2ry13    | ENSMUSG00000036594 | 0.00323251 | 4.932158256 | H2-Aa         |
| ENSMUSG00000082361 | 0.036097  | 24.41462214 | Btc       | ENSMUSG00000072244 | 0.03971022 | 4.835081737 | Trim6         |
| ENSMUSG00000032523 | 0.040285  | 23.16130467 | Hhatl     | ENSMUSG00000022218 | 0.01311691 | 4.764170885 | Tgm1          |
| ENSMUSG00000075225 | 0.036099  | 21.93674607 | Ccdc162   | ENSMUSG00000041460 | 0.02732231 | 4.636855733 | Cacna2d4      |
| ENSMUSG00000093765 | 0.042183  | 21.28008362 | Gm20658   | ENSMUSG00000023885 | 0.00064512 | 4.491332379 | Thbs2         |
| ENSMUSG00000053025 | 0.011921  | 20.9549896  | Sv2b      | ENSMUSG00000045094 | 0.04356226 | 4.442185064 | Arhgef37      |
| ENSMUSG00000027857 | 0.038685  | 19.48169736 | Tshb      | ENSMUSG00000032373 | 0.00748485 | 4.427580608 | Car12         |
| ENSMUSG00000058427 | 0.038054  | 18.41045724 | Cxcl2     | ENSMUSG00000021390 | 0.03731046 | 4.373870312 | Ogn           |
| ENSMUSG00000052026 | 0.008932  | 18.12763584 | Slc6a7    | ENSMUSG00000020225 | 4.0532E-05 | 4.349938527 | Lect1         |
| ENSMUSG00000038521 | 0.034674  | 16.57644091 | C1s1      | ENSMUSG00000063975 | 0.0122573  | 4.19119284  | Slo1a5        |
| ENSMUSG00000032202 | 0.038685  | 15.7433368  | Rab27a    | ENSMUSG00000036961 | 0.00896875 | 4.115073171 | Wnt8b         |
| ENSMUSG00000046186 | 0.014089  | 14.16419203 | Cd109     | ENSMUSG00000039616 | 0.01582157 | 4.092438398 | Mocos         |
| ENSMUSG00000041423 | 0.018452  | 13.89789214 | Paqr6     | ENSMUSG00000033542 | 0.02495599 | 4.03193076  | Arhgef5       |
| ENSMUSG00000026904 | 0.013211  | 13.24265349 | Slc4a10   | ENSMUSG00000039155 | 0.01339023 | 3.988617144 | Cdh26         |
| ENSMUSG00000027315 | 0.006447  | 11.65317843 | Spint1    | ENSMUSG00000002944 | 0.00177213 | 3.983399698 | Cd36          |
| ENSMUSG00000056380 | 0.007551  | 11.39072965 | Gpr50     | ENSMUSG0000001508  | 0.04997179 | 3.965640202 | Sgca          |
| ENSMUSG00000029403 | 0.014203  | 11.21483784 | Cdkl2     | ENSMUSG00000030898 | 0.00088719 | 3.95012525  | Cckbr         |
| ENSMUSG00000050103 | 0.040379  | 11.1755694  | Agmo      | ENSMUSG00000046186 | 0.00350053 | 3.949130587 | Cd109         |
| ENSMUSG00000038840 | 0.029548  | 10.1905096  | Birc7     | ENSMUSG00000029843 | 0.00192927 | 3.918380917 | Slc13a4       |
| ENSMUSG00000060176 | 0.012683  | 9.634093958 | Kif27     | ENSMUSG00000035383 | 0.00030639 | 3.89178832  | Pmch          |
| ENSMUSG00000000290 | 0.039811  | 9.535537144 | Itgb2     | ENSMUSG00000027713 | 0.01066366 | 3.873095394 | 1810062G17Rik |
| ENSMUSG00000025887 | 0.04779   | 9.449689462 | Casp12    | ENSMUSG00000097339 | 0.01523335 | 3.845290543 | Gm26671       |
| ENSMUSG00000042286 | 0.028923  | 9.377748476 | Stab1     | ENSMUSG00000108841 | 0.00935733 | 3.840198722 | Gm626         |
| ENSMUSG00000056158 | 0.005537  | 9.337183623 | Car10     | ENSMUSG00000020090 | 0.00080199 | 3.688313217 | Npffr1        |
| ENSMUSG00000029371 | 0.035055  | 9.124751341 | Cxcl5     | ENSMUSG00000074813 | 0.03304611 | 3.670304289 | Gm14005       |
| ENSMUSG00000028369 | 0.018824  | 8.664457023 | Svep1     | ENSMUSG00000037362 | 0.00429664 | 3.667405782 | Nov           |
| ENSMUSG00000062151 | 0.020827  | 8.217876563 | Unc13c    | ENSMUSG00000021750 | 0.00040649 | 3.665869687 | Fam107a       |
| ENSMUSG00000020660 | 0.033809  | 8.109482847 | Pomc      | ENSMUSG00000037440 | 0.01312684 | 3.594850403 | Vnn1          |
| ENSMUSG00000036198 | 0.020612  | 8.073481389 | Arhgap36  | ENSMUSG00000032006 | 0.00142489 | 3.570998182 | Pdgd          |
| ENSMUSG00000070337 | 0.036321  | 8.018039233 | Gpr179    | ENSMUSG00000027074 | 0.00306624 | 3.541634088 | Slc43a3       |
| ENSMUSG00000027995 | 0.026269  | 7.88877889  | Tlr2      | ENSMUSG00000031351 | 0.00721496 | 3.536157264 | Zfp185        |
| ENSMUSG00000075316 | 0.009063  | 7.800767704 | Scn9a     | ENSMUSG00000109708 | 0.04012413 | 3.534045286 | RP23-238C13.2 |
| ENSMUSG00000026395 | 0.048097  | 7.526340525 | Ptprc     | ENSMUSG00000048612 | 0.00685125 | 3.512914247 | Myof          |
| ENSMUSG00000035697 | 0.029505  | 7.444346356 | Hmha1     | ENSMUSG00000029695 | 0.02233405 | 3.498478709 | Aass          |
| ENSMUSG00000031870 | 0.034068  | 7.347939537 | Pgr       | ENSMUSG00000032899 | 0.00656711 | 3.490526128 | Styk1         |
| ENSMUSG00000067578 | 0.011197  | 7.310668306 | Cbln4     | ENSMUSG00000027995 | 0.00066236 | 3.488250155 | Tlr2          |
| ENSMUSG00000063681 | 0.008942  | 7.032070578 | Crb1      | ENSMUSG00000036962 | 0.01401052 | 3.410951618 | Cfap221       |
| ENSMUSG00000030748 | 0.040202  | 6.968881884 | Il4ra     | ENSMUSG00000062778 | 0.02307533 | 3.330556685 | Chia1         |
| ENSMUSG00000002266 | 0.016674  | 6.919978478 | Zim1      | ENSMUSG00000054545 | 0.02650442 | 3.326442119 | Ugt1a6a       |
| ENSMUSG00000027004 | 0.005537  | 6.819464932 | Frzb      | ENSMUSG00000037738 | 0.0033025  | 3.316084047 | Nek5          |
| ENSMUSG00000039021 | 0.047115  | 6.725043814 | Ttc16     | ENSMUSG00000028369 | 0.0099652  | 3.311109424 | Svep1         |
| ENSMUSG00000033966 | 0.007278  | 6.684121722 | Cdkl4     | ENSMUSG00000063681 | 0.03222193 | 3.310509708 | Crb1          |
| ENSMUSG00000054667 | 0.005537  | 6.612798344 | Irs4      | ENSMUSG00000029084 | 0.013586   | 3.304224478 | Cd38          |
| ENSMUSG00000019880 | 0.025164  | 6.54391789  | Rspo3     | ENSMUSG00000022780 | 0.0111831  | 3.287987623 | Mfi2          |
| ENSMUSG00000030500 | 0.007562  | 6.332169725 | Slc17a6   | ENSMUSG00000034579 | 0.00071574 | 3.272619274 | Pla2g3        |
| ENSMUSG00000038094 | 0.007278  | 6.32620348  | Atp13a4   | ENSMUSG00000038775 | 0.04338261 | 3.271100566 | Vill          |
| ENSMUSG00000022197 | 0.029505  | 6.263902888 | Pdzd2     | ENSMUSG00000108175 | 0.03185226 | 3.270240587 | Gm43938       |
| ENSMUSG00000021099 | 0.021806  | 6.206992512 | Six6      | ENSMUSG00000074771 | 0.00577315 | 3.251882886 | Ankef1        |
| ENSMUSG00000047507 | 0.006447  | 6.058828984 | Baiap3    | ENSMUSG00000105942 | 0.03725476 | 3.249567741 | Gm43175       |
| ENSMUSG00000062393 | 0.031382  | 6.043970047 | Dgkq      | ENSMUSG00000012428 | 0.0099652  | 3.22927343  | Steap4        |
| ENSMUSG00000066720 | 0.043491  | 5.842124525 | Cldn9     | ENSMUSG00000028965 | 0.04609821 | 3.227845709 | Tnfrsf9       |
| ENSMUSG00000047021 | 0.018824  | 5.734614903 | Ccdc108   | ENSMUSG00000037686 | 0.00282479 | 3.21308237  | Aspg          |
| ENSMUSG00000029084 | 0.034423  | 5.701528954 | Cd38      | ENSMUSG00000028037 | 0.00095446 | 3.178055866 | Ifi44         |
| ENSMUSG00000024479 | 0.008738  | 5.61567748  | Mal2      | ENSMUSG00000019767 | 0.01010724 | 3.171690214 | Ccdc170       |
| ENSMUSG00000031558 | 0.006721  | 5.55842727  | Slit2     | ENSMUSG00000031725 | 0.01059303 | 3.153941153 | Ces1f         |
| ENSMUSG00000030889 | 0.012683  | 5.477338545 | Vva3a     | ENSMUSG00000035296 | 0.03893729 | 3.128173302 | Sgca          |
| ENSMUSG00000043913 | 0.01995   | 5.442216504 | Ccdc60    | ENSMUSG00000056380 | 0.00590961 | 3.117992804 | Gpr50         |
| ENSMUSG00000028927 | 0.005537  | 5.332014084 | Padi2     | ENSMUSG00000022665 | 0.00046497 | 3.087816992 | Ccdc80        |
| ENSMUSG00000042453 | 0.005537  | 5.311959981 | Reln      | ENSMUSG00000031075 | 0.00190514 | 3.086298915 | Ano1          |
| ENSMUSG00000031111 | 0.005537  | 5.303470377 | Igsf1     | ENSMUSG00000022949 | 0.01034743 | 3.084448163 | Clic6         |
| ENSMUSG00000059336 | 0.013018  | 5.259459929 | Slc14a1   | ENSMUSG00000040329 | 0.01767902 | 3.081655671 | Ii7           |
| ENSMUSG00000035896 | 0.034674  | 5.238766613 | Rnase1    | ENSMUSG00000059336 | 0.00040084 | 3.041741305 | Slc14a1       |

|                    |          |             |               |                     |            |             |          |
|--------------------|----------|-------------|---------------|---------------------|------------|-------------|----------|
| ENSMUSG00000059456 | 0.015568 | 5.210266383 | Ptk2b         | ENSMUSG00000093765  | 0.0087239  | 3.034016534 | Gm20658  |
| ENSMUSG00000037738 | 0.018982 | 5.191642038 | Nek5          | ENSMUSG00000026875  | 0.00039026 | 3.012476446 | Traf1    |
| ENSMUSG00000027171 | 0.049678 | 5.058120752 | Prrg4         | ENSMUSG00000046192  | 0.00353109 | 2.996099414 | Iqub     |
| ENSMUSG00000030898 | 0.014203 | 4.999423383 | Cckbr         | ENSMUSG00000037225  | 0.01044467 | 2.996082346 | Fgf2     |
| ENSMUSG00000040856 | 0.006724 | 4.961494868 | Dlk1          | ENSMUSG00000038094  | 0.00304482 | 2.991817797 | Atp13a4  |
| ENSMUSG00000030554 | 0.033866 | 4.959516343 | Synn          | ENSMUSG00000043020  | 0.00745392 | 2.988561534 | Wdr63    |
| ENSMUSG00000040998 | 0.046334 | 4.912162904 | Npnt          | ENSMUSG00000033207  | 0.00248102 | 2.986727825 | Mamdc2   |
| ENSMUSG00000056972 | 0.006563 | 4.890916889 | Magel2        | ENSMUSG00000036598  | 0.00284035 | 2.972964868 | Ccdc113  |
| ENSMUSG00000031786 | 0.014089 | 4.889898682 | Drc7          | ENSMUSG00000039899  | 0.00357008 | 2.960105415 | Fgl2     |
| ENSMUSG00000031980 | 0.004038 | 4.830066381 | Agt           | ENSMUSG00000085576  | 0.0203498  | 2.958956662 | Dpy19l2  |
| ENSMUSG00000079657 | 0.028732 | 4.784596754 | Rab26         | ENSMUSG00000108778  | 0.00299603 | 2.956184506 | Gm44670  |
| ENSMUSG00000020904 | 0.026267 | 4.758214489 | Cfap52        | ENSMUSG00000001604  | 0.0036063  | 2.954352314 | Tcea3    |
| ENSMUSG00000021763 | 0.035698 | 4.753305074 | BC067074      | ENSMUSG00000026380  | 0.00191591 | 2.929364949 | Tfcp2l1  |
| ENSMUSG00000043079 | 0.035698 | 4.751818294 | Synpo         | ENSMUSG00000032122  | 0.0038262  | 2.920250049 | Slc37a2  |
| ENSMUSG00000019852 | 0.038994 | 4.746928986 | Arfgef3       | ENSMUSG00000046688  | 0.001119   | 2.918993768 | Tifa     |
| ENSMUSG00000032356 | 0.006303 | 4.683627975 | Rasgrf1       | ENSMUSG00000034842  | 0.00345169 | 2.915251011 | Art3     |
| ENSMUSG00000058897 | 0.04664  | 4.669491813 | Col25a1       | ENSMUSG00000034486  | 0.02998029 | 2.906407745 | Gbx2     |
| ENSMUSG00000022103 | 0.011197 | 4.662601138 | Gfra2         | ENSMUSG00000034459  | 0.0006278  | 2.893075623 | Ifit1    |
| ENSMUSG00000038855 | 0.009835 | 4.627094865 | Itpkb         | ENSMUSG00000022805  | 0.00801776 | 2.891920033 | Maats1   |
| ENSMUSG00000041323 | 0.044133 | 4.577128716 | Ak7           | ENSMUSG00000031831  | 0.00483747 | 2.888140034 | Dnaaf1   |
| ENSMUSG00000044349 | 0.004038 | 4.555622985 | Snhg11        | ENSMUSG00000038745  | 0.03454128 | 2.882243182 | Nlrp6    |
| ENSMUSG00000050315 | 0.014203 | 4.522866907 | Synpo2        | ENSMUSG00000035783  | 0.00192927 | 2.878373154 | Acta2    |
| ENSMUSG00000032006 | 0.04664  | 4.490325863 | Pdgfd         | ENSMUSG00000042540  | 0.01117809 | 2.876072952 | Acot5    |
| ENSMUSG00000097348 | 0.021404 | 4.45199536  | Rmst          | ENSMUSG00000031639  | 0.03846909 | 2.874344428 | Tlr3     |
| ENSMUSG00000020334 | 0.008885 | 4.438231096 | Slc22a4       | ENSMUSG00000022146  | 0.00746768 | 2.863658743 | Osmr     |
| ENSMUSG00000019899 | 0.025214 | 4.423718176 | Lama2         | ENSMUSG00000067586  | 0.00040649 | 2.838993734 | S1pr3    |
| ENSMUSG00000018604 | 0.026267 | 4.392872349 | Tbx3          | ENSMUSG00000073409  | 0.00454845 | 2.838339923 | H2-Q6    |
| ENSMUSG00000019892 | 0.023461 | 4.377776924 | Lrrrip1       | ENSMUSG00000053025  | 0.03197787 | 2.83057322  | Sv2b     |
| ENSMUSG00000016918 | 0.011921 | 4.375915765 | Sulf1         | ENSMUSG00000033033  | 0.0138726  | 2.826612263 | Calhm2   |
| ENSMUSG00000030043 | 0.038416 | 4.275234504 | Tacr1         | ENSMUSG00000041842  | 0.00925865 | 2.815415112 | Fhdc1    |
| ENSMUSG00000020014 | 0.011214 | 4.264354382 | Cfap54        | ENSMUSG00000032000  | 0.02102618 | 2.809953619 | Birc3    |
| ENSMUSG00000041577 | 0.006721 | 4.259934574 | Prelp         | ENSMUSG00000006611  | 0.00072536 | 2.809422415 | Hfe      |
| ENSMUSG00000032841 | 0.008568 | 4.178713918 | Prr5l         | ENSMUSG000000109367 | 0.04362411 | 2.785765019 | Gm18782  |
| ENSMUSG00000028294 | 0.026943 | 4.178360361 | 1700003M02Rik | ENSMUSG00000045555  | 0.04896549 | 2.771159503 | Mettl24  |
| ENSMUSG00000066129 | 0.006721 | 4.158203199 | Kndc1         | ENSMUSG00000034570  | 0.00025915 | 2.767883817 | Inpp5j   |
| ENSMUSG00000027792 | 0.046334 | 4.13645984  | Bche          | ENSMUSG00000028270  | 0.00079245 | 2.762394451 | Gbp2     |
| ENSMUSG00000034855 | 0.013018 | 4.108924021 | Cxcl10        | ENSMUSG00000022676  | 0.03081018 | 2.756317178 | Snai2    |
| ENSMUSG00000051590 | 0.041234 | 4.095445757 | Map3k19       | ENSMUSG00000024107  | 0.00849479 | 2.756251797 | Lhcr     |
| ENSMUSG00000039126 | 0.009835 | 4.09205681  | Prune2        | ENSMUSG00000035948  | 0.005783   | 2.750904253 | Accs3    |
| ENSMUSG00000022025 | 0.038129 | 4.063234867 | Lect1         | ENSMUSG00000061740  | 0.04644014 | 2.749291007 | Cyp2d22  |
| ENSMUSG00000035653 | 0.021424 | 4.049758901 | Lrfn5         | ENSMUSG00000026637  | 0.03497302 | 2.736135508 | Traf5    |
| ENSMUSG00000057455 | 0.005537 | 4.042543316 | Rit2          | ENSMUSG00000029032  | 0.01273538 | 2.734216909 | Arhgef16 |
| ENSMUSG00000036598 | 0.034858 | 4.036057484 | Ccdc113       | ENSMUSG00000085251  | 0.02234526 | 2.726578801 | Gm12326  |
| ENSMUSG00000039552 | 0.022556 | 4.015795726 | Rsph4a        | ENSMUSG00000046242  | 0.03278511 | 2.723921973 | Nme9     |
| ENSMUSG00000071398 | 0.014836 | 4.009469717 | 2410004P03Rik | ENSMUSG00000026387  | 0.01456621 | 2.71954927  | Sctr     |
| ENSMUSG00000036480 | 0.013018 | 3.934327357 | Prss56        | ENSMUSG00000022262  | 0.00900225 | 2.714509572 | Dnah5    |
| ENSMUSG00000026650 | 0.011197 | 3.910402933 | Meig1         | ENSMUSG00000024164  | 0.01815307 | 2.699082898 | C3       |
| ENSMUSG00000050711 | 0.004038 | 3.907312981 | Scg2          | ENSMUSG00000039116  | 0.00267377 | 2.689151189 | Adgrg6   |
| ENSMUSG00000019888 | 0.030598 | 3.878013774 | Mgat4c        | ENSMUSG00000066058  | 0.01819837 | 2.68329454  | Cldn19   |
| ENSMUSG00000028270 | 0.032239 | 3.870257295 | Gbp2          | ENSMUSG00000027400  | 0.00339108 | 2.678467188 | Pdyn     |
| ENSMUSG00000046192 | 0.027668 | 3.857224746 | Iqub          | ENSMUSG00000067219  | 0.04880371 | 2.667436168 | Nipa1    |
| ENSMUSG00000028528 | 0.015204 | 3.821795754 | Dnajc6        | ENSMUSG00000028364  | 0.00891792 | 2.666381574 | Tnc      |
| ENSMUSG00000033061 | 0.014097 | 3.812343384 | Resp18        | ENSMUSG00000030889  | 0.00287794 | 2.656056521 | Vwa3a    |
| ENSMUSG00000045394 | 0.038685 | 3.79225066  | Epcam         | ENSMUSG00000032514  | 0.00260328 | 2.653205535 | Ttc21a   |
| ENSMUSG00000039904 | 0.005537 | 3.763259145 | Gpr37         | ENSMUSG00000041828  | 0.02249872 | 2.652740149 | Abca8a   |
| ENSMUSG00000068617 | 0.006563 | 3.757334627 | Efcab1        | ENSMUSG00000032841  | 0.001669   | 2.652101743 | Prr5l    |
| ENSMUSG00000102543 | 0.026926 | 3.744783588 | Pcdhgc5       | ENSMUSG00000034209  | 0.03222964 | 2.650337137 | Rasl10a  |
| ENSMUSG00000020620 | 0.038146 | 3.725494377 | Abca8b        | ENSMUSG00000074896  | 0.00022464 | 2.646973613 | Ifit3    |
| ENSMUSG00000019027 | 0.015568 | 3.695542779 | Dnah1         | ENSMUSG00000041577  | 0.00053853 | 2.644399464 | Prelp    |
| ENSMUSG00000021779 | 0.026926 | 3.653937975 | Thrb          | ENSMUSG00000058831  | 0.02885984 | 2.641784578 | Opn1sw   |
| ENSMUSG00000050875 | 0.007961 | 3.638285595 | A730017C20Rik | ENSMUSG00000028159  | 0.00191591 | 2.638135958 | Dapp1    |
| ENSMUSG00000029309 | 0.006721 | 3.62105031  | Sparcl1       | ENSMUSG00000025993  | 0.02825556 | 2.638105105 | Slc40a1  |
| ENSMUSG00000033717 | 0.016817 | 3.612497933 | Adra2a        | ENSMUSG00000037143  | 0.00837206 | 2.629415863 | Cfap61   |
| ENSMUSG00000045827 | 0.014896 | 3.593674614 | Serpina9      | ENSMUSG00000032380  | 0.00061578 | 2.627178501 | Dapk2    |
| ENSMUSG00000026185 | 0.004038 | 3.587860979 | lgfbp5        | ENSMUSG00000028497  | 0.00062463 | 2.625628789 | Hacd4    |
| ENSMUSG00000050967 | 0.023452 | 3.587208125 | Creg2         | ENSMUSG00000022376  | 0.00103331 | 2.620586974 | Adcy8    |
| ENSMUSG00000019256 | 0.033698 | 3.581792782 | Ahr           | ENSMUSG00000031379  | 0.00332524 | 2.610351341 | Pir      |
| ENSMUSG00000027878 | 0.014937 | 3.572086817 | Notch2        | ENSMUSG00000038526  | 0.00571449 | 2.605362132 | Car14    |
| ENSMUSG00000048960 | 0.018581 | 3.571571382 | Prex2         | ENSMUSG00000045613  | 0.03442622 | 2.592394794 | Chrm2    |
| ENSMUSG00000027188 | 0.007278 | 3.568845346 | Pamr1         | ENSMUSG00000086596  | 0.02312817 | 2.58744162  | Susd5    |
| ENSMUSG00000033361 | 0.021994 | 3.555242007 | Prrg3         | ENSMUSG00000059049  | 0.02283965 | 2.586838964 | Frem1    |
| ENSMUSG00000072663 | 0.026269 | 3.534445794 | Spef2         | ENSMUSG00000026676  | 0.0378318  | 2.582984099 | Ccdc3    |
| ENSMUSG00000055409 | 0.028702 | 3.503289082 | Nell1         | ENSMUSG00000038840  | 0.02766171 | 2.58160675  | Birc7    |
| ENSMUSG00000030708 | 0.046109 | 3.485717316 | Dnajb13       | ENSMUSG00000062488  | 0.00118664 | 2.575291583 | Ifit3b   |
| ENSMUSG00000029088 | 0.032176 | 3.435557658 | Kcnp4         | ENSMUSG00000029371  | 0.00186278 | 2.572966432 | Cxcl5    |

|                    |          |             |               |                     |            |             |               |
|--------------------|----------|-------------|---------------|---------------------|------------|-------------|---------------|
| ENSMUSG00000040543 | 0.038994 | 3.42391281  | Pitpnm3       | ENSMUSG00000036949  | 0.00115906 | 2.567931925 | Slc39a12      |
| ENSMUSG00000027347 | 0.023542 | 3.427551408 | Rasgrp1       | ENSMUSG00000039391  | 0.01068942 | 2.564777964 | Ccdc81        |
| ENSMUSG00000025537 | 0.023452 | 3.421778623 | Phkg1         | ENSMUSG00000026874  | 0.02654834 | 2.562582803 | Hc            |
| ENSMUSG00000073650 | 0.028145 | 3.412475308 | Catip         | ENSMUSG00000086006  | 0.00335931 | 2.561131385 | Gm13293       |
| ENSMUSG00000032489 | 0.034732 | 3.359195095 | Kif9          | ENSMUSG00000061298  | 0.02026938 | 2.556546523 | Agbl4         |
| ENSMUSG00000030862 | 0.037375 | 3.3508897   | Cpxm2         | ENSMUSG00000027875  | 0.00041702 | 2.55208559  | Hmgcs2        |
| ENSMUSG00000040118 | 0.038685 | 3.34528413  | Cacna2d1      | ENSMUSG00000021090  | 0.00113203 | 2.544941743 | Lrrc9         |
| ENSMUSG00000052942 | 0.022855 | 3.341078422 | Glis3         | ENSMUSG00000030235  | 0.00060814 | 2.544907811 | Slco1c1       |
| ENSMUSG00000021750 | 0.039746 | 3.327522158 | Fam107a       | ENSMUSG00000027070  | 0.01623261 | 2.543287256 | Lrp2          |
| ENSMUSG00000006711 | 0.02735  | 3.309442421 | D130043K22Rik | ENSMUSG000000104713 | 0.0084246  | 2.529521525 | Gbp6          |
| ENSMUSG00000039543 | 0.038136 | 3.304120694 | Cfap70        | ENSMUSG00000036353  | 0.00792031 | 2.52442739  | P2ry12        |
| ENSMUSG00000063564 | 0.026926 | 3.296801159 | Col23a1       | ENSMUSG00000020473  | 0.00168476 | 2.524148601 | Aebp1         |
| ENSMUSG00000027400 | 0.034068 | 3.294309989 | Pdyn          | ENSMUSG00000035394  | 0.02373004 | 2.519420172 | Cfap53        |
| ENSMUSG00000022665 | 0.014203 | 3.284365786 | Ccdc80        | ENSMUSG00000025355  | 0.01011059 | 2.513591702 | Mmp19         |
| ENSMUSG00000039372 | 0.045707 | 3.268343573 | 42433         | ENSMUSG00000020911  | 0.00878564 | 2.511987328 | Krt19         |
| ENSMUSG00000026679 | 0.034068 | 3.264669436 | Enkur         | ENSMUSG00000047671  | 0.01189286 | 2.511078155 | Tctex1d4      |
| ENSMUSG00000015243 | 0.005537 | 3.244213312 | Abca1         | ENSMUSG00000078161  | 0.001669   | 2.510025494 | Erich3        |
| ENSMUSG00000028159 | 0.007292 | 3.242477697 | Dapp1         | ENSMUSG00000044734  | 0.00065819 | 2.505554881 | Serpincb1a    |
| ENSMUSG00000037627 | 0.036789 | 3.23164148  | Rgs22         | ENSMUSG00000102543  | 0.00891792 | 2.504275669 | Pcdhgc5       |
| ENSMUSG00000069833 | 0.011197 | 3.222571521 | Ahnak         | ENSMUSG00000030862  | 0.00091505 | 2.498447013 | Cpxm2         |
| ENSMUSG00000029330 | 0.038481 | 3.216657103 | Cds1          | ENSMUSG00000005360  | 0.0004524  | 2.489626098 | Slc1a3        |
| ENSMUSG00000049154 | 0.02257  | 3.211305849 | Fam183b       | ENSMUSG00000036304  | 0.03553012 | 2.484285105 | Zdhhc23       |
| ENSMUSG00000019817 | 0.026267 | 3.196310862 | Plagl1        | ENSMUSG00000057969  | 0.00345632 | 2.481980702 | Sema3b        |
| ENSMUSG00000027676 | 0.028732 | 3.189882205 | Ccdc39        | ENSMUSG00000036834  | 0.01539272 | 2.480271855 | Plch1         |
| ENSMUSG00000025348 | 0.032762 | 3.186492513 | Itga7         | ENSMUSG00000051497  | 0.00797598 | 2.479813604 | Kcnj16        |
| ENSMUSG00000040978 | 0.042004 | 3.184821126 | Gm11992       | ENSMUSG00000019785  | 0.01042287 | 2.478947589 | Civs2         |
| ENSMUSG00000027858 | 0.016458 | 3.182654914 | Tspan2        | ENSMUSG00000001870  | 0.03228758 | 2.471137567 | Ltbp1         |
| ENSMUSG00000046093 | 0.006563 | 3.173025444 | Hpcal4        | ENSMUSG00000043631  | 0.03468868 | 2.463805363 | Ecm2          |
| ENSMUSG00000042793 | 0.039434 | 3.170476372 | Lgr6          | ENSMUSG00000027015  | 0.00392425 | 2.463408546 | Cybrd1        |
| ENSMUSG00000039629 | 0.049883 | 3.169683177 | Strip2        | ENSMUSG00000040483  | 0.00188956 | 2.449296702 | Xaf1          |
| ENSMUSG00000028150 | 0.041234 | 3.161717404 | Rorc          | ENSMUSG00000020607  | 0.00014929 | 2.447285138 | Fam84a        |
| ENSMUSG00000030089 | 0.025214 | 3.122653738 | Slc41a3       | ENSMUSG00000027661  | 0.00087352 | 2.444686741 | Slc2a10       |
| ENSMUSG00000015396 | 0.044277 | 3.10941893  | Cd83          | ENSMUSG00000039720  | 0.03021956 | 2.442388733 | Got111        |
| ENSMUSG00000027220 | 0.027668 | 3.081237498 | Syt13         | ENSMUSG00000020904  | 0.00329045 | 2.439371208 | Cfap52        |
| ENSMUSG00000029095 | 0.029505 | 3.080656003 | Ablim2        | ENSMUSG00000050103  | 0.00924829 | 2.435244966 | Agmo          |
| ENSMUSG00000027875 | 0.012233 | 3.079726734 | Hmgcs2        | ENSMUSG00000021638  | 0.01572527 | 2.432009098 | Ocln          |
| ENSMUSG00000031373 | 0.028732 | 3.056960226 | Car5b         | ENSMUSG00000019892  | 0.00456679 | 2.428381501 | Lrriq1        |
| ENSMUSG00000053111 | 0.036097 | 3.051766276 | Fank1         | ENSMUSG00000072568  | 0.00580458 | 2.426622761 | Fam84b        |
| ENSMUSG00000028497 | 0.036744 | 3.050098294 | Hacd4         | ENSMUSG00000087075  | 0.02393816 | 2.417509784 | A230065H16Rik |
| ENSMUSG0000004952  | 0.043475 | 3.0275006   | Rasa4         | ENSMUSG00000079014  | 0.03885884 | 2.416076285 | Serpina3i     |
| ENSMUSG00000037259 | 0.017211 | 3.021721737 | Dzank1        | ENSMUSG00000087150  | 0.00286345 | 2.411533191 | BC064078      |
| ENSMUSG00000030551 | 0.014896 | 3.011766524 | Nr2f2         | ENSMUSG00000031297  | 0.00047616 | 2.409857123 | Slc7a3        |
| ENSMUSG00000036502 | 0.012179 | 3.002607797 | Tmem255a      | ENSMUSG00000015533  | 0.03105082 | 2.402032995 | Itga2         |
| ENSMUSG00000030905 | 0.006054 | 3.001921674 | Crym          | ENSMUSG00000019851  | 0.01008005 | 2.395666454 | Perp          |
| ENSMUSG00000020806 | 0.039811 | 2.996627457 | Rhbdf2        | ENSMUSG00000026173  | 0.00047616 | 2.391325109 | Plcd4         |
| ENSMUSG00000071103 | 0.026926 | 2.964139386 | 1700029J07Rik | ENSMUSG00000021091  | 6.6193E-05 | 2.391286497 | Serpina3n     |
| ENSMUSG00000035126 | 0.028732 | 2.960963514 | Wdr78         | ENSMUSG00000019256  | 0.03214983 | 2.389207539 | Ahr           |
| ENSMUSG00000078161 | 0.027668 | 2.960697406 | Erich3        | ENSMUSG00000048065  | 0.00574293 | 2.389010214 | Cyb5r2        |
| ENSMUSG00000035179 | 0.043972 | 2.956473589 | Ppp1r32       | ENSMUSG00000025350  | 0.00156218 | 2.388304323 | Rdh5          |
| ENSMUSG00000068762 | 0.026267 | 2.937954541 | Gstm6         | ENSMUSG00000029298  | 0.03820727 | 2.38796016  | Gbp9          |
| ENSMUSG00000026204 | 0.037885 | 2.922166758 | Ptpn          | ENSMUSG00000035472  | 0.0062189  | 2.386717761 | Slc25a21      |
| ENSMUSG0000003849  | 0.019552 | 2.917143147 | Nqo1          | ENSMUSG00000021791  | 0.04932664 | 2.386077014 | Dydc2         |
| ENSMUSG00000053702 | 0.012919 | 2.878938189 | Neb1          | ENSMUSG00000068617  | 0.00058965 | 2.38527904  | Efcab1        |
| ENSMUSG00000021091 | 0.006721 | 2.866151335 | Serpina3n     | ENSMUSG00000026546  | 0.00361385 | 2.38285191  | Cfap45        |
| ENSMUSG00000045761 | 0.020544 | 2.865416855 | Fam179a       | ENSMUSG0000004951   | 0.02974212 | 2.382046037 | Hspb1         |
| ENSMUSG00000010803 | 0.035698 | 2.86524534  | Gabra1        | ENSMUSG00000037921  | 0.00593092 | 2.379752284 | Ddx60         |
| ENSMUSG00000021069 | 0.031522 | 2.856283949 | Pygl          | ENSMUSG00000028885  | 0.00292564 | 2.374821735 | Adgre5        |
| ENSMUSG00000034463 | 0.038428 | 2.852194235 | Scara3        | ENSMUSG00000045761  | 0.00099695 | 2.373000638 | Fam179a       |
| ENSMUSG00000096054 | 0.014089 | 2.845511109 | Syne1         | ENSMUSG00000028864  | 0.03737004 | 2.364888314 | Hgf           |
| ENSMUSG00000010136 | 0.038258 | 2.840788751 | Pifo          | ENSMUSG00000048029  | 0.00192927 | 2.364825291 | Eno4          |
| ENSMUSG00000066026 | 0.049169 | 2.838733433 | Dhrs3         | ENSMUSG00000032596  | 0.0054463  | 2.363796182 | Uba7          |
| ENSMUSG00000027737 | 0.014089 | 2.808509519 | Slc7a11       | ENSMUSG00000015568  | 0.00207093 | 2.363452432 | Lpl           |
| ENSMUSG00000040624 | 0.020827 | 2.776867491 | Plekhh1       | ENSMUSG00000000167  | 0.00577439 | 2.361993674 | Pih1d2        |
| ENSMUSG00000041548 | 0.014836 | 2.769020399 | Hspb8         | ENSMUSG00000061723  | 0.01294192 | 2.356328125 | Tnnt3         |
| ENSMUSG00000017009 | 0.008446 | 2.729997079 | Sdc4          | ENSMUSG00000037101  | 0.00854245 | 2.351937944 | Ttc29         |
| ENSMUSG00000038112 | 0.011197 | 2.727361432 | AW551984      | ENSMUSG00000031111  | 0.00122666 | 2.348435772 | Igsf1         |
| ENSMUSG00000000308 | 0.030933 | 2.721944113 | Ckmt1         | ENSMUSG00000021280  | 0.02053813 | 2.34840989  | Exoc3l4       |
| ENSMUSG00000020932 | 0.006303 | 2.716856234 | Gfap          | ENSMUSG00000039519  | 0.00036547 | 2.344259848 | Cyp7b1        |
| ENSMUSG00000029120 | 0.026926 | 2.716614014 | Ppp2r2c       | ENSMUSG00000022758  | 0.0008342  | 2.342730325 | P2rx6         |
| ENSMUSG00000033685 | 0.021657 | 2.714591434 | Ucp2          | ENSMUSG00000027956  | 0.03711628 | 2.337921241 | Tmem144       |
| ENSMUSG00000018593 | 0.006721 | 2.711243053 | Sparc         | ENSMUSG00000055172  | 0.04962504 | 2.337660353 | C1ra          |
| ENSMUSG00000036949 | 0.01956  | 2.706636615 | Slc39a12      | ENSMUSG00000039851  | 0.01171148 | 2.337654532 | 4932438H23Rik |
| ENSMUSG00000000266 | 0.029505 | 2.703847619 | Mid2          | ENSMUSG00000073424  | 0.0006278  | 2.3347402   | Cyp4f15       |
| ENSMUSG00000030123 | 0.042499 | 2.702660916 | Plxnd1        | ENSMUSG00000031786  | 0.00118664 | 2.332275427 | Drc7          |
| ENSMUSG00000003354 | 0.048757 | 2.699642942 | Ccdc65        | ENSMUSG000000107667 | 0.0135434  | 2.331573102 | C530044C16Rik |

|                     |          |             |               |                    |            |              |               |
|---------------------|----------|-------------|---------------|--------------------|------------|--------------|---------------|
| ENSMUSG00000055137  | 0.033698 | 2.69637869  | Sugct         | ENSMUSG00000037762 | 0.00813616 | 2.331518791  | Slc16a9       |
| ENSMUSG00000032377  | 0.030749 | 2.690843587 | Plscr4        | ENSMUSG00000027386 | 0.00403406 | 2.326598969  | Fbln7         |
| ENSMUSG00000024521  | 0.041072 | 2.689027734 | Pmaip1        | ENSMUSG00000038508 | 0.002961   | 2.323199664  | Gdf15         |
| ENSMUSG00000073102  | 0.014641 | 2.67945279  | Drc1          | ENSMUSG00000016918 | 0.01523335 | 2.320843956  | Sulf1         |
| ENSMUSG00000036395  | 0.039434 | 2.677243862 | Glb1l2        | ENSMUSG00000032489 | 0.00248102 | 2.320745153  | Kif9          |
| ENSMUSG00000020599  | 0.035698 | 2.66704626  | Rgs9          | ENSMUSG00000044033 | 0.00353043 | 2.31947266   | Ccdc141       |
| ENSMUSG00000067276  | 0.047339 | 2.665455939 | Capn6         | ENSMUSG00000035208 | 0.02358541 | 2.314111865  | Sifn8         |
| ENSMUSG00000022758  | 0.036097 | 2.663776167 | P2rx6         | ENSMUSG00000026483 | 0.01011548 | 2.313707847  | Fam129a       |
| ENSMUSG00000059970  | 0.013587 | 2.660138136 | Hspa2         | ENSMUSG00000020014 | 0.00376364 | 2.313028907  | Cfap54        |
| ENSMUSG00000017740  | 0.032239 | 2.657361017 | Slc12a5       | ENSMUSG00000026650 | 0.00283236 | 2.311739742  | Meig1         |
| ENSMUSG00000041309  | 0.040285 | 2.640568156 | Nkx6-2        | ENSMUSG00000104117 | 0.00577439 | 2.310214427  | Gm20743       |
| ENSMUSG00000030208  | 0.034068 | 2.634340422 | Emp1          | ENSMUSG00000060519 | 0.00047616 | 2.309915902  | Tor3a         |
| ENSMUSG00000027520  | 0.022379 | 2.630998235 | Zdbf2         | ENSMUSG00000050777 | 0.00284113 | 2.308104147  | Tmem37        |
| ENSMUSG00000075318  | 0.038685 | 2.622053437 | Scn2a1        | ENSMUSG00000040219 | 0.00135478 | 2.307030365  | Ttc12         |
| ENSMUSG00000006567  | 0.032239 | 2.618158255 | Atp7b         | ENSMUSG00000109598 | 0.0397401  | 2.304470032  | RP23-226C6.3  |
| ENSMUSG00000024186  | 0.047339 | 2.6180425   | Rgs11         | ENSMUSG00000068196 | 0.04230715 | 2.303383726  | Col8a1        |
| ENSMUSG00000047013  | 0.033362 | 2.615049498 | Fbxo41        | ENSMUSG00000039676 | 0.00382105 | 2.302925236  | Capsl         |
| ENSMUSG00000039706  | 0.019552 | 2.614261186 | Ldb2          | ENSMUSG00000025348 | 0.00099695 | 2.300087711  | Itga7         |
| ENSMUSG00000028364  | 0.016674 | 2.609045216 | Tnc           | ENSMUSG00000038058 | 0.04478279 | 2.29931744   | Nod1          |
| ENSMUSG00000002265  | 0.028761 | 2.60667137  | Peg3          | ENSMUSG00000006567 | 0.02449884 | 2.298032005  | Atp7b         |
| ENSMUSG00000022783  | 0.034858 | 2.600902311 | Spag6         | ENSMUSG00000034853 | 0.00298869 | 2.297647786  | Acot11        |
| ENSMUSG00000090122  | 0.008446 | 2.581776325 | Kcne1l        | ENSMUSG00000039632 | 0.01625976 | 2.296764763  | Ccdc151       |
| ENSMUSG00000059325  | 0.034068 | 2.580700889 | Hopx          | ENSMUSG00000040181 | 0.00050141 | 2.289957775  | Fmo1          |
| ENSMUSG00000027217  | 0.033362 | 2.579310124 | Tspan18       | ENSMUSG00000051048 | 0.00058965 | 2.28736154   | P4ha3         |
| ENSMUSG00000026831  | 0.035695 | 2.576845242 | 1700007K13Rik | ENSMUSG00000038233 | 0.00581749 | 2.286445548  | Fam198a       |
| ENSMUSG00000035578  | 0.01995  | 2.574840504 | Iqcg          | ENSMUSG00000029343 | 0.01090988 | 2.285682155  | Crybb1        |
| ENSMUSG00000063704  | 0.036097 | 2.573741836 | Mapk15        | ENSMUSG00000064179 | 0.03582646 | 2.284721003  | Tnnt1         |
| ENSMUSG00000022146  | 0.029966 | 2.571704826 | Osmr          | ENSMUSG00000020773 | 0.00248102 | 2.283611123  | Trim47        |
| ENSMUSG00000023328  | 0.036015 | 2.561855235 | Ache          | ENSMUSG00000090439 | 0.00337597 | 2.282994175  | Gm17455       |
| ENSMUSG00000026586  | 0.033048 | 2.557667878 | Prrx1         | ENSMUSG00000030921 | 0.0366907  | 2.278767874  | Trim30a       |
| ENSMUSG00000014361  | 0.036312 | 2.55724933  | Mertk         | ENSMUSG00000068299 | 0.00129716 | 2.276473693  | Nat8f4        |
| ENSMUSG00000022309  | 0.038051 | 2.555359152 | Angpt1        | ENSMUSG00000037405 | 0.00472487 | 2.275891146  | Icam1         |
| ENSMUSG00000040848  | 0.044133 | 2.554106786 | Sft2d2        | ENSMUSG00000027962 | 0.00248102 | 2.274976657  | Vcam1         |
| ENSMUSG00000068566  | 0.018982 | 2.553439571 | Myadm         | ENSMUSG00000006522 | 0.00118194 | 2.273466238  | Itih3         |
| ENSMUSG00000021281  | 0.039434 | 2.551737649 | Tnfaip2       | ENSMUSG00000079494 | 0.01088098 | 2.270355325  | Nat8f5        |
| ENSMUSG00000044667  | 0.021775 | 2.551667967 | Lppr4         | ENSMUSG00000031980 | 0.00018341 | 2.268970196  | Agt           |
| ENSMUSG00000025780  | 0.030496 | 2.542995555 | Itih5         | ENSMUSG00000031027 | 0.02288949 | 2.268741989  | Stk33         |
| ENSMUSG000000074227 | 0.039222 | 2.524321501 | Spint2        | ENSMUSG00000050315 | 0.00224012 | 2.264994151  | Synpo2        |
| ENSMUSG00000000058  | 0.034068 | 2.519601162 | Cav2          | ENSMUSG00000056752 | 0.00555217 | 2.264478426  | Dnah9         |
| ENSMUSG00000027087  | 0.035698 | 2.50813991  | Itgav         | ENSMUSG00000026686 | 0.0210248  | 2.261396833  | Lmx1a         |
| ENSMUSG00000019820  | 0.026926 | 2.506574399 | Utrn          | ENSMUSG00000021613 | 0.01320482 | 2.260804502  | Hapln1        |
| ENSMUSG00000026667  | 0.020377 | 2.501364953 | Uhmk1         | ENSMUSG00000030966 | 0.04180357 | 2.255500019  | Trim21        |
| ENSMUSG00000028167  | 0.046868 | 2.4945985   | Bdh2          | ENSMUSG00000034463 | 0.00040649 | 2.254782687  | Scara3        |
| ENSMUSG00000062488  | 0.035694 | 2.48276497  | Ifit3b        | ENSMUSG00000031387 | 0.001669   | 2.254761166  | Rembp         |
| ENSMUSG00000043388  | 0.026782 | 2.478653219 | Tmem130       | ENSMUSG00000039063 | 0.02607314 | 2.253174425  | Echdc3        |
| ENSMUSG00000025092  | 0.040834 | 2.475601352 | Hspa12a       | ENSMUSG00000038449 | 0.0007834  | 2.251297319  | Nqo1          |
| ENSMUSG00000003746  | 0.040726 | 2.475323562 | Man1a         | ENSMUSG00000024552 | 0.00070584 | 2.250055079  | Slc14a2       |
| ENSMUSG00000050199  | 0.032176 | 2.469359229 | Lgr4          | ENSMUSG00000026301 | 0.00659589 | 2.249321216  | Iqca          |
| ENSMUSG00000032743  | 0.047822 | 2.46886181  | D430042O09Rik | ENSMUSG00000025666 | 0.00418899 | 2.248376258  | Tmem47        |
| ENSMUSG00000032735  | 0.024972 | 2.468049687 | Ablim3        | ENSMUSG00000033880 | 0.00042528 | 2.244204917  | Lgals3bp      |
| ENSMUSG00000015085  | 0.011725 | 2.465928873 | Entpd2        | ENSMUSG00000041771 | 0.02373756 | 2.243844985  | Slc24a4       |
| ENSMUSG00000005125  | 0.040834 | 2.463663462 | Ndrp1         | ENSMUSG00000071398 | 0.00081225 | 2.243082282  | 2410004P03Rik |
| ENSMUSG00000040189  | 0.034466 | 2.463540215 | Ccdc114       | ENSMUSG00000055809 | 0.00769378 | 2.242552816  | Dnaaf3        |
| ENSMUSG00000026944  | 0.022135 | 2.456240087 | Abca2         | ENSMUSG00000024610 | 0.011359   | 2.241083961  | Cd74          |
| ENSMUSG00000031274  | 0.026267 | 2.45591335  | Col4a5        | ENSMUSG00000028015 | 0.001669   | 2.240616317  | Ctso          |
| ENSMUSG00000021340  | 0.028732 | 2.439784822 | Gpld1         | ENSMUSG00000060512 | 0.00183304 | 2.236047224  | 0610040J01Rik |
| ENSMUSG00000026042  | 0.017603 | 2.433071488 | Col5a2        | ENSMUSG00000045655 | 0.00348316 | 2.233370845  | Fam216b       |
| ENSMUSG00000040936  | 0.044277 | 2.414080072 | Ulk4          | ENSMUSG00000056870 | 0.02752445 | 2.23290873   | Gulp1         |
| ENSMUSG00000074896  | 0.038054 | 2.410808291 | Ifit3         | ENSMUSG00000040253 | 0.00144736 | 2.23258004   | Gbp7          |
| ENSMUSG00000049313  | 0.01995  | 2.404148186 | Sorl1         | ENSMUSG00000032902 | 0.00261392 | 2.232434407  | Slc16a1       |
| ENSMUSG0000007908   | 0.038054 | 2.399393432 | Hmgcl1        | ENSMUSG00000069874 | 0.02448269 | 2.23099423   | Irgm2         |
| ENSMUSG00000006611  | 0.029505 | 2.395396607 | Hfe           | ENSMUSG00000047361 | 0.0033701  | 2.230173627  | Gm973         |
| ENSMUSG00000006435  | 0.024126 | 2.388713397 | Neurl1a       | ENSMUSG00000030170 | 0.02823485 | 2.229949667  | Wnt5b         |
| ENSMUSG00000024411  | 0.021848 | 2.387748639 | Aqp4          | ENSMUSG00000027676 | 0.00228718 | 2.225076277  | Ccdc39        |
| ENSMUSG00000021451  | 0.018999 | 2.385841514 | Sema4d        | ENSMUSG00000085316 | 0.01008005 | 2.224837301  | D330050G23Rik |
| ENSMUSG00000046182  | 0.034068 | 2.379662057 | Gsg1l         | ENSMUSG00000073102 | 0.001669   | 2.224167073  | Drc1          |
| ENSMUSG00000022055  | 0.028761 | 2.368356537 | Nefl          | ENSMUSG00000030708 | 0.00138815 | 2.212982754  | Dnajb13       |
| ENSMUSG00000051497  | 0.03685  | 2.361659769 | Kcnj16        | ENSMUSG00000028753 | 0.00764139 | 2.211980159  | Vwa5b1        |
| ENSMUSG00000039911  | 0.038685 | 2.360944771 | Spsb1         | ENSMUSG00000041143 | 0.00218929 | 2.211601882  | Tmco4         |
| ENSMUSG00000071424  | 0.042004 | 2.353237226 | Grid2         | ENSMUSG00000038521 | 0.03409088 | 2.2104815993 | C1s1          |
| ENSMUSG00000039007  | 0.022756 | 2.350043166 | Cpq           | ENSMUSG00000024593 | 0.02512885 | 2.203414975  | Megf10        |
| ENSMUSG00000040612  | 0.023462 | 2.342435575 | Ildr2         | ENSMUSG00000027188 | 0.00406795 | 2.198926372  | Pamr1         |
| ENSMUSG00000024778  | 0.04664  | 2.338660387 | Fas           | ENSMUSG00000025537 | 0.00091505 | 2.198018526  | Phkg1         |
| ENSMUSG0000002475   | 0.03131  | 2.334379448 | Abhd3         | ENSMUSG00000039963 | 0.04221989 | 2.196919406  | Ccdc40        |
| ENSMUSG00000021583  | 0.021806 | 2.333499765 | Erap1         | ENSMUSG00000052911 | 0.00272778 | 2.193263073  | Lamb2         |

|                    |          |             |               |                    |            |             |               |
|--------------------|----------|-------------|---------------|--------------------|------------|-------------|---------------|
| ENSMUSG00000026672 | 0.028145 | 2.327187366 | Optrn         | ENSMUSG00000097877 | 0.02945507 | 2.189261637 | Gm26703       |
| ENSMUSG00000055078 | 0.034068 | 2.326752184 | Gabra5        | ENSMUSG00000034855 | 0.00079148 | 2.188100462 | Cxcl10        |
| ENSMUSG00000037405 | 0.036015 | 2.326737061 | Icam1         | ENSMUSG00000084989 | 0.02647591 | 2.187375059 | Crocc2        |
| ENSMUSG00000038530 | 0.021424 | 2.323176598 | Rgs4          | ENSMUSG00000073418 | 0.00188956 | 2.186867787 | C4b           |
| ENSMUSG00000092274 | 0.038416 | 2.318489097 | Neat1         | ENSMUSG00000060176 | 0.00820249 | 2.183631889 | Kif27         |
| ENSMUSG00000059182 | 0.036097 | 2.313055595 | Skap2         | ENSMUSG00000087380 | 0.02908623 | 2.183321838 | 221040F21Rik  |
| ENSMUSG00000036745 | 0.040779 | 2.310570729 | Ttl17         | ENSMUSG00000024818 | 0.00741036 | 2.183138126 | Slc25a45      |
| ENSMUSG00000049044 | 0.046338 | 2.30660337  | Rapgef4       | ENSMUSG00000042784 | 0.0387476  | 2.180932635 | Muc1          |
| ENSMUSG00000071604 | 0.032239 | 2.29652165  | Fam189a2      | ENSMUSG00000086515 | 0.04466755 | 2.179737641 | Erich2os      |
| ENSMUSG00000030761 | 0.043005 | 2.290789572 | Myo7a         | ENSMUSG00000024338 | 0.00385188 | 2.17780134  | Psmb8         |
| ENSMUSG00000029086 | 0.031708 | 2.279042574 | Prom1         | ENSMUSG00000073650 | 0.00598856 | 2.177350723 | Catip         |
| ENSMUSG00000026202 | 0.040834 | 2.278204277 | Tuba4a        | ENSMUSG00000023999 | 0.01353649 | 2.177345662 | Kif6          |
| ENSMUSG00000040181 | 0.036097 | 2.258883079 | Fmo1          | ENSMUSG00000052560 | 0.0072865  | 2.175519481 | Cpne8         |
| ENSMUSG00000022565 | 0.018581 | 2.255725673 | Plec          | ENSMUSG00000027702 | 0.0113081  | 2.17382766  | Lrrc34        |
| ENSMUSG00000025350 | 0.034674 | 2.252015865 | Rdh5          | ENSMUSG00000027737 | 0.00248102 | 2.173663768 | Slc7a11       |
| ENSMUSG00000073418 | 0.039434 | 2.241946182 | C4b           | ENSMUSG00000014361 | 0.03600915 | 2.173529023 | Mertk         |
| ENSMUSG00000014846 | 0.015568 | 2.241451031 | Tppp3         | ENSMUSG00000032679 | 0.00671943 | 2.173258415 | Cd59a         |
| ENSMUSG00000050953 | 0.038129 | 2.238700132 | Gja1          | ENSMUSG00000091415 | 0.0382905  | 2.171122216 | Ak9           |
| ENSMUSG00000039239 | 0.021424 | 2.238342574 | Tgfb2         | ENSMUSG00000036395 | 0.00795475 | 2.165495311 | Glb1l2        |
| ENSMUSG00000031451 | 0.012729 | 2.216758141 | Gas6          | ENSMUSG00000075569 | 0.00996419 | 2.15975791  | Rsph10b       |
| ENSMUSG00000019590 | 0.041927 | 2.211065678 | Cyb561        | ENSMUSG00000026226 | 0.01438179 | 2.159265554 | Spata3        |
| ENSMUSG00000038860 | 0.035453 | 2.184817006 | Garnl3        | ENSMUSG00000023224 | 0.00287694 | 2.158941733 | Serping1      |
| ENSMUSG00000097451 | 0.03899  | 2.16301292  | Rian          | ENSMUSG00000008540 | 0.00072536 | 2.152044423 | Mgst1         |
| ENSMUSG0000006301  | 0.023856 | 2.147907488 | Tmbim1        | ENSMUSG00000024206 | 0.00139847 | 2.150745615 | Rfx2          |
| ENSMUSG00000022323 | 0.033866 | 2.147242183 | Hrsp12        | ENSMUSG00000026748 | 0.00183155 | 2.150712555 | Plxdc2        |
| ENSMUSG00000036356 | 0.033506 | 2.147163241 | Csgalnact1    | ENSMUSG00000021756 | 0.04012413 | 2.149667926 | Il6st         |
| ENSMUSG00000026628 | 0.047339 | 2.146759369 | Atf3          | ENSMUSG00000031893 | 0.03663411 | 2.14929411  | Tsnaxip1      |
| ENSMUSG00000026495 | 0.041234 | 2.146365905 | Efcab2        | ENSMUSG00000026809 | 0.01819837 | 2.146825622 | Spaca9        |
| ENSMUSG00000038668 | 0.028533 | 2.145052702 | Lpar1         | ENSMUSG0000001827  | 0.02179036 | 2.146350136 | Folr1         |
| ENSMUSG00000039782 | 0.03243  | 2.126553367 | Cpeb2         | ENSMUSG00000036249 | 0.00443065 | 2.144617045 | Rbm43         |
| ENSMUSG00000024261 | 0.041234 | 2.118375646 | Syt4          | ENSMUSG00000064280 | 0.0087902  | 2.142993789 | Ccdc146       |
| ENSMUSG0000001763  | 0.026269 | 2.11077688  | Tspan33       | ENSMUSG00000021585 | 0.03150867 | 2.142973902 | Cast          |
| ENSMUSG00000020263 | 0.033102 | 2.109320941 | Appl2         | ENSMUSG00000029561 | 0.00135478 | 2.142530917 | Oasl2         |
| ENSMUSG00000038233 | 0.033494 | 2.104372072 | Fam198a       | ENSMUSG00000032352 | 0.00127873 | 2.142068024 | Lrrc1         |
| ENSMUSG00000022037 | 0.019552 | 2.094206764 | Clu           | ENSMUSG00000044350 | 0.00483747 | 2.141201131 | Lacc1         |
| ENSMUSG00000014602 | 0.028801 | 2.092652087 | Kif1a         | ENSMUSG00000071324 | 0.03220887 | 2.139185815 | Armc2         |
| ENSMUSG00000020604 | 0.038129 | 2.079624534 | Arsg          | ENSMUSG00000022602 | 0.00051868 | 2.13880793  | Arc           |
| ENSMUSG00000032849 | 0.041433 | 2.078445083 | Abcc4         | ENSMUSG00000023931 | 0.01906844 | 2.138346703 | Efhh          |
| ENSMUSG0000001025  | 0.038812 | 2.077635709 | S100a6        | ENSMUSG00000033488 | 0.00295841 | 2.138220784 | BC026585      |
| ENSMUSG00000019810 | 0.036342 | 2.069086843 | Fuca2         | ENSMUSG00000041548 | 0.00040649 | 2.13738572  | Hspb8         |
| ENSMUSG00000038077 | 0.025124 | 2.057581536 | Kcna6         | ENSMUSG00000049353 | 0.00283132 | 2.136209549 | Rd3           |
| ENSMUSG00000046844 | 0.041927 | 2.048589768 | Vat1l         | ENSMUSG00000030321 | 0.03234608 | 2.135513761 | Efcab12       |
| ENSMUSG00000027221 | 0.032239 | 2.047378299 | Chst1         | ENSMUSG00000052430 | 0.0387476  | 2.135491924 | Bmpr1b        |
| ENSMUSG00000037509 | 0.038054 | 2.041545486 | Arhgef4       | ENSMUSG00000066196 | 0.00313962 | 2.133888704 | Spag8         |
| ENSMUSG00000059713 | 0.02302  | 2.030125114 | Rcan3         | ENSMUSG00000026730 | 0.00095446 | 2.132840725 | Pter          |
| ENSMUSG00000021027 | 0.034926 | 2.02893096  | Ralgapa1      | ENSMUSG00000049811 | 0.00443065 | 2.130856272 | Fam161a       |
| ENSMUSG00000027215 | 0.043005 | 2.02736132  | Cd82          | ENSMUSG00000085407 | 0.04983945 | 2.13072583  | 1700095J03Rik |
| ENSMUSG00000035133 | 0.034068 | 2.021827297 | Arhgap5       | ENSMUSG00000015085 | 0.00075996 | 2.128671803 | Entpd2        |
| ENSMUSG00000021536 | 0.028207 | 2.019447719 | Adcy2         | ENSMUSG00000030847 | 0.00064512 | 2.127094772 | Bag3          |
| ENSMUSG00000061601 | 0.049883 | 2.018742306 | Pclo          | ENSMUSG00000060224 | 0.00091505 | 2.122823963 | Pyroxd2       |
| ENSMUSG00000032418 | 0.022556 | 2.017465957 | Me1           | ENSMUSG00000040936 | 0.01359928 | 2.119268939 | Ulk4          |
| ENSMUSG00000035686 | 0.041349 | 2.004110127 | Thrsp         | ENSMUSG00000086224 | 0.03685827 | 2.118901316 | 2700069J18Rik |
| ENSMUSG00000017754 | 0.029548 | 2.00323113  | Pltp          | ENSMUSG00000035896 | 0.02283965 | 2.116825527 | Rnase1        |
| ENSMUSG00000029413 | 0.034816 | 1.987027205 | Naa           | ENSMUSG00000050270 | 0.0176583  | 2.112718505 | Tmem220       |
| ENSMUSG00000025026 | 0.034466 | 1.985544134 | Add3          | ENSMUSG00000050953 | 0.00601868 | 2.109638194 | Gja1          |
| ENSMUSG00000028552 | 0.025997 | 1.984844215 | Eps15         | ENSMUSG00000020932 | 2.7782E-05 | 2.108504666 | Gfap          |
| ENSMUSG00000041556 | 0.022855 | 1.981672886 | Fbxo2         | ENSMUSG00000068762 | 0.00475123 | 2.108290757 | Gstm6         |
| ENSMUSG00000018909 | 0.040936 | 1.976682476 | Arrb1         | ENSMUSG00000028195 | 0.00018744 | 2.106648948 | Cyr61         |
| ENSMUSG00000020326 | 0.038685 | 1.974076326 | Ccng1         | ENSMUSG00000053702 | 0.03661102 | 2.106515392 | Nebl          |
| ENSMUSG00000031207 | 0.031708 | 1.963001219 | Msn           | ENSMUSG00000025888 | 0.00690883 | 2.105796836 | Casp1         |
| ENSMUSG00000029769 | 0.031382 | 1.959097949 | Ccdc136       | ENSMUSG00000030494 | 0.01190031 | 2.105600064 | Rhpn2         |
| ENSMUSG00000022620 | 0.032176 | 1.953920565 | Arsa          | ENSMUSG00000022783 | 0.00688988 | 2.104760787 | Spag6l        |
| ENSMUSG00000053819 | 0.027668 | 1.941578412 | Camk2d        | ENSMUSG00000039865 | 0.04765706 | 2.104509754 | Slc44a3       |
| ENSMUSG00000021814 | 0.04779  | 1.934152532 | Anxa7         | ENSMUSG00000048960 | 0.00735566 | 2.102587639 | Prex2         |
| ENSMUSG00000037685 | 0.048097 | 1.933609668 | Atp8a1        | ENSMUSG00000063428 | 0.00278346 | 2.100869765 | Ddo           |
| ENSMUSG00000072966 | 0.047339 | 1.930701258 | Gprasp2       | ENSMUSG00000025931 | 0.00744949 | 2.099999379 | Paqr8         |
| ENSMUSG00000029007 | 0.049678 | 1.925949695 | Agtrap        | ENSMUSG00000010136 | 0.00340684 | 2.099460541 | Pifo          |
| ENSMUSG00000037071 | 0.033362 | 1.914766032 | Scd1          | ENSMUSG00000037683 | 0.00296363 | 2.099431172 | Armc3         |
| ENSMUSG00000033577 | 0.032239 | 1.913604925 | Myo6          | ENSMUSG00000040848 | 0.02775417 | 2.098569447 | Sft2d2        |
| ENSMUSG00000060961 | 0.036097 | 1.908777165 | Slc4a4        | ENSMUSG00000022431 | 0.02026938 | 2.0985455   | Ribc2         |
| ENSMUSG00000021884 | 0.047339 | 1.906074997 | Hacl1         | ENSMUSG00000024197 | 0.00047616 | 2.097394935 | Plin3         |
| ENSMUSG00000021277 | 0.036097 | 1.905733378 | Traf3         | ENSMUSG0000007908  | 0.01979683 | 2.096822432 | Hmgcll1       |
| ENSMUSG00000039809 | 0.031522 | 1.882226582 | Gabbr2        | ENSMUSG00000039706 | 0.00211297 | 2.096155487 | Ldb2          |
| ENSMUSG00000024423 | 0.038685 | 1.880714801 | Impact        | ENSMUSG00000031558 | 0.02598904 | 2.095268269 | Slit2         |
| ENSMUSG00000031983 | 0.02563  | 1.877463804 | 2310022B05Rik | ENSMUSG00000072663 | 0.03870685 | 2.088692477 | Spef2         |

|                     |          |              |         |                     |            |             |               |
|---------------------|----------|--------------|---------|---------------------|------------|-------------|---------------|
| ENSMUSG00000029212  | 0.04779  | 1.856008592  | Gabrb1  | ENSMUSG00000047021  | 0.04047097 | 2.08826573  | Ccdc108       |
| ENSMUSG00000020841  | 0.04174  | 1.85539652   | Cpd     | ENSMUSG00000079057  | 0.04982066 | 2.087879425 | Cyp4v3        |
| ENSMUSG00000022505  | 0.038146 | 1.85225294   | Emp2    | ENSMUSG00000052221  | 0.01539491 | 2.080676702 | Ppp1r36       |
| ENSMUSG00000040929  | 0.037266 | 1.834892611  | Rfx3    | ENSMUSG00000025586  | 0.00803724 | 2.08031898  | Cpeb1         |
| ENSMUSG00000035847  | 0.036312 | 1.833964534  | Ids     | ENSMUSG00000031538  | 0.0009878  | 2.079916329 | Plat          |
| ENSMUSG00000030307  | 0.029505 | 1.830802391  | Slc6a11 | ENSMUSG00000097493  | 0.02517714 | 2.079691698 | 9930014A18Rik |
| ENSMUSG00000053141  | 0.049104 | 1.803086434  | Ptprt   | ENSMUSG00000059970  | 0.00040649 | 2.079479665 | Hspa2         |
| ENSMUSG00000025203  | 0.040214 | 1.778149561  | Scd2    | ENSMUSG00000020799  | 0.00857331 | 2.079408596 | Tekt1         |
| ENSMUSG00000020315  | 0.036908 | 1.774787622  | Sptbn1  | ENSMUSG00000059327  | 0.02732231 | 2.076059328 | Eda           |
| ENSMUSG00000037902  | 0.042148 | 1.743305713  | Sirpa   | ENSMUSG00000022562  | 0.00101359 | 2.073474112 | Oplah         |
| ENSMUSG00000039952  | 0.046109 | 1.722794071  | Dag1    | ENSMUSG00000078853  | 0.00107355 | 2.072982884 | Igtp          |
| ENSMUSG00000006800  | 0.046334 | 1.698899584  | Sulf2   | ENSMUSG00000031927  | 0.02783218 | 2.071285585 | 1700012B09Rik |
| ENSMUSG00000059208  | 0.047005 | -1.652058651 | Hnrnpm  | ENSMUSG00000043913  | 0.0059303  | 2.070457797 | Ccdc60        |
| ENSMUSG00000074088  | 0.049104 | -1.684001476 | Snrnp40 | ENSMUSG00000079037  | 0.00018341 | 2.069834767 | Prnp          |
| ENSMUSG00000031311  | 0.043972 | -1.686432115 | Nono    | ENSMUSG00000030089  | 0.00342714 | 2.068955052 | Slc41a3       |
| ENSMUSG00000041126  | 0.047839 | -1.707041997 | H2afv   | ENSMUSG00000022297  | 0.01420346 | 2.067794943 | Fzd6          |
| ENSMUSG00000015937  | 0.045748 | -1.70724491  | H2afy   | ENSMUSG00000044122  | 0.01097502 | 2.066233348 | Proca1        |
| ENSMUSG00000048001  | 0.038054 | -1.70748694  | Hes5    | ENSMUSG00000050737  | 0.00188956 | 2.066199098 | Ptges         |
| ENSMUSG00000040209  | 0.048981 | -1.711854968 | Zfp704  | ENSMUSG00000028167  | 0.00231438 | 2.065823414 | Bdh2          |
| ENSMUSG00000027405  | 0.038685 | -1.712480515 | Nop56   | ENSMUSG00000045659  | 0.0146903  | 2.065036175 | Plekha7       |
| ENSMUSG00000004642  | 0.048266 | -1.724142491 | Silpb   | ENSMUSG00000037509  | 0.00891712 | 2.063461217 | Arhgef4       |
| ENSMUSG00000027649  | 0.042499 | -1.725950742 | Ctnnbl1 | ENSMUSG00000045827  | 0.01999568 | 2.063456549 | Serpinb9      |
| ENSMUSG00000038000  | 0.044277 | -1.729263656 | Acad    | ENSMUSG00000056666  | 0.00270014 | 2.061210035 | Retsat        |
| ENSMUSG00000020167  | 0.040834 | -1.732112297 | Tcf3    | ENSMUSG00000032577  | 0.00192927 | 2.059146915 | Mapkapk3      |
| ENSMUSG00000028633  | 0.043007 | -1.73448656  | Ctpts   | ENSMUSG00000043541  | 0.01096649 | 2.056438746 | Casc1         |
| ENSMUSG00000030189  | 0.047583 | -1.735983858 | Ybx3    | ENSMUSG00000041556  | 0.00341138 | 2.055042277 | Fbxo2         |
| ENSMUSG00000060572  | 0.038129 | -1.738642495 | Mfap2   | ENSMUSG00000037321  | 0.001874   | 2.053698031 | Tap1          |
| ENSMUSG00000030978  | 0.038054 | -1.741313255 | Rrm1    | ENSMUSG00000003974  | 0.00665252 | 2.051568518 | Grm3          |
| ENSMUSG0000003438   | 0.040578 | -1.750721231 | Timm50  | ENSMUSG00000050677  | 0.01268313 | 2.051522467 | Ccdc96        |
| ENSMUSG00000005481  | 0.036097 | -1.759069987 | Ddx39   | ENSMUSG00000071550  | 0.00742825 | 2.051228197 | Cfap44        |
| ENSMUSG00000015776  | 0.042431 | -1.765960221 | Med22   | ENSMUSG00000003354  | 0.01157827 | 2.048538271 | Ccdc65        |
| ENSMUSG00000022433  | 0.039972 | -1.768186777 | Csnk1e  | ENSMUSG00000028370  | 0.01996391 | 2.047525358 | Pappa         |
| ENSMUSG00000003269  | 0.041433 | -1.768876331 | Cyth2   | ENSMUSG00000019359  | 0.00068656 | 2.047476623 | Gdpd2         |
| ENSMUSG00000042834  | 0.032176 | -1.778858444 | Nrep    | ENSMUSG00000033544  | 0.02732231 | 2.046394017 | Angptl1       |
| ENSMUSG00000061689  | 0.039434 | -1.7789044   | Dlgap4  | ENSMUSG00000046818  | 0.00077314 | 2.045836183 | Ddit4l        |
| ENSMUSG00000096210  | 0.034068 | -1.794253039 | H1fo    | ENSMUSG00000032220  | 0.03069262 | 2.045010687 | Myo1e         |
| ENSMUSG00000027404  | 0.036097 | -1.797437582 | Snrpb   | ENSMUSG00000001763  | 0.04464089 | 2.04410827  | Tspan33       |
| ENSMUSG000000028796 | 0.031382 | -1.80231426  | Phc2    | ENSMUSG00000035403  | 0.02463615 | 2.0439485   | Crsb          |
| ENSMUSG00000046178  | 0.033494 | -1.806459512 | Nxph1   | ENSMUSG00000061322  | 0.00414279 | 2.043874569 | Dnaic1        |
| ENSMUSG00000038544  | 0.038054 | -1.806810642 | Inip    | ENSMUSG00000018500  | 0.0048272  | 2.042229784 | Adora2b       |
| ENSMUSG00000020739  | 0.032762 | -1.809087653 | Nup85   | ENSMUSG00000039110  | 0.02086528 | 2.041583704 | Mycbpap       |
| ENSMUSG00000004880  | 0.040481 | -1.810884338 | Lbr     | ENSMUSG00000026471  | 0.01442996 | 2.039979702 | Mr1           |
| ENSMUSG000000052429 | 0.035694 | -1.812057844 | Prmt1   | ENSMUSG000000086003 | 0.02687003 | 2.039819715 | B230206L02Rik |
| ENSMUSG000000052798 | 0.040834 | -1.816480586 | Nup107  | ENSMUSG000000048450 | 0.00793891 | 2.038326535 | Msx1          |
| ENSMUSG00000035934  | 0.03433  | -1.818065291 | Pknx2   | ENSMUSG00000024339  | 0.00142489 | 2.036831527 | Tap2          |
| ENSMUSG00000034220  | 0.034068 | -1.824408112 | Gpc1    | ENSMUSG00000039552  | 0.04088273 | 2.035798105 | Rsph4a        |
| ENSMUSG00000040945  | 0.035698 | -1.824489428 | Rcc2    | ENSMUSG00000001473  | 0.00190514 | 2.035002773 | Tubb6         |
| ENSMUSG00000001525  | 0.049104 | -1.831528683 | Tubb5   | ENSMUSG00000075302  | 0.01146311 | 2.033515598 | Erich2        |
| ENSMUSG00000001300  | 0.047361 | -1.83281674  | Efnb2   | ENSMUSG00000027111  | 0.00242016 | 2.032654887 | Itga6         |
| ENSMUSG00000019961  | 0.026926 | -1.837772703 | Tmpo    | ENSMUSG00000046312  | 0.0039081  | 2.031235244 | Al464131      |
| ENSMUSG00000025134  | 0.029046 | -1.845774001 | Alyref  | ENSMUSG00000015839  | 0.00056355 | 2.031202604 | Nfe2l2        |
| ENSMUSG00000008958  | 0.033155 | -1.847659191 | Vps72   | ENSMUSG00000020333  | 0.00137753 | 2.03103451  | Acsl6         |
| ENSMUSG00000052957  | 0.039814 | -1.849705012 | Gas1    | ENSMUSG00000044835  | 0.03060077 | 2.029862655 | Ankrd45       |
| ENSMUSG00000004530  | 0.026289 | -1.851788393 | Coro1c  | ENSMUSG00000025026  | 0.00323251 | 2.029408591 | Add3          |
| ENSMUSG00000014773  | 0.032391 | -1.862642819 | Dil1    | ENSMUSG00000026765  | 0.01331504 | 2.029149479 | Lypd6b        |
| ENSMUSG00000028312  | 0.043491 | -1.863240709 | Smc2    | ENSMUSG00000004044  | 0.00215804 | 2.029076455 | Ptrf          |
| ENSMUSG00000026355  | 0.026269 | -1.870994671 | Mcm6    | ENSMUSG00000020641  | 0.00484675 | 2.028931665 | Rsad2         |
| ENSMUSG00000039830  | 0.034362 | -1.875290141 | Olig2   | ENSMUSG00000038776  | 0.00094284 | 2.028772013 | Ephx1         |
| ENSMUSG00000020471  | 0.034858 | -1.876135692 | Pold2   | ENSMUSG00000023913  | 0.00031293 | 2.027583033 | Pla2g7        |
| ENSMUSG00000006728  | 0.033362 | -1.89319307  | Cdk4    | ENSMUSG00000022323  | 0.00091505 | 2.02707181  | Rida          |
| ENSMUSG00000027203  | 0.046334 | -1.894987395 | Dut     | ENSMUSG00000035385  | 0.024525   | 2.025926146 | Ccl2          |
| ENSMUSG00000031134  | 0.024126 | -1.900591019 | Rbmx    | ENSMUSG00000030111  | 0.03074773 | 2.025909583 | A2m           |
| ENSMUSG00000021115  | 0.036321 | -1.904941025 | Vrk1    | ENSMUSG00000096727  | 0.01603883 | 2.024346295 | Psmb9         |
| ENSMUSG00000024844  | 0.04779  | -1.906505417 | Banf1   | ENSMUSG000000040473 | 0.00816641 | 2.023936645 | Cfap69        |
| ENSMUSG00000020547  | 0.031382 | -1.906813718 | Bzw2    | ENSMUSG000000040189 | 0.01407668 | 2.023604402 | Ccdc114       |
| ENSMUSG00000043858  | 0.036015 | -1.913060065 | Nup62   | ENSMUSG00000019577  | 0.0092541  | 2.022378072 | Pdk4          |
| ENSMUSG00000024312  | 0.045851 | -1.915403263 | Wdr46   | ENSMUSG00000068699  | 0.0365532  | 2.021922043 | Flncl         |
| ENSMUSG00000038943  | 0.045233 | -1.915552674 | Prc1    | ENSMUSG00000092536  | 0.01268313 | 2.02154791  | Gm20501       |
| ENSMUSG00000025395  | 0.048066 | -1.915731429 | Prim1   | ENSMUSG00000046879  | 0.00102768 | 2.021363613 | Irgm1         |
| ENSMUSG00000008999  | 0.040834 | -1.91923299  | Bmp7    | ENSMUSG00000024411  | 0.00573187 | 2.021012872 | Aqp4          |
| ENSMUSG00000050822  | 0.045515 | -1.924076803 | Slc29a4 | ENSMUSG00000039239  | 0.001119   | 2.020302031 | Tgfb2         |
| ENSMUSG00000020358  | 0.026267 | -1.937052539 | Hnrnpab | ENSMUSG00000029413  | 0.00060213 | 2.018898972 | Naaa          |
| ENSMUSG00000030393  | 0.049462 | -1.937183284 | Zik1    | ENSMUSG00000024033  | 0.00194369 | 2.01882057  | Rsph1         |
| ENSMUSG00000037474  | 0.049677 | -1.941930783 | Dtl     | ENSMUSG00000019027  | 0.02504188 | 2.017362011 | Dnah1         |
| ENSMUSG00000034675  | 0.034466 | -1.952257375 | Dbn1    | ENSMUSG00000020828  | 0.00117518 | 2.017263591 | Pld2          |

|                     |          |              |               |                     |             |             |               |
|---------------------|----------|--------------|---------------|---------------------|-------------|-------------|---------------|
| ENSMUSG00000002055  | 0.034858 | -1.970938533 | Spag5         | ENSMUSG000000021281 | 0.0164722   | 2.016267171 | Tnfaip2       |
| ENSMUSG000000039244 | 0.035698 | -1.97925982  | E130309D02Rik | ENSMUSG000000090002 | 0.04765706  | 2.015153132 | Gm16006       |
| ENSMUSG000000059791 | 0.045707 | -1.980221013 | Nrm           | ENSMUSG000000063558 | 0.00982481  | 2.014978228 | Aox1          |
| ENSMUSG000000031848 | 0.038685 | -1.984427038 | Lsm4          | ENSMUSG000000025963 | 0.01938401  | 2.01477175  | Mdh1b         |
| ENSMUSG000000024590 | 0.031684 | -1.987217778 | Lmnb1         | ENSMUSG000000049488 | 0.02007301  | 2.014709176 | Tmem67        |
| ENSMUSG000000063445 | 0.049733 | -1.989592212 | Nmral1        | ENSMUSG000000027408 | 0.00040649  | 2.013472894 | Cpxm1         |
| ENSMUSG000000056394 | 0.027946 | -1.994331355 | Lig1          | ENSMUSG000000010044 | 0.01505914  | 2.013111943 | Zmynd10       |
| ENSMUSG000000006632 | 0.018999 | -2.006844896 | Sez6          | ENSMUSG000000054619 | 0.01188729  | 2.012287051 | Mettl7a1      |
| ENSMUSG000000037894 | 0.032239 | -2.012238645 | H2afz         | ENSMUSG000000025887 | 0.02645258  | 2.012116194 | Casp12        |
| ENSMUSG000000020427 | 0.023227 | -2.018374325 | Igfbp3        | ENSMUSG000000061878 | 0.01767902  | 2.012032025 | Sphk1         |
| ENSMUSG000000024968 | 0.038994 | -2.021790679 | Rcor2         | ENSMUSG000000021340 | 0.01580188  | 2.01197024  | Gpld1         |
| ENSMUSG000000038718 | 0.034068 | -2.024607468 | Pbx3          | ENSMUSG000000055026 | 0.00474072  | 2.01187242  | Gabrg3        |
| ENSMUSG000000029687 | 0.022556 | -2.028575928 | Ezh2          | ENSMUSG000000031273 | 0.02211385  | 2.010480224 | Col4a6        |
| ENSMUSG000000047534 | 0.038416 | -2.029538547 | Mis18bp1      | ENSMUSG000000024292 | 0.01249461  | 2.009612332 | Cyp4f14       |
| ENSMUSG000000016179 | 0.029505 | -2.047080577 | Camk1g        | ENSMUSG000000053111 | 0.00600737  | 2.009196827 | Fank1         |
| ENSMUSG000000024660 | 0.03685  | -2.057191949 | Incenp        | ENSMUSG000000021743 | 0.00277458  | 2.007535786 | Fezf2         |
| ENSMUSG000000034317 | 0.032755 | -2.060687738 | Trim59        | ENSMUSG000000035126 | 0.03817034  | 2.00750545  | Wdr78         |
| ENSMUSG000000040972 | 0.028171 | -2.063082343 | Igfsf21       | ENSMUSG000000034258 | 0.03386885  | 2.007137691 | Mfsd7c        |
| ENSMUSG000000046160 | 0.02563  | -2.06364776  | Olig1         | ENSMUSG000000049313 | 0.00323513  | 2.004166144 | Sorl1         |
| ENSMUSG000000020086 | 0.021994 | -2.072460394 | H2afy2        | ENSMUSG000000021259 | 0.00114152  | 2.001141508 | Cyp46a1       |
| ENSMUSG000000064264 | 0.032239 | -2.075296505 | Zfp428        | ENSMUSG000000009614 | 0.00186278  | 2.001013113 | Sardh         |
| ENSMUSG000000047139 | 0.026926 | -2.078199631 | Cd24a         | ENSMUSG000000015243 | 0.00429664  | 1.99891913  | Abca1         |
| ENSMUSG000000004151 | 0.015854 | -2.090780762 | Etv1          | ENSMUSG000000060477 | 0.02511774  | 1.998785239 | Irak2         |
| ENSMUSG000000015217 | 0.018999 | -2.093254574 | Hmgb3         | ENSMUSG000000048148 | 0.00466864  | 1.995377156 | Nwd1          |
| ENSMUSG000000041708 | 0.035698 | -2.093983048 | Mpped1        | ENSMUSG000000073856 | 0.00385188  | 1.994594991 | Iqck          |
| ENSMUSG000000039994 | 0.040834 | -2.094566275 | Timeless      | ENSMUSG000000026142 | 0.01620228  | 1.993060749 | Rhbdd1        |
| ENSMUSG000000032599 | 0.019552 | -2.1311294   | Ip6k2         | ENSMUSG000000073555 | 0.00947803  | 1.992462306 | Gm4951        |
| ENSMUSG000000027379 | 0.049678 | -2.132974031 | Bub1          | ENSMUSG000000056598 | 0.0020462   | 1.98902038  | Lrrc48        |
| ENSMUSG00000000861  | 0.027867 | -2.134063875 | Bcl11a        | ENSMUSG000000035237 | 0.002845    | 1.987899991 | Lcat          |
| ENSMUSG000000003657 | 0.022556 | -2.136739061 | Calb2         | ENSMUSG000000026831 | 0.01228868  | 1.987539429 | 1700007K13Rik |
| ENSMUSG000000027210 | 0.012683 | -2.137842367 | Meis2         | ENSMUSG000000020334 | 0.002276459 | 1.986750079 | Slc22a4       |
| ENSMUSG000000034936 | 0.047005 | -2.140216259 | Arl4d         | ENSMUSG000000031613 | 0.00387442  | 1.982228655 | Hpgd          |
| ENSMUSG000000038644 | 0.018824 | -2.140745084 | Pold1         | ENSMUSG000000038855 | 0.00323251  | 1.982202583 | Itpkb         |
| ENSMUSG000000040274 | 0.044133 | -2.141250944 | Cdk6          | ENSMUSG000000033717 | 0.02602112  | 1.98209329  | Adra2a        |
| ENSMUSG000000097195 | 0.036097 | -2.146383577 | Snhg5         | ENSMUSG000000024778 | 0.00483747  | 1.981212562 | Fas           |
| ENSMUSG000000017386 | 0.019552 | -2.149880384 | Traf4         | ENSMUSG000000028294 | 0.01336951  | 1.980611021 | Cfap206       |
| ENSMUSG000000029730 | 0.011921 | -2.155821525 | Mcm7          | ENSMUSG000000037196 | 0.00263037  | 1.980047883 | Pacrg         |
| ENSMUSG000000041859 | 0.02257  | -2.156872663 | Mcm3          | ENSMUSG000000051029 | 0.02414092  | 1.979417035 | Serpinb1b     |
| ENSMUSG000000022773 | 0.015344 | -2.157484079 | Ypel1         | ENSMUSG000000100594 | 0.04285886  | 1.978474108 | 2810414N06Rik |
| ENSMUSG000000020914 | 0.014089 | -2.162533939 | Top2a         | ENSMUSG000000029182 | 0.04452246  | 1.977620011 | 1700001CO2Rik |
| ENSMUSG000000076437 | 0.022556 | -2.163676927 | 2700094K13Rik | ENSMUSG000000060675 | 0.00295911  | 1.976879187 | Pla2g16       |
| ENSMUSG000000038252 | 0.01369  | -2.180044121 | Ncapd2        | ENSMUSG00000005087  | 0.00675984  | 1.975024487 | Cd44          |
| ENSMUSG000000031971 | 0.040834 | -2.191162889 | Ccsap         | ENSMUSG000000035692 | 0.01181935  | 1.97467643  | Isg15         |
| ENSMUSG000000087006 | 0.033698 | -2.192779814 | Gm13889       | ENSMUSG000000021710 | 0.0032211   | 1.974068214 | Nln           |
| ENSMUSG000000047832 | 0.025164 | -2.198284202 | Cdca4         | ENSMUSG000000105504 | 0.04141878  | 1.973615753 | Gbp5          |
| ENSMUSG000000016262 | 0.022855 | -2.20140017  | Sertad4       | ENSMUSG000000035984 | 0.00688988  | 1.973216728 | Nme5          |
| ENSMUSG000000027469 | 0.014203 | -2.205330849 | Tpx2          | ENSMUSG000000029994 | 0.00178269  | 1.972468352 | Anxa4         |
| ENSMUSG000000020330 | 0.03041  | -2.20636068  | Hmmr          | ENSMUSG000000061232 | 0.00080814  | 1.971741568 | H2-K1         |
| ENSMUSG000000042462 | 0.037731 | -2.206846813 | Dctpp1        | ENSMUSG000000045092 | 0.00355323  | 1.970674394 | S1pr1         |
| ENSMUSG000000053129 | 0.038994 | -2.209865535 | Gsx1          | ENSMUSG000000031647 | 0.0378318   | 1.966081561 | Mfap3l        |
| ENSMUSG00000001517  | 0.034423 | -2.21167859  | Foxm1         | ENSMUSG000000025425 | 0.00353043  | 1.964918578 | St8sia5       |
| ENSMUSG000000028076 | 0.01369  | -2.215072139 | Cd1d1         | ENSMUSG000000030030 | 0.02740918  | 1.964792067 | 1700003E16Rik |
| ENSMUSG000000018362 | 0.033494 | -2.222431694 | Kpna2         | ENSMUSG000000043687 | 0.02182565  | 1.964508056 | 1190005I06Rik |
| ENSMUSG000000024245 | 0.033048 | -2.23080065  | Tmem178       | ENSMUSG000000032060 | 0.01106013  | 1.964021636 | Cryab         |
| ENSMUSG00000000184  | 0.022135 | -2.258659956 | Ccnd2         | ENSMUSG000000026701 | 0.00051028  | 1.963699007 | Prdx6         |
| ENSMUSG000000020737 | 0.011197 | -2.261088014 | Hn1           | ENSMUSG000000034467 | 0.00668396  | 1.962633906 | Dynlrb2       |
| ENSMUSG000000037313 | 0.011407 | -2.266774931 | Tacc3         | ENSMUSG000000026649 | 0.00753273  | 1.959241941 | Cfap126       |
| ENSMUSG000000052373 | 0.028027 | -2.268459074 | Mpp3          | ENSMUSG000000029007 | 0.00103312  | 1.958358982 | Agtrap        |
| ENSMUSG000000023015 | 0.011197 | -2.270185732 | Racgap1       | ENSMUSG000000069833 | 0.0020462   | 1.958327512 | Ahnak         |
| ENSMUSG000000048327 | 0.014089 | -2.271755022 | Ckap2l        | ENSMUSG000000049630 | 0.03155066  | 1.957365107 | C1ql3         |
| ENSMUSG000000067071 | 0.008446 | -2.280208474 | Hes6          | ENSMUSG000000073802 | 0.00508776  | 1.956421787 | Cdkn2b        |
| ENSMUSG00000003038  | 0.013018 | -2.290171682 | Hmgn2         | ENSMUSG000000097326 | 0.03870685  | 1.955925701 | A330048O09Rik |
| ENSMUSG000000022332 | 0.038699 | -2.290603541 | Khdrbs3       | ENSMUSG000000027004 | 0.02068171  | 1.954742431 | Frzb          |
| ENSMUSG000000026605 | 0.018581 | -2.293006853 | Cenpf         | ENSMUSG000000047557 | 0.00173553  | 1.953387746 | Lxn           |
| ENSMUSG000000037572 | 0.034068 | -2.293365248 | Wdh1          | ENSMUSG000000035104 | 0.00284035  | 1.951042985 | Eva1a         |
| ENSMUSG000000063632 | 0.011921 | -2.295237444 | Sox11         | ENSMUSG000000014599 | 0.002961    | 1.950193094 | Csf1          |
| ENSMUSG000000033970 | 0.01995  | -2.295899473 | Rfc3          | ENSMUSG000000031209 | 0.04231789  | 1.94972001  | Heph          |
| ENSMUSG000000006586 | 0.017229 | -2.300167167 | Runx1t1       | ENSMUSG000000039007 | 0.00105399  | 1.948090603 | Cpq           |
| ENSMUSG000000040084 | 0.018944 | -2.301919931 | Bub1b         | ENSMUSG000000033029 | 0.01967922  | 1.946984628 | 1700088E04Rik |
| ENSMUSG000000028044 | 0.025214 | -2.301986816 | Cks1b         | ENSMUSG000000029309 | 0.00081076  | 1.945932172 | Sparcl1       |
| ENSMUSG000000029910 | 0.018824 | -2.306503712 | Mad2l1        | ENSMUSG000000020878 | 0.00983395  | 1.944521993 | Lrrc46        |
| ENSMUSG000000003779 | 0.021806 | -2.307499078 | Kif20a        | ENSMUSG000000020774 | 0.03202547  | 1.942066177 | Aspa          |
| ENSMUSG000000012443 | 0.014203 | -2.309528405 | Kif11         | ENSMUSG000000032348 | 0.00196459  | 1.939833635 | Gsta4         |
| ENSMUSG000000027849 | 0.038129 | -2.311754384 | Syt6          | ENSMUSG000000033966 | 0.04997179  | 1.939022309 | Cdkl4         |
| ENSMUSG000000027715 | 0.011197 | -2.312119067 | Ccna2         | ENSMUSG000000024308 | 0.0006278   | 1.938759824 | Tapbp         |

|                     |          |              |               |                     |            |             |               |
|---------------------|----------|--------------|---------------|---------------------|------------|-------------|---------------|
| ENSMUSG0000068154   | 0.033698 | -2.312210365 | Insm1         | ENSMUSG00000040978  | 0.00502352 | 1.938198935 | Gm11992       |
| ENSMUSG00000033031  | 0.028732 | -2.314467492 | C330027C09Rik | ENSMUSG00000087264  | 0.03023103 | 1.936840393 | Gad1os        |
| ENSMUSG00000002835  | 0.037129 | -2.316713379 | Chaf1a        | ENSMUSG00000035578  | 0.00466864 | 1.935579653 | lqcg          |
| ENSMUSG00000048922  | 0.026943 | -2.31914084  | Cdca2         | ENSMUSG00000021583  | 0.04466755 | 1.935255945 | Erap1         |
| ENSMUSG00000090063  | 0.009835 | -2.330403428 | Dlx6os1       | ENSMUSG00000023249  | 0.00710375 | 1.933363129 | Parp3         |
| ENSMUSG00000070576  | 0.026269 | -2.333490927 | Mn1           | ENSMUSG00000068566  | 0.00623622 | 1.930287261 | Myadm         |
| ENSMUSG000000027654 | 0.028171 | -2.364898511 | Fam83d        | ENSMUSG000000057596 | 0.02625888 | 1.929791126 | Trim30d       |
| ENSMUSG00000056296  | 0.011197 | -2.336024195 | Synpr         | ENSMUSG00000051855  | 0.00080199 | 1.929780242 | Mest          |
| ENSMUSG00000047604  | 0.038812 | -2.337578244 | Frat2         | ENSMUSG00000038022  | 0.00249109 | 1.928727933 | Fam188b       |
| ENSMUSG00000029363  | 0.021424 | -2.339984852 | Rfc5          | ENSMUSG00000032066  | 0.03343263 | 1.92571842  | Bco2          |
| ENSMUSG00000028832  | 0.011214 | -2.350682997 | Stmn1         | ENSMUSG00000032377  | 0.00490091 | 1.925208985 | Plscr4        |
| ENSMUSG00000001228  | 0.011441 | -2.324898511 | Uhrf1         | ENSMUSG00000026600  | 0.00339164 | 1.922321896 | Soat1         |
| ENSMUSG00000022034  | 0.044327 | -2.372917984 | Esco2         | ENSMUSG00000042707  | 0.00530593 | 1.921673256 | Dnali1        |
| ENSMUSG00000031004  | 0.01878  | -2.3825291   | Mki67         | ENSMUSG00000030905  | 0.00086449 | 1.920310806 | Crym          |
| ENSMUSG00000026622  | 0.048814 | -2.390283555 | Nek2          | ENSMUSG00000015224  | 0.00262934 | 1.919708449 | Cyp2j9        |
| ENSMUSG00000016386  | 0.014089 | -2.392948258 | Mpped2        | ENSMUSG00000020963  | 0.03313767 | 1.918976563 | Tshr          |
| ENSMUSG00000049932  | 0.011197 | -2.401914442 | H2afx         | ENSMUSG000000022759 | 0.00886318 | 1.9189756   | Lrrc74b       |
| ENSMUSG00000072082  | 0.027668 | -2.402939908 | Ccnf          | ENSMUSG00000020562  | 0.03155066 | 1.917770352 | Efcab10       |
| ENSMUSG00000021714  | 0.038404 | -2.403359565 | Cenpk         | ENSMUSG00000032802  | 0.00060814 | 1.916466644 | Srxn1         |
| ENSMUSG00000050410  | 0.028732 | -2.407896307 | Tcf19         | ENSMUSG00000054667  | 0.02804819 | 1.915219753 | Irs4          |
| ENSMUSG00000025747  | 0.011921 | -2.411757493 | Tyms          | ENSMUSG00000025089  | 0.01712795 | 1.914037758 | Gfra1         |
| ENSMUSG00000036306  | 0.047822 | -2.414855236 | Lzts1         | ENSMUSG00000027007  | 0.00852741 | 1.913705751 | Ssfa2         |
| ENSMUSG000000032363 | 0.030354 | -2.425877999 | Adamts7       | ENSMUSG000000032359 | 0.00638899 | 1.911660709 | Ctsh          |
| ENSMUSG00000056612  | 0.013018 | -2.431221747 | Ppp1r14b      | ENSMUSG00000103897  | 0.0479567  | 1.911300071 | Pcdhga8       |
| ENSMUSG00000023940  | 0.049104 | -2.440167449 | Sgol1         | ENSMUSG00000037815  | 0.00450928 | 1.909431895 | Ctnna1        |
| ENSMUSG00000039323  | 0.007454 | -2.457407599 | Igfbp2        | ENSMUSG00000022040  | 0.00207093 | 1.908284695 | Ephx2         |
| ENSMUSG00000033767  | 0.007292 | -2.45781717  | D930015E06Rik | ENSMUSG00000029206  | 0.01202638 | 1.907085439 | Nsun7         |
| ENSMUSG00000006585  | 0.030933 | -2.461605834 | Cdt1          | ENSMUSG000000031616 | 0.03604595 | 1.906035849 | Ednra         |
| ENSMUSG00000068735  | 0.009835 | -2.469734398 | Trp53i11      | ENSMUSG00000019872  | 0.00095895 | 1.90557504  | Smpd13a       |
| ENSMUSG00000022881  | 0.02563  | -2.473374712 | Rfc4          | ENSMUSG00000045287  | 0.01179285 | 1.904707831 | Rtn4r1        |
| ENSMUSG00000054717  | 0.013018 | -2.475332717 | Hmgb2         | ENSMUSG00000047394  | 0.03074773 | 1.904054695 | Odf3b         |
| ENSMUSG00000030346  | 0.027668 | -2.476837758 | Rad51ap1      | ENSMUSG00000031073  | 0.04362411 | 1.90190318  | Fgf15         |
| ENSMUSG000000005233 | 0.011197 | -2.484728628 | Spc25         | ENSMUSG000000060336 | 0.01090121 | 1.90121771  | Zfp937        |
| ENSMUSG00000026683  | 0.017122 | -2.489865486 | Nuf2          | ENSMUSG00000037999  | 0.00595601 | 1.90101926  | Arap2         |
| ENSMUSG00000031530  | 0.024947 | -2.494242703 | Dusp4         | ENSMUSG00000031274  | 0.04915041 | 1.899311878 | Col4a5        |
| ENSMUSG00000035277  | 0.011921 | -2.499050573 | Arx           | ENSMUSG00000029380  | 0.00791339 | 1.898993963 | Cxcl1         |
| ENSMUSG00000028678  | 0.021806 | -2.508023939 | Kif2c         | ENSMUSG00000025420  | 0.00350759 | 1.896984696 | Katnal2       |
| ENSMUSG00000048562  | 0.032239 | -2.512750116 | Sp8           | ENSMUSG00000042228  | 0.00386411 | 1.895890903 | Lyn           |
| ENSMUSG00000020897  | 0.014089 | -2.517478999 | Aurkb         | ENSMUSG00000036718  | 0.01390965 | 1.895039228 | Micall2       |
| ENSMUSG00000024989  | 0.039972 | -2.528545557 | Cep55         | ENSMUSG00000074215  | 0.04350988 | 1.893982748 | Gm10643       |
| ENSMUSG00000038457  | 0.041234 | -2.537362922 | Tmem255b      | ENSMUSG00000024526  | 0.01595026 | 1.893807559 | Cidea         |
| ENSMUSG00000037466  | 0.028923 | -2.538994822 | 4930427A07Rik | ENSMUSG00000053279  | 0.04230269 | 1.893030989 | Aldh1a1       |
| ENSMUSG000000032491 | 0.043005 | -2.547423339 | Nrad2         | ENSMUSG00000016534  | 0.0068058  | 1.892996929 | Lamp2         |
| ENSMUSG00000045328  | 0.014836 | -2.548639444 | Cenpe         | ENSMUSG00000062480  | 0.03562839 | 1.892589097 | Acat3         |
| ENSMUSG00000002870  | 0.006721 | -2.570286482 | Mcm2          | ENSMUSG00000028139  | 0.0086231  | 1.89252396  | Riiad1        |
| ENSMUSG00000021569  | 0.040834 | -2.570658602 | Trip13        | ENSMUSG00000021814  | 0.00122666 | 1.891838592 | Anxa7         |
| ENSMUSG00000089832  | 0.01995  | -2.584019401 | Shkbp1        | ENSMUSG00000048218  | 0.03060978 | 1.890775281 | Amigo2        |
| ENSMUSG00000085007  | 0.038416 | -2.59476488  | Gm11549       | ENSMUSG00000030088  | 0.00107355 | 1.890650223 | Aldh1l1       |
| ENSMUSG00000041431  | 0.006721 | -2.627457994 | Ccnb1         | ENSMUSG000000035179 | 0.01302475 | 1.888175186 | Ppp1r32       |
| ENSMUSG00000076431  | 0.011197 | -2.629362046 | Sox4          | ENSMUSG00000041617  | 0.01607541 | 1.888039214 | Ccdc74a       |
| ENSMUSG00000019214  | 0.035698 | -2.654379316 | Chtf18        | ENSMUSG00000031636  | 0.01582157 | 1.886921238 | Pdlim3        |
| ENSMUSG00000041911  | 0.007278 | -2.659981203 | Dlx1          | ENSMUSG00000064373  | 0.00066236 | 1.886908335 | Sepp1         |
| ENSMUSG00000026955  | 0.011921 | -2.661635007 | Sapcd2        | ENSMUSG00000058586  | 0.00645484 | 1.886265651 | Serhl         |
| ENSMUSG00000015880  | 0.035698 | -2.670906005 | Ncapg         | ENSMUSG00000027712  | 0.00066549 | 1.886024321 | Anxa5         |
| ENSMUSG00000022322  | 0.01369  | -2.673458924 | Shcbp1        | ENSMUSG00000024900  | 0.01699896 | 1.885935849 | Cpt1a         |
| ENSMUSG00000027115  | 0.035055 | -2.675934871 | Kif18a        | ENSMUSG00000042082  | 0.03155915 | 1.884937837 | Arsb          |
| ENSMUSG00000028066  | 0.018756 | -2.68476015  | Pmf1          | ENSMUSG00000022483  | 0.01506876 | 1.882662416 | Col2a1        |
| ENSMUSG00000031756  | 0.030749 | -2.68596737  | Cenpn         | ENSMUSG00000028838  | 0.02000051 | 1.881769937 | Extl1         |
| ENSMUSG00000024791  | 0.032463 | -2.68633209  | Cdca5         | ENSMUSG000000035275 | 0.01934179 | 1.881088758 | Raver2        |
| ENSMUSG00000068101  | 0.024126 | -2.689987451 | Cenpm         | ENSMUSG00000042116  | 0.00883778 | 1.880627334 | Vwa1          |
| ENSMUSG00000028551  | 0.014203 | -2.692217216 | Cdkn2c        | ENSMUSG00000032372  | 0.04073853 | 1.880315182 | Plscr2        |
| ENSMUSG00000034906  | 0.011197 | -2.717666224 | Ncaph         | ENSMUSG00000109284  | 0.00844375 | 1.879154371 | B230311B06Rik |
| ENSMUSG00000005410  | 0.009811 | -2.718614633 | Mcm5          | ENSMUSG00000039533  | 0.00018341 | 1.877834509 | Mmd2          |
| ENSMUSG000000062248 | 0.045707 | -2.725691561 | Cks2          | ENSMUSG00000026679  | 0.01176963 | 1.877290978 | Enkur         |
| ENSMUSG00000029177  | 0.007454 | -2.732136664 | Cenpa         | ENSMUSG00000047230  | 0.04420675 | 1.875944709 | Cldn2         |
| ENSMUSG00000023505  | 0.007278 | -2.738882405 | Cdca3         | ENSMUSG00000090394  | 0.04210887 | 1.875891293 | 4930523C07Rik |
| ENSMUSG00000073705  | 0.044023 | -2.755762022 | Apitd1        | ENSMUSG00000021365  | 0.02523502 | 1.874672581 | Nedd9         |
| ENSMUSG00000098318  | 0.034068 | -2.766110522 | 1190002F15Rik | ENSMUSG00000009281  | 0.01168061 | 1.874667772 | Rarres2       |
| ENSMUSG00000086496  | 0.011407 | -2.767471748 | Gm14204       | ENSMUSG00000027907  | 0.02057704 | 1.874589615 | S100a11       |
| ENSMUSG00000027559  | 0.013018 | -2.769611516 | Car3          | ENSMUSG000000021234 | 0.00376315 | 1.87433924  | Fam161b       |
| ENSMUSG00000035455  | 0.028732 | -2.771076764 | Figl1         | ENSMUSG00000028121  | 0.00549751 | 1.874024624 | Bcar3         |
| ENSMUSG00000017499  | 0.029505 | -2.773385903 | Cdc6          | ENSMUSG00000030772  | 0.00325982 | 1.874005949 | Dkk3          |
| ENSMUSG00000029755  | 0.011214 | -2.774030084 | Dlx5          | ENSMUSG00000041423  | 0.01545391 | 1.873729221 | Paqr6         |
| ENSMUSG00000025574  | 0.017255 | -2.82583136  | Tk1           | ENSMUSG00000073758  | 0.04372757 | 1.873532466 | Sh3d21        |
| ENSMUSG00000027331  | 0.014391 | -2.830431238 | Knstrn        | ENSMUSG00000002602  | 0.00257764 | 1.873245029 | Axl           |



|                     |          |              |               |                     |            |             |               |
|---------------------|----------|--------------|---------------|---------------------|------------|-------------|---------------|
| ENSMUSG00000078453  | 0.033698 | -2.843802387 | Abrac1        | ENSMUSG00000075304  | 0.04086271 | 1.87295999  | Sp5           |
| ENSMUSG00000027496  | 0.013587 | -2.875831058 | Aurka         | ENSMUSG00000035805  | 0.00024784 | 1.871693814 | Mlc1          |
| ENSMUSG00000017716  | 0.011407 | -2.876420298 | Birc5         | ENSMUSG00000037348  | 0.00100138 | 1.870594512 | Paqr7         |
| ENSMUSG00000044813  | 0.043708 | -2.882715664 | Shb           | ENSMUSG00000039904  | 0.00744949 | 1.870436934 | Gpr37         |
| ENSMUSG00000006398  | 0.005537 | -2.910094192 | Cdc20         | ENSMUSG00000073411  | 0.00071429 | 1.870229481 | H2-D1         |
| ENSMUSG00000037544  | 0.022756 | -2.910233297 | Dlgap5        | ENSMUSG00000042429  | 0.00064512 | 1.869635474 | Adora1        |
| ENSMUSG00000019942  | 0.006721 | -2.917683314 | Cdk1          | ENSMUSG00000031504  | 0.02825556 | 1.868952461 | Rab20         |
| ENSMUSG00000051378  | 0.011407 | -2.927459752 | Kif18b        | ENSMUSG00000027360  | 0.01393294 | 1.868541591 | Hdc           |
| ENSMUSG00000027306  | 0.006447 | -2.937429489 | Nusap1        | ENSMUSG00000036585  | 0.00691041 | 1.866348352 | Fgf1          |
| ENSMUSG00000030677  | 0.006303 | -2.938123607 | Kif22         | ENSMUSG00000031561  | 0.04559083 | 1.865997256 | Tenm3         |
| ENSMUSG00000027490  | 0.011197 | -2.943453114 | E2f1          | ENSMUSG00000022893  | 0.02650442 | 1.865622662 | Adamts1       |
| ENSMUSG00000000028  | 0.015195 | -2.949719299 | Cdc45         | ENSMUSG00000063600  | 0.04723367 | 1.86154547  | Egfm1         |
| ENSMUSG00000046295  | 0.0267   | -2.961893379 | Ankle1        | ENSMUSG00000075273  | 0.00573187 | 1.861098151 | Ttc30b        |
| ENSMUSG00000020808  | 0.009835 | -2.978656824 | Fam64a        | ENSMUSG00000052861  | 0.02980274 | 1.860494085 | Dnah6         |
| ENSMUSG00000032218  | 0.009591 | -2.98384271  | Ccnb2         | ENSMUSG00000026880  | 0.00235269 | 1.860264043 | Stom          |
| ENSMUSG00000039396  | 0.032239 | -3.013306282 | Neil3         | ENSMUSG00000005951  | 0.02351554 | 1.859687517 | Shpk          |
| ENSMUSG00000035683  | 0.018581 | -3.022154902 | Melk          | ENSMUSG00000042684  | 0.00486948 | 1.859048415 | Npl           |
| ENSMUSG00000055612  | 0.006265 | -3.035136385 | Cdca7         | ENSMUSG00000041343  | 0.00432246 | 1.859041563 | Ankrd42       |
| ENSMUSG00000062510  | 0.021994 | -3.045081973 | Nsl1          | ENSMUSG00000000058  | 0.02691782 | 1.858461061 | Cav2          |
| ENSMUSG00000020649  | 0.005537 | -3.067570572 | Rrm2          | ENSMUSG00000041660  | 0.01625976 | 1.858224022 | Bbox1         |
| ENSMUSG00000018169  | 0.011197 | -3.106831106 | Mfng          | ENSMUSG00000041809  | 0.00925865 | 1.85664931  | Efhc1         |
| ENSMUSG00000021965  | 0.023014 | -3.12338142  | Ska3          | ENSMUSG00000020604  | 0.00350759 | 1.855759941 | Arsg          |
| ENSMUSG00000001403  | 0.005537 | -3.138006696 | Ube2c         | ENSMUSG000000031767 | 0.02130535 | 1.855309916 | Nudt7         |
| ENSMUSG00000048251  | 0.012919 | -3.152386057 | Bcl11b        | ENSMUSG00000110408  | 0.03989423 | 1.855302593 | RP23-357C16.1 |
| ENSMUSG00000044201  | 0.011921 | -3.16093019  | Cdc25c        | ENSMUSG00000038570  | 0.00719295 | 1.855281802 | Saxo2         |
| ENSMUSG00000040204  | 0.011197 | -3.171703617 | 2810417H13Rik | ENSMUSG00000030560  | 0.00677475 | 1.855141865 | Ctsc          |
| ENSMUSG00000068859  | 0.008446 | -3.185460525 | Sp9           | ENSMUSG00000002688  | 0.0130654  | 1.85503196  | Prkd1         |
| ENSMUSG000000021485 | 0.016984 | -3.193529309 | Mxd3          | ENSMUSG00000034227  | 0.00263037 | 1.851657502 | Foxj1         |
| ENSMUSG00000005470  | 0.015204 | -3.215246748 | Asf1b         | ENSMUSG00000055541  | 0.03231324 | 1.85061012  | Lair1         |
| ENSMUSG00000022945  | 0.018581 | -3.218778844 | Chaf1b        | ENSMUSG00000035473  | 0.00924829 | 1.849364913 | Galm          |
| ENSMUSG00000028873  | 0.005537 | -3.2260937   | Cdca8         | ENSMUSG00000031963  | 0.02361189 | 1.849049544 | Bmper         |
| ENSMUSG00000022422  | 0.034305 | -3.239593191 | Dscc1         | ENSMUSG00000069170  | 0.0099652  | 1.848818418 | Adgrv1        |
| ENSMUSG000000028702 | 0.021848 | -3.239925042 | Rad54l        | ENSMUSG00000060798  | 0.00858577 | 1.848793419 | Intu          |
| ENSMUSG00000022033  | 0.006054 | -3.263688151 | Pbk           | ENSMUSG00000037852  | 0.00022283 | 1.848708074 | Cpe           |
| ENSMUSG00000003436  | 0.005537 | -3.279086579 | Dli3          | ENSMUSG00000043621  | 0.01129321 | 1.847980558 | Ubxn10        |
| ENSMUSG00000038379  | 0.013018 | -3.299372519 | Ttk           | ENSMUSG00000021779  | 0.04075559 | 1.847750024 | Thrb          |
| ENSMUSG00000032783  | 0.018676 | -3.348536216 | Troap         | ENSMUSG00000026896  | 0.03942037 | 1.847069455 | Ifih1         |
| ENSMUSG00000030867  | 0.006303 | -3.356068592 | Plk1          | ENSMUSG000000039419 | 0.0019174  | 1.847010004 | Cntnap2       |
| ENSMUSG00000035551  | 0.005537 | -3.362338909 | Igfbpl1       | ENSMUSG00000036879  | 0.03965034 | 1.845851277 | Phkb          |
| ENSMUSG00000036223  | 0.044277 | -3.371441459 | Ska1          | ENSMUSG00000027488  | 0.03716966 | 1.84488962  | Snta1         |
| ENSMUSG00000086308  | 0.034068 | -3.371490547 | G630016G05Rik | ENSMUSG00000029186  | 0.02446945 | 1.843833769 | Pi4k2b        |
| ENSMUSG00000024056  | 0.011921 | -3.38637704  | Ndc80         | ENSMUSG00000031808  | 0.00040649 | 1.842915086 | Slc27a1       |
| ENSMUSG00000047171  | 0.036097 | -3.431750286 | Helt          | ENSMUSG00000045275  | 0.02935461 | 1.842409485 | Lca5l         |
| ENSMUSG00000039748  | 0.019552 | -3.460109357 | Exo1          | ENSMUSG00000040624  | 0.04556868 | 1.841736487 | Plekhg1       |
| ENSMUSG00000034883  | 0.038994 | -3.475195456 | Lrr1          | ENSMUSG00000021760  | 0.00649738 | 1.841336233 | Gpx8          |
| ENSMUSG00000041064  | 0.034732 | -3.476565916 | Pif1          | ENSMUSG00000070436  | 0.00041048 | 1.840229001 | Serpinh1      |
| ENSMUSG00000074476  | 0.007374 | -3.752119842 | Spc24         | ENSMUSG00000002808  | 0.00058524 | 1.839626003 | Epdr1         |
| ENSMUSG00000023391  | 0.004038 | -3.837241006 | Dlx2          | ENSMUSG00000090150  | 0.01008005 | 1.838112771 | Acad11        |
| ENSMUSG00000035946  | 0.034732 | -3.857529107 | Gsx2          | ENSMUSG00000062031  | 0.00295841 | 1.836457234 | Athl1         |
| ENSMUSG00000068614  | 0.045873 | -3.884837381 | Actc1         | ENSMUSG00000033059  | 0.00331774 | 1.836364821 | Pygb          |
| ENSMUSG00000027750  | 0.044277 | -4.139722115 | Postn         | ENSMUSG00000001663  | 0.00895248 | 1.8358467   | Gstt1         |
| ENSMUSG00000021933  | 0.047221 | -4.222115807 | Gucy1b2       | ENSMUSG00000039179  | 0.03271116 | 1.835768171 | Tekt5         |
| ENSMUSG00000041406  | 0.026577 | -4.917325039 | BC055324      | ENSMUSG00000023186  | 0.03870685 | 1.834843722 | Vwa5a         |
| ENSMUSG000000102548 | 0.034858 | -4.9942358   | Gm16701       | ENSMUSG00000018648  | 0.00450928 | 1.834293612 | Dusp14        |
| ENSMUSG00000060735  | 0.026267 | -5.38508721  | Rxfp3         | ENSMUSG00000026956  | 0.00194956 | 1.833959901 | Uap1l1        |
|                     |          |              |               | ENSMUSG00000022122  | 0.00514272 | 1.833530303 | Ednrb         |
|                     |          |              |               | ENSMUSG000000053783 | 0.03747537 | 1.833516677 | 1700016K19Rik |
|                     |          |              |               | ENSMUSG00000066258  | 0.04094488 | 1.833402357 | Trim12a       |
|                     |          |              |               | ENSMUSG000000020541 | 0.0021298  | 1.831422068 | Tom1l1        |
|                     |          |              |               | ENSMUSG00000002475  | 0.00283132 | 1.830552938 | Abhd3         |
|                     |          |              |               | ENSMUSG00000086810  | 0.0493856  | 1.830316881 | Gm13110       |
|                     |          |              |               | ENSMUSG00000002332  | 0.00069784 | 1.830129935 | Dhrs1         |
|                     |          |              |               | ENSMUSG00000006784  | 0.02531486 | 1.829176405 | Ttc25         |
|                     |          |              |               | ENSMUSG000000022037 | 0.00027782 | 1.827819937 | Clu           |
|                     |          |              |               | ENSMUSG00000027574  | 0.00693157 | 1.82766408  | Nkain4        |
|                     |          |              |               | ENSMUSG00000049154  | 0.01474809 | 1.827180125 | Fam183b       |
|                     |          |              |               | ENSMUSG00000033577  | 0.01163886 | 1.825505559 | Myo6          |
|                     |          |              |               | ENSMUSG00000019810  | 0.00199387 | 1.824634941 | Fuca2         |
|                     |          |              |               | ENSMUSG00000026749  | 0.00068656 | 1.824475943 | Nek6          |
|                     |          |              |               | ENSMUSG000000057176 | 0.0095017  | 1.82374384  | Ccdc189       |
|                     |          |              |               | ENSMUSG00000034706  | 0.00456061 | 1.823512461 | Dnaic2        |
|                     |          |              |               | ENSMUSG00000041957  | 0.02317315 | 1.822623787 | Pkp2          |
|                     |          |              |               | ENSMUSG00000038732  | 0.03228648 | 1.821766642 | Mboat1        |
|                     |          |              |               | ENSMUSG00000041845  | 0.03220887 | 1.821216227 | Rhod          |
|                     |          |              |               | ENSMUSG00000079022  | 0.02030134 | 1.821091907 | Col22a1       |

|                    |            |             |               |
|--------------------|------------|-------------|---------------|
| ENSMUSG00000034449 | 0.00820249 | 1.82063036  | Dhrs11        |
| ENSMUSG00000043289 | 0.04741453 | 1.820195098 | Mei4          |
| ENSMUSG00000019853 | 0.01428512 | 1.819752116 | Hebp2         |
| ENSMUSG00000032667 | 0.00100138 | 1.819102302 | Pon2          |
| ENSMUSG00000021236 | 0.02271266 | 1.819032386 | Entpd5        |
| ENSMUSG00000022707 | 0.00640743 | 1.818977586 | Gbe1          |
| ENSMUSG00000076435 | 0.00665252 | 1.817104281 | Acsf2         |
| ENSMUSG00000021373 | 0.00793891 | 1.816246595 | Cap2          |
| ENSMUSG00000024376 | 0.00938757 | 1.81356335  | Epb4114a      |
| ENSMUSG00000002985 | 0.00339108 | 1.813244694 | Apoe          |
| ENSMUSG00000041329 | 0.00086496 | 1.81302407  | Atp1b2        |
| ENSMUSG00000032849 | 0.01984664 | 1.812048735 | Abcc4         |
| ENSMUSG00000000957 | 0.00073387 | 1.811731575 | Mmp14         |
| ENSMUSG00000019817 | 0.01167308 | 1.811231716 | Plagl1        |
| ENSMUSG00000029596 | 0.01887026 | 1.810473838 | Sds1          |
| ENSMUSG00000035686 | 0.009183   | 1.810471172 | Thrsp         |
| ENSMUSG00000074579 | 0.02068171 | 1.810041645 | Lekr1         |
| ENSMUSG00000012126 | 0.0075958  | 1.809539993 | Ubxn11        |
| ENSMUSG00000045679 | 0.02198359 | 1.808666794 | Pqlc3         |
| ENSMUSG00000009731 | 0.02372143 | 1.808503216 | Kcnd1         |
| ENSMUSG00000070532 | 0.02945507 | 1.808345343 | Ccdc190       |
| ENSMUSG00000066595 | 0.03059861 | 1.808334375 | Mfsd7b        |
| ENSMUSG00000054720 | 0.03820727 | 1.807452421 | Lrrc8c        |
| ENSMUSG00000029211 | 0.03971022 | 1.80654146  | Gabra4        |
| ENSMUSG00000022906 | 0.01797239 | 1.803863837 | Parp9         |
| ENSMUSG00000020538 | 0.00047056 | 1.803345066 | Srebf1        |
| ENSMUSG00000017453 | 0.0025562  | 1.80292888  | Pipox         |
| ENSMUSG00000030934 | 0.00064512 | 1.802461548 | Oat           |
| ENSMUSG00000026628 | 0.00493821 | 1.801930807 | Atf3          |
| ENSMUSG00000005413 | 0.0008342  | 1.801479999 | Hmox1         |
| ENSMUSG00000095930 | 0.0014798  | 1.801245473 | Nim1k         |
| ENSMUSG00000027803 | 0.01541134 | 1.800764375 | Wwtr1         |
| ENSMUSG00000037617 | 0.02992701 | 1.800529923 | Spag1         |
| ENSMUSG00000027447 | 0.00219458 | 1.79779523  | Cst3          |
| ENSMUSG00000078490 | 0.03627975 | 1.797084131 | Cfap74        |
| ENSMUSG00000038530 | 0.0138189  | 1.796910063 | Rgs4          |
| ENSMUSG00000023905 | 0.02312817 | 1.796854295 | Tnfrsf12a     |
| ENSMUSG00000031373 | 0.0205984  | 1.795966469 | Car5b         |
| ENSMUSG00000100706 | 0.0497418  | 1.795786536 | Gm19744       |
| ENSMUSG00000028927 | 0.00453503 | 1.794965019 | Padi2         |
| ENSMUSG00000022912 | 0.02837062 | 1.794213041 | Pros1         |
| ENSMUSG00000053907 | 0.00050141 | 1.793583621 | Mat2a         |
| ENSMUSG00000049929 | 0.02504188 | 1.793111495 | Lpar4         |
| ENSMUSG00000031521 | 0.00263041 | 1.792062268 | Aga           |
| ENSMUSG00000010358 | 0.04135785 | 1.791232092 | Ifi35         |
| ENSMUSG00000020407 | 0.01379038 | 1.7910258   | Upp1          |
| ENSMUSG00000027217 | 0.01336951 | 1.790921732 | Tspan18       |
| ENSMUSG00000070407 | 0.03231584 | 1.789690603 | Hs3st3b1      |
| ENSMUSG00000022261 | 0.00603905 | 1.789254967 | Sdc2          |
| ENSMUSG00000030125 | 0.02732231 | 1.789163683 | Lrrc23        |
| ENSMUSG00000022505 | 0.00323563 | 1.788373636 | Emp2          |
| ENSMUSG00000052593 | 0.03641413 | 1.787915413 | Adam17        |
| ENSMUSG00000019124 | 0.0043124  | 1.787855453 | Scrn1         |
| ENSMUSG00000090523 | 0.00974766 | 1.787776734 | Gypc          |
| ENSMUSG00000021069 | 0.01190877 | 1.787135945 | Pygl          |
| ENSMUSG00000022236 | 0.04348398 | 1.786672834 | Ropn1l        |
| ENSMUSG00000020326 | 0.04073853 | 1.785493638 | Ccng1         |
| ENSMUSG00000000266 | 0.02539459 | 1.784361016 | Mid2          |
| ENSMUSG00000045064 | 0.02681168 | 1.783438036 | Zc2hc1c       |
| ENSMUSG00000022580 | 0.00276459 | 1.782932963 | Rhpn1         |
| ENSMUSG00000018459 | 0.00326762 | 1.782744026 | Slc13a3       |
| ENSMUSG00000027832 | 0.04466684 | 1.782170951 | Ptx3          |
| ENSMUSG00000032649 | 0.02198359 | 1.782095037 | Colgalt2      |
| ENSMUSG00000006711 | 0.02781703 | 1.781214512 | D130043K22Rik |
| ENSMUSG00000032281 | 0.00069784 | 1.780549633 | Acsgb1        |
| ENSMUSG00000026575 | 0.00493821 | 1.780247977 | Nme7          |
| ENSMUSG00000000555 | 0.02963886 | 1.780036662 | Itga5         |
| ENSMUSG00000020142 | 0.00350759 | 1.779110044 | Slc1a4        |
| ENSMUSG00000050732 | 0.02696629 | 1.778914298 | Vamp8         |
| ENSMUSG00000020672 | 0.01588724 | 1.778011937 | Sntg2         |
| ENSMUSG00000047205 | 0.01094911 | 1.777331031 | Dusp18        |
| ENSMUSG00000048416 | 0.00676738 | 1.77309119  | Mlf1          |
| ENSMUSG00000026611 | 0.01887419 | 1.773034412 | Spata17       |
| ENSMUSG00000003623 | 0.01887419 | 1.772171926 | Crot          |
| ENSMUSG00000078349 | 0.01699732 | 1.771460575 | AW011738      |

|                     |            |             |               |
|---------------------|------------|-------------|---------------|
| ENSMUSG00000032369  | 0.01147224 | 1.770763464 | Plscr1        |
| ENSMUSG00000017466  | 0.00188956 | 1.77027276  | Timp2         |
| ENSMUSG00000028268  | 0.03223536 | 1.770060154 | Gbp3          |
| ENSMUSG000000071103 | 0.00908042 | 1.769864856 | 1700029J07Rik |
| ENSMUSG00000040147  | 0.03560162 | 1.769251064 | Maob          |
| ENSMUSG00000022594  | 0.0104684  | 1.76823884  | Lynx1         |
| ENSMUSG00000022103  | 0.01284943 | 1.767888878 | Gfra2         |
| ENSMUSG00000072949  | 0.00517575 | 1.765801726 | Acot1         |
| ENSMUSG00000034353  | 0.01088098 | 1.765318625 | Ramp1         |
| ENSMUSG00000022816  | 0.00345831 | 1.764654179 | Fstl1         |
| ENSMUSG00000058135  | 0.00194369 | 1.764103911 | Gstm1         |
| ENSMUSG00000020415  | 0.01221763 | 1.763750018 | Pttg1         |
| ENSMUSG00000037902  | 0.00265725 | 1.763362059 | Sirpa         |
| ENSMUSG00000009585  | 0.00544597 | 1.762772434 | Apobec3       |
| ENSMUSG00000008206  | 0.00695071 | 1.761833902 | Cers4         |
| ENSMUSG00000028132  | 0.04722538 | 1.761671941 | Tmem56        |
| ENSMUSG00000032109  | 0.011359   | 1.761337564 | Nlrx1         |
| ENSMUSG00000050666  | 0.00643581 | 1.760642172 | Vstm4         |
| ENSMUSG00000024885  | 0.01164611 | 1.76002672  | Aldh3b1       |
| ENSMUSG00000027313  | 0.00345831 | 1.759589149 | Chac1         |
| ENSMUSG00000032085  | 0.00910965 | 1.7594149   | Tagln         |
| ENSMUSG00000043639  | 0.02536675 | 1.759121256 | Rbm20         |
| ENSMUSG00000024079  | 0.01244808 | 1.753980745 | Eif2ak2       |
| ENSMUSG00000032387  | 0.0085272  | 1.753834649 | Rbpms2        |
| ENSMUSG00000036885  | 0.03328992 | 1.753648544 | Arhgef26      |
| ENSMUSG00000022525  | 0.03293598 | 1.752867902 | Hrasls        |
| ENSMUSG00000090122  | 0.00344228 | 1.75084318  | Kcne1l        |
| ENSMUSG00000046718  | 0.02226656 | 1.749664361 | Bst2          |
| ENSMUSG00000032418  | 0.00231438 | 1.745824195 | Me1           |
| ENSMUSG00000028583  | 0.00228919 | 1.74574846  | Pdpm          |
| ENSMUSG00000020077  | 0.0483127  | 1.745524942 | Srgn          |
| ENSMUSG00000021306  | 0.00577439 | 1.745482898 | Gpr137b       |
| ENSMUSG00000023963  | 0.03334401 | 1.745336824 | Cyp39a1       |
| ENSMUSG00000024420  | 0.04527788 | 1.744666233 | Zfp521        |
| ENSMUSG00000110080  | 0.00530593 | 1.743805281 | RP23-4P23.1   |
| ENSMUSG00000026586  | 0.00843706 | 1.743315571 | Prrx1         |
| ENSMUSG00000026946  | 0.01699732 | 1.742552128 | Nmi           |
| ENSMUSG00000035778  | 0.0298118  | 1.742473343 | Ggta1         |
| ENSMUSG00000025780  | 0.00533041 | 1.740673215 | Itih5         |
| ENSMUSG00000033192  | 0.04807108 | 1.738782695 | Lpcat2        |
| ENSMUSG00000030986  | 0.00235269 | 1.736987558 | Dhx32         |
| ENSMUSG00000020000  | 0.02862989 | 1.736975978 | Moxd1         |
| ENSMUSG00000039097  | 0.03442622 | 1.736181578 | Rln1          |
| ENSMUSG00000024620  | 0.01983494 | 1.736036961 | Pdgfrb        |
| ENSMUSG00000031875  | 0.00403675 | 1.735128239 | Cmtm3         |
| ENSMUSG00000064246  | 0.02174539 | 1.735096197 | Chil1         |
| ENSMUSG00000030101  | 0.00599045 | 1.734721946 | Sumf1         |
| ENSMUSG00000035376  | 0.00242016 | 1.73360699  | Hacd2         |
| ENSMUSG00000022790  | 0.00550314 | 1.732056147 | Igsf11        |
| ENSMUSG00000031932  | 0.00530593 | 1.730841691 | Gpr83         |
| ENSMUSG00000073633  | 0.01517111 | 1.730044133 | Fbxo36        |
| ENSMUSG00000042613  | 0.00078761 | 1.729077045 | Pbxip1        |
| ENSMUSG00000054612  | 0.04534381 | 1.728718757 | Mgmt          |
| ENSMUSG00000027977  | 0.03540411 | 1.727970704 | Ndst3         |
| ENSMUSG00000048332  | 0.00203034 | 1.727790727 | Lhfp          |
| ENSMUSG00000029781  | 0.00340342 | 1.72696968  | Fkbp9         |
| ENSMUSG00000036356  | 0.03005392 | 1.726709297 | Csgalnact1    |
| ENSMUSG00000021884  | 0.00385188 | 1.726627685 | Hacl1         |
| ENSMUSG00000020728  | 0.0244491  | 1.726043434 | Cep112        |
| ENSMUSG00000022763  | 0.00544791 | 1.725838885 | Aifm3         |
| ENSMUSG00000059482  | 0.00385188 | 1.724476837 | 2610301B20Rik |
| ENSMUSG00000056458  | 0.00872196 | 1.724107535 | Mok           |
| ENSMUSG00000075702  | 0.0206928  | 1.722624118 | Selm          |
| ENSMUSG00000033282  | 0.03762654 | 1.722072206 | Rpgrip1l      |
| ENSMUSG00000007872  | 0.00563236 | 1.721942096 | Id3           |
| ENSMUSG00000029167  | 0.00319626 | 1.720205703 | Ppargc1a      |
| ENSMUSG00000055676  | 0.04251673 | 1.719457978 | Gm5069        |
| ENSMUSG00000038296  | 0.01509473 | 1.719391635 | Galnt18       |
| ENSMUSG00000036611  | 0.001966   | 1.718380506 | Eepd1         |
| ENSMUSG00000036292  | 0.04202162 | 1.71545836  | Gramd1c       |
| ENSMUSG00000023809  | 0.02933789 | 1.714494321 | Rps6ka2       |
| ENSMUSG00000020733  | 0.00102768 | 1.713848251 | Slc9a3r1      |
| ENSMUSG00000022565  | 0.00406795 | 1.713401863 | Plec          |
| ENSMUSG00000047407  | 0.01152573 | 1.713006245 | Tgif1         |
| ENSMUSG00000029095  | 0.00769378 | 1.712914832 | Ablim2        |

|                     |            |             |               |
|---------------------|------------|-------------|---------------|
| ENSMUSG00000026185  | 0.00739191 | 1.712449153 | Igfbp5        |
| ENSMUSG00000035032  | 0.04396298 | 1.712270025 | Nek11         |
| ENSMUSG00000037892  | 0.02505064 | 1.71105746  | Pcdh18        |
| ENSMUSG00000020937  | 0.02750923 | 1.708760029 | Plcd3         |
| ENSMUSG00000035095  | 0.01427324 | 1.708415261 | Fam167a       |
| ENSMUSG00000024180  | 0.03725476 | 1.707774455 | Tmem8         |
| ENSMUSG00000000958  | 0.02703484 | 1.707690012 | Slc7a7        |
| ENSMUSG00000029212  | 0.00764139 | 1.70664379  | Gabrb1        |
| ENSMUSG00000030276  | 0.01254275 | 1.706497723 | Ttll3         |
| ENSMUSG00000072762  | 0.02823485 | 1.706172961 | 4930522L14Rik |
| ENSMUSG00000072946  | 0.01833628 | 1.705957366 | Ptgr2         |
| ENSMUSG00000043629  | 0.01474809 | 1.705630771 | 1700019D03Rik |
| ENSMUSG00000060268  | 0.04880371 | 1.705257683 | Gm1661        |
| ENSMUSG00000030770  | 0.01339023 | 1.70458938  | Parva         |
| ENSMUSG00000021071  | 0.00753273 | 1.701822819 | Trim9         |
| ENSMUSG00000026227  | 0.00564044 | 1.701576368 | 2810459M11Rik |
| ENSMUSG00000053161  | 0.04123624 | 1.700194357 | Daw1          |
| ENSMUSG00000001918  | 0.01131733 | 1.699359289 | Slc1a5        |
| ENSMUSG00000026042  | 0.01539491 | 1.699260383 | Col5a2        |
| ENSMUSG00000032285  | 0.02963886 | 1.699030733 | Dnaja4        |
| ENSMUSG00000020930  | 0.02094303 | 1.698514444 | Ccdc103       |
| ENSMUSG00000020614  | 0.0135434  | 1.697219241 | Fam20a        |
| ENSMUSG00000005803  | 0.01333338 | 1.696790164 | Sqrdl         |
| ENSMUSG00000051439  | 0.04045433 | 1.693787281 | Cd14          |
| ENSMUSG00000056144  | 0.02314095 | 1.693365892 | Trim34a       |
| ENSMUSG00000051427  | 0.02844867 | 1.69304437  | Ccdc157       |
| ENSMUSG00000055782  | 0.0479567  | 1.692752803 | Abcd2         |
| ENSMUSG00000060961  | 0.00192927 | 1.692604615 | Slc4a4        |
| ENSMUSG00000024782  | 0.00208953 | 1.692410038 | Ak3           |
| ENSMUSG00000030029  | 0.0030225  | 1.691789746 | Lrig1         |
| ENSMUSG00000046240  | 0.001669   | 1.690048148 | Hepacam       |
| ENSMUSG00000033016  | 0.01227483 | 1.689743147 | Nfatc1        |
| ENSMUSG00000040548  | 0.02732231 | 1.689728812 | Tex2          |
| ENSMUSG00000001891  | 0.00675984 | 1.689691314 | Ugp2          |
| ENSMUSG00000052397  | 0.00355916 | 1.688711573 | Ezr           |
| ENSMUSG00000020388  | 0.00846325 | 1.687729548 | Pdlim4        |
| ENSMUSG00000004902  | 0.00095611 | 1.686888763 | Slc25a18      |
| ENSMUSG000000017756 | 0.02849925 | 1.685963446 | Slc12a7       |
| ENSMUSG00000003526  | 0.00676738 | 1.685547932 | Prodh         |
| ENSMUSG00000028597  | 0.03355158 | 1.685118704 | Gpx7          |
| ENSMUSG00000048794  | 0.01427324 | 1.684230439 | Cfap100       |
| ENSMUSG00000027562  | 0.00249109 | 1.683655589 | Car2          |
| ENSMUSG00000024227  | 0.00882011 | 1.683548883 | Pdzph1        |
| ENSMUSG00000034361  | 0.00330073 | 1.683171065 | Cpne2         |
| ENSMUSG00000029386  | 0.00395612 | 1.683018593 | Tctn2         |
| ENSMUSG00000040697  | 0.03863099 | 1.68162904  | Dnajc16       |
| ENSMUSG00000025453  | 0.01794561 | 1.681211632 | Nnt           |
| ENSMUSG00000000693  | 0.01090348 | 1.680683145 | Loxl3         |
| ENSMUSG00000026385  | 0.00820249 | 1.680512789 | Dbi           |
| ENSMUSG00000025351  | 0.00665252 | 1.679048666 | Cd63          |
| ENSMUSG00000028278  | 0.03600915 | 1.678425528 | Rragd         |
| ENSMUSG00000031207  | 0.01179044 | 1.677259744 | Msn           |
| ENSMUSG00000022620  | 0.0087283  | 1.677081681 | Arsa          |
| ENSMUSG00000001942  | 0.01346914 | 1.676453595 | Siae          |
| ENSMUSG00000047992  | 0.01068942 | 1.676410954 | Fam69c        |
| ENSMUSG00000031880  | 0.04384094 | 1.67635247  | Rrad          |
| ENSMUSG00000029769  | 0.00398118 | 1.67614213  | Ccdc136       |
| ENSMUSG00000048022  | 0.0411698  | 1.675528866 | Tmem229a      |
| ENSMUSG00000019803  | 0.00667386 | 1.675186836 | Nr2e1         |
| ENSMUSG00000086502  | 0.02753037 | 1.674569848 | B130055M24Rik |
| ENSMUSG00000063704  | 0.01407668 | 1.674261846 | Mapk15        |
| ENSMUSG00000008734  | 0.01419251 | 1.674145353 | Gprc5b        |
| ENSMUSG00000026223  | 0.00095895 | 1.674080519 | Itm2c         |
| ENSMUSG00000030894  | 0.00190265 | 1.673989119 | Tpp1          |
| ENSMUSG00000030428  | 0.00061578 | 1.673416224 | Ttyh1         |
| ENSMUSG00000034401  | 0.0353623  | 1.673382929 | Spata6        |
| ENSMUSG00000028214  | 0.00742829 | 1.672895819 | Gem           |
| ENSMUSG00000052062  | 0.01096649 | 1.672667379 | Pard3b        |
| ENSMUSG00000059182  | 0.00679845 | 1.671937026 | Skap2         |
| ENSMUSG00000061758  | 0.00824714 | 1.67027275  | Akr1b10       |
| ENSMUSG00000015090  | 0.01090121 | 1.670086042 | Ptgds         |
| ENSMUSG00000044037  | 0.00924829 | 1.669266242 | Als2cl        |
| ENSMUSG00000024059  | 0.00530593 | 1.669132804 | Clip4         |
| ENSMUSG00000049571  | 0.02533527 | 1.668783849 | Cfap46        |
| ENSMUSG00000021130  | 0.01067882 | 1.667976052 | Galnt16       |

|                    |            |             |               |
|--------------------|------------|-------------|---------------|
| ENSMUSG00000017390 | 0.00040802 | 1.667768418 | Aldoc         |
| ENSMUSG00000026200 | 0.01509715 | 1.667731801 | Glb1l         |
| ENSMUSG00000029153 | 0.01071782 | 1.667167218 | Ociad2        |
| ENSMUSG00000020777 | 0.01411979 | 1.665532963 | Acox1         |
| ENSMUSG00000010051 | 0.0188068  | 1.665163109 | Hyal1         |
| ENSMUSG00000014846 | 0.02144054 | 1.664901561 | Tppp3         |
| ENSMUSG00000024812 | 0.02487994 | 1.663470518 | Tjpb          |
| ENSMUSG00000037656 | 0.00474303 | 1.663078702 | Slc20a2       |
| ENSMUSG00000038302 | 0.02094303 | 1.662663719 | Lace1         |
| ENSMUSG00000028199 | 0.00688988 | 1.662440041 | Cryz          |
| ENSMUSG00000019820 | 0.00778061 | 1.662069675 | Utrn          |
| ENSMUSG00000028420 | 0.01461137 | 1.661481562 | Tmem38b       |
| ENSMUSG00000029178 | 0.00287794 | 1.661159824 | Klf3          |
| ENSMUSG00000030849 | 0.03697605 | 1.660626721 | Fgfr2         |
| ENSMUSG00000043164 | 0.01712795 | 1.660400819 | Tmem212       |
| ENSMUSG00000034035 | 0.03828067 | 1.660215201 | Ccdc17        |
| ENSMUSG00000039037 | 0.00525047 | 1.658719807 | St6galnac5    |
| ENSMUSG00000013275 | 0.0279032  | 1.658152551 | Slc41a1       |
| ENSMUSG00000020263 | 0.00414814 | 1.657195987 | Appl2         |
| ENSMUSG00000022574 | 0.01142729 | 1.656879328 | Naprt         |
| ENSMUSG00000028189 | 0.03513546 | 1.655548328 | Ctbs          |
| ENSMUSG0000002980  | 0.03060077 | 1.654947985 | Bcam          |
| ENSMUSG00000018672 | 0.02892559 | 1.654876999 | Cop2          |
| ENSMUSG00000020175 | 0.00403406 | 1.654773965 | Rab36         |
| ENSMUSG00000033276 | 0.01819837 | 1.653656404 | Stk36         |
| ENSMUSG00000035133 | 0.04137633 | 1.652986113 | Arhgap5       |
| ENSMUSG00000019789 | 0.01955725 | 1.651645668 | Hey2          |
| ENSMUSG00000030323 | 0.01481122 | 1.65123854  | lft122        |
| ENSMUSG00000026003 | 0.00161647 | 1.651007591 | Acadl         |
| ENSMUSG00000055137 | 0.01237583 | 1.648980943 | Sugct         |
| ENSMUSG00000021318 | 0.024525   | 1.648098777 | Gli3          |
| ENSMUSG00000024302 | 0.00993475 | 1.647850231 | Dtna          |
| ENSMUSG00000048581 | 0.01724946 | 1.647368264 | E130311K13Rik |
| ENSMUSG00000040006 | 0.00514272 | 1.646175193 | Ginm1         |
| ENSMUSG00000020389 | 0.02828691 | 1.645828799 | Cdkl3         |
| ENSMUSG00000001555 | 0.01179044 | 1.645605985 | Fkbp10        |
| ENSMUSG00000029710 | 0.01117141 | 1.64365649  | Ephb4         |
| ENSMUSG00000028391 | 0.01241479 | 1.643189902 | Wdr31         |
| ENSMUSG00000040997 | 0.00080814 | 1.643086296 | Abhd4         |
| ENSMUSG00000000567 | 0.00096426 | 1.642988792 | Sox9          |
| ENSMUSG00000055254 | 0.00069784 | 1.64270965  | Ntrk2         |
| ENSMUSG00000038023 | 0.02810537 | 1.642640879 | Atp6v0a2      |
| ENSMUSG00000028128 | 0.00282479 | 1.641968486 | F3            |
| ENSMUSG00000060703 | 0.01189399 | 1.641296753 | Cd302         |
| ENSMUSG00000036908 | 0.03981601 | 1.640030069 | Unc93b1       |
| ENSMUSG00000042745 | 0.00866271 | 1.639896436 | ld1           |
| ENSMUSG00000057103 | 0.0212265  | 1.639795036 | Nat8f1        |
| ENSMUSG00000007097 | 0.0006278  | 1.639754495 | Atp1a2        |
| ENSMUSG00000049555 | 0.01359707 | 1.63948669  | Tmie          |
| ENSMUSG00000025937 | 0.04542783 | 1.639467265 | Lactb2        |
| ENSMUSG00000021848 | 0.00652254 | 1.639398796 | Otx2          |
| ENSMUSG00000037523 | 0.03054428 | 1.639388036 | Mavs          |
| ENSMUSG00000028691 | 0.00186278 | 1.638619787 | Prdx1         |
| ENSMUSG00000015312 | 0.03748546 | 1.638001284 | Gadd45b       |
| ENSMUSG00000057766 | 0.01768529 | 1.637985091 | Ankrd29       |
| ENSMUSG00000043065 | 0.01106013 | 1.63751058  | Spice1        |
| ENSMUSG00000027765 | 0.03069262 | 1.636949662 | P2ry1         |
| ENSMUSG00000036854 | 0.02711157 | 1.636462732 | Hspb6         |
| ENSMUSG00000030087 | 0.01387536 | 1.635746139 | Klf15         |
| ENSMUSG00000025757 | 0.02286122 | 1.633998374 | Hspa4l        |
| ENSMUSG00000024665 | 0.00091529 | 1.633194416 | Fads2         |
| ENSMUSG00000025283 | 0.00601868 | 1.632739226 | Sat1          |
| ENSMUSG00000039234 | 0.02505064 | 1.632597383 | Sec24d        |
| ENSMUSG00000020044 | 0.04241046 | 1.632053871 | Timp3         |
| ENSMUSG00000010663 | 0.00684376 | 1.630310659 | Fads1         |
| ENSMUSG00000025498 | 0.02891573 | 1.629875693 | Irf7          |
| ENSMUSG00000010095 | 0.00129716 | 1.629827197 | Slc3a2        |
| ENSMUSG00000036095 | 0.02740917 | 1.629218771 | Dgkb          |
| ENSMUSG00000030605 | 0.00054477 | 1.628747499 | Mfge8         |
| ENSMUSG00000016664 | 0.00938757 | 1.62874068  | Pacsin2       |
| ENSMUSG00000034573 | 0.03113354 | 1.62850819  | Ptpn13        |
| ENSMUSG00000062646 | 0.01312108 | 1.628417207 | Ganc          |
| ENSMUSG00000002108 | 0.03224458 | 1.628405782 | Nr1h3         |
| ENSMUSG00000021785 | 0.04375782 | 1.628163195 | Ngly1         |
| ENSMUSG00000093460 | 0.00423308 | 1.627838832 | Six3os1       |

|                    |            |             |               |
|--------------------|------------|-------------|---------------|
| ENSMUSG00000038213 | 0.02022429 | 1.626358436 | Tapbpl        |
| ENSMUSG00000056938 | 0.02724292 | 1.626080548 | Acbd4         |
| ENSMUSG00000033083 | 0.03685737 | 1.626015881 | Tbc1d4        |
| ENSMUSG00000032246 | 0.04047325 | 1.625953213 | Calml4        |
| ENSMUSG00000037016 | 0.04249995 | 1.625309429 | Frem2         |
| ENSMUSG00000032609 | 0.00474474 | 1.625197854 | Klhdc8b       |
| ENSMUSG00000047793 | 0.04329834 | 1.624386032 | Sned1         |
| ENSMUSG00000020889 | 0.00649787 | 1.624279526 | Nr1d1         |
| ENSMUSG00000028064 | 0.02393816 | 1.623460057 | Sema4a        |
| ENSMUSG00000027078 | 0.01887026 | 1.623388411 | Ube2l6        |
| ENSMUSG00000028576 | 0.0041561  | 1.622906482 | Ift74         |
| ENSMUSG00000028573 | 0.02377325 | 1.622885631 | Fggy          |
| ENSMUSG00000031119 | 0.00883752 | 1.62285064  | Gpc4          |
| ENSMUSG00000055652 | 0.00656711 | 1.622654499 | Klhl25        |
| ENSMUSG00000024805 | 0.03550302 | 1.622547198 | Pcgf5         |
| ENSMUSG00000027221 | 0.00456679 | 1.622471582 | Chst1         |
| ENSMUSG00000028378 | 0.04793006 | 1.622398271 | Ptgr1         |
| ENSMUSG00000040549 | 0.04277122 | 1.6216042   | Ckap5         |
| ENSMUSG00000021186 | 0.02342767 | 1.620986887 | Fbln5         |
| ENSMUSG00000030107 | 0.00738958 | 1.620129618 | Usp18         |
| ENSMUSG00000099907 | 0.04308083 | 1.619816062 | Gm10421       |
| ENSMUSG00000026482 | 0.00501476 | 1.619739634 | Rgl1          |
| ENSMUSG00000028047 | 0.0111831  | 1.619263406 | Thbs3         |
| ENSMUSG00000026827 | 0.00392732 | 1.618172519 | Gpd2          |
| ENSMUSG00000063605 | 0.03480872 | 1.617530645 | Ccdc102a      |
| ENSMUSG00000027560 | 0.01072221 | 1.615861548 | Dok5          |
| ENSMUSG00000073600 | 0.02888953 | 1.614492084 | Prob1         |
| ENSMUSG00000078451 | 0.02524514 | 1.614376552 | Ppil6         |
| ENSMUSG00000021408 | 0.03409088 | 1.614126212 | Ripk1         |
| ENSMUSG00000035279 | 0.04012413 | 1.613854696 | Ssc5d         |
| ENSMUSG00000097756 | 0.02904416 | 1.613442099 | A730056A06Rik |
| ENSMUSG00000034235 | 0.03317495 | 1.613357954 | Usp54         |
| ENSMUSG00000053334 | 0.01113632 | 1.613088029 | Ficd          |
| ENSMUSG00000049624 | 0.02452035 | 1.611152975 | Slc17a5       |
| ENSMUSG00000032224 | 0.02453443 | 1.609307874 | Fam81a        |
| ENSMUSG00000074063 | 0.03186319 | 1.60928594  | Osgin1        |
| ENSMUSG00000067818 | 0.01887502 | 1.608572001 | Myl9          |
| ENSMUSG00000029093 | 0.04307345 | 1.60795923  | Sorcs2        |
| ENSMUSG00000028893 | 0.00291773 | 1.607827935 | Sesn2         |
| ENSMUSG00000026893 | 0.04391688 | 1.607735015 | Gca           |
| ENSMUSG0000007891  | 0.00142379 | 1.607548904 | Ctsd          |
| ENSMUSG00000041598 | 0.00209395 | 1.606927157 | Cdc42ep4      |
| ENSMUSG00000031539 | 0.009183   | 1.605714002 | Ap3m2         |
| ENSMUSG00000030281 | 0.03503753 | 1.603673165 | Il17rc        |
| ENSMUSG00000061533 | 0.04908223 | 1.603515754 | Cep128        |
| ENSMUSG00000060802 | 0.00530593 | 1.60293669  | B2m           |
| ENSMUSG00000026728 | 0.00326378 | 1.6023205   | Vim           |
| ENSMUSG00000024892 | 0.00263037 | 1.60217898  | Pcx           |
| ENSMUSG00000023067 | 0.01295487 | 1.602113495 | Cdkn1a        |
| ENSMUSG00000032350 | 0.01581481 | 1.601380201 | Gclc          |
| ENSMUSG00000044786 | 0.00382871 | 1.600934643 | Zfp36         |
| ENSMUSG00000053646 | 0.02480646 | 1.599482214 | Plxnb1        |
| ENSMUSG00000097789 | 0.04005573 | 1.595123527 | Gm2115        |
| ENSMUSG00000030545 | 0.01077342 | 1.595107009 | Pex11a        |
| ENSMUSG00000021420 | 0.00530593 | 1.595088508 | Fars2         |
| ENSMUSG00000020432 | 0.00542181 | 1.594770595 | Tcn2          |
| ENSMUSG00000022440 | 0.00816641 | 1.594388766 | C1qtnf6       |
| ENSMUSG00000011154 | 0.04575233 | 1.594221502 | Cfap161       |
| ENSMUSG00000040759 | 0.01572527 | 1.593870185 | Cmtm5         |
| ENSMUSG00000025492 | 0.03341388 | 1.593867859 | Iftm3         |
| ENSMUSG00000010660 | 0.00748485 | 1.5934181   | Plcd1         |
| ENSMUSG00000028530 | 0.01090882 | 1.592936385 | Jak1          |
| ENSMUSG00000039745 | 0.04865198 | 1.592460065 | Htatip2       |
| ENSMUSG00000035910 | 0.03525234 | 1.591164174 | Dcdc2a        |
| ENSMUSG00000041654 | 0.00475123 | 1.59002487  | Slc39a11      |
| ENSMUSG00000033350 | 0.04668643 | 1.588669779 | Chst2         |
| ENSMUSG00000029156 | 0.024525   | 1.588455918 | Sgcb          |
| ENSMUSG00000024357 | 0.01031914 | 1.588220775 | Sil1          |
| ENSMUSG00000036972 | 0.00677734 | 1.588022488 | Zic4          |
| ENSMUSG00000029778 | 0.02264697 | 1.587884983 | Adcyap1r1     |
| ENSMUSG00000040260 | 0.02795149 | 1.587299869 | Daam2         |
| ENSMUSG00000037624 | 0.00897408 | 1.58623057  | Kcnk2         |
| ENSMUSG00000021013 | 0.01988762 | 1.586066166 | Ttc8          |
| ENSMUSG00000022382 | 0.00263041 | 1.585562565 | Wnt7b         |
| ENSMUSG00000021796 | 0.02536675 | 1.585503525 | Bmpr1a        |

|                    |            |             |               |
|--------------------|------------|-------------|---------------|
| ENSMUSG00000037966 | 0.03185226 | 1.58462795  | Ninj1         |
| ENSMUSG00000020319 | 0.0153772  | 1.584304351 | Wdpcp         |
| ENSMUSG00000028517 | 0.00052082 | 1.583612752 | Plpp3         |
| ENSMUSG00000017009 | 0.00474303 | 1.583339772 | Sdc4          |
| ENSMUSG00000042797 | 0.01934179 | 1.583064216 | Aqp11         |
| ENSMUSG00000045817 | 0.01292639 | 1.582358752 | Zfp36l2       |
| ENSMUSG00000021474 | 0.00589724 | 1.581691243 | Sfxn1         |
| ENSMUSG00000056737 | 0.04326056 | 1.580815141 | Capg          |
| ENSMUSG00000000751 | 0.00403406 | 1.57950925  | Rpa1          |
| ENSMUSG00000055737 | 0.04216091 | 1.579086458 | Ghr           |
| ENSMUSG00000067279 | 0.011359   | 1.578912364 | Ppp1r3c       |
| ENSMUSG00000020707 | 0.01711666 | 1.578298621 | Rnf135        |
| ENSMUSG00000026672 | 0.01171148 | 1.577410995 | Optn          |
| ENSMUSG00000048388 | 0.01900633 | 1.577138994 | Fam171b       |
| ENSMUSG00000018849 | 0.02892559 | 1.576756352 | Wwc1          |
| ENSMUSG00000020638 | 0.04152255 | 1.575555483 | Cmpk2         |
| ENSMUSG00000021094 | 0.01132879 | 1.574876921 | Dhrs7         |
| ENSMUSG00000007987 | 0.01096649 | 1.57319279  | Ift22         |
| ENSMUSG00000034903 | 0.03971022 | 1.572727217 | Cobll1        |
| ENSMUSG00000018217 | 0.00414814 | 1.572577861 | Pmp22         |
| ENSMUSG00000002459 | 0.00392425 | 1.572297613 | Rgs20         |
| ENSMUSG00000020570 | 0.01249461 | 1.571542115 | Sypl          |
| ENSMUSG00000044986 | 0.02014805 | 1.57151751  | Tst           |
| ENSMUSG00000053070 | 0.03110128 | 1.569007973 | 9230110C19Rik |
| ENSMUSG00000007041 | 0.01188729 | 1.567799449 | Clic1         |
| ENSMUSG00000032470 | 0.00508501 | 1.566778183 | Mras          |
| ENSMUSG00000016526 | 0.04998263 | 1.56511672  | Dyrk3         |
| ENSMUSG00000024588 | 0.01113632 | 1.564859004 | Fech          |
| ENSMUSG00000020085 | 0.02310113 | 1.564853722 | Aifm2         |
| ENSMUSG00000028944 | 0.00475123 | 1.564495464 | Prkag2        |
| ENSMUSG00000036120 | 0.01241479 | 1.564358039 | Rfxank        |
| ENSMUSG00000053113 | 0.00650062 | 1.564274138 | Socs3         |
| ENSMUSG00000039934 | 0.01780071 | 1.563722696 | Gsap          |
| ENSMUSG00000037594 | 0.01237583 | 1.563315362 | BC022687      |
| ENSMUSG00000023909 | 0.00296363 | 1.562576006 | Paqr4         |
| ENSMUSG00000024661 | 0.01728734 | 1.561637323 | Fth1          |
| ENSMUSG00000040370 | 0.00509793 | 1.561038867 | Lyrn5         |
| ENSMUSG00000022508 | 0.03977258 | 1.559837495 | Bcl6          |
| ENSMUSG00000025008 | 0.01524139 | 1.558838837 | Tctn3         |
| ENSMUSG00000052102 | 0.0091453  | 1.55857641  | Gnpda1        |
| ENSMUSG00000036606 | 0.03731046 | 1.557854173 | Plxnb2        |
| ENSMUSG0000003559  | 0.0205984  | 1.557379882 | As3mt         |
| ENSMUSG00000017754 | 0.00512643 | 1.557328529 | Pltp          |
| ENSMUSG00000028108 | 0.03519057 | 1.556855227 | Ecm1          |
| ENSMUSG00000063145 | 0.02781703 | 1.556731702 | Bbs5          |
| ENSMUSG00000036368 | 0.03206237 | 1.555329537 | Rmdn2         |
| ENSMUSG00000028124 | 0.00812425 | 1.554713105 | Gclm          |
| ENSMUSG00000020895 | 0.0365532  | 1.554610885 | Tmem107       |
| ENSMUSG00000040618 | 0.00816641 | 1.554261948 | Pck2          |
| ENSMUSG00000036995 | 0.02114009 | 1.55397873  | Asap3         |
| ENSMUSG00000028607 | 0.00656711 | 1.552405392 | Cpt2          |
| ENSMUSG00000021728 | 0.01068942 | 1.551370832 | Emb           |
| ENSMUSG00000025006 | 0.00202431 | 1.550975913 | Sorbs1        |
| ENSMUSG00000030225 | 0.01828578 | 1.550348295 | Dera          |
| ENSMUSG00000031024 | 0.02599926 | 1.549714535 | St5           |
| ENSMUSG00000037060 | 0.03821136 | 1.549356995 | Prkcdbp       |
| ENSMUSG00000066643 | 0.04151084 | 1.548871884 | Wdr35         |
| ENSMUSG00000019437 | 0.01273538 | 1.548197173 | Tlcd1         |
| ENSMUSG00000058486 | 0.01611275 | 1.548179534 | Wdr91         |
| ENSMUSG00000027739 | 0.02777518 | 1.547678292 | Rab33b        |
| ENSMUSG00000026664 | 0.00601868 | 1.547174998 | Phyh          |
| ENSMUSG00000032010 | 0.01093232 | 1.547052947 | Usp2          |
| ENSMUSG00000021871 | 0.01794616 | 1.54693784  | Pnp           |
| ENSMUSG00000022340 | 0.00993495 | 1.54681841  | Sybu          |
| ENSMUSG00000074158 | 0.04896549 | 1.54592891  | Zfp976        |
| ENSMUSG00000064036 | 0.01312108 | 1.545824541 | Mro           |
| ENSMUSG00000032121 | 0.01887502 | 1.545815228 | Tmem218       |
| ENSMUSG00000013698 | 0.00060047 | 1.545521849 | Pea15a        |
| ENSMUSG00000021508 | 0.01562252 | 1.544905938 | Cxcl14        |
| ENSMUSG00000026433 | 0.02409    | 1.544560513 | Rab29         |
| ENSMUSG00000031765 | 0.01819837 | 1.543287854 | Mt1           |
| ENSMUSG00000072066 | 0.04516171 | 1.543221026 | 6720489N17Rik |
| ENSMUSG00000053931 | 0.00087352 | 1.542964945 | Cnn3          |
| ENSMUSG00000028766 | 0.00620711 | 1.5425833   | Alpl          |
| ENSMUSG00000040138 | 0.01124839 | 1.542132066 | Ndp           |

|                    |            |             |               |
|--------------------|------------|-------------|---------------|
| ENSMUSG00000026202 | 0.02437787 | 1.541954128 | Tuba4a        |
| ENSMUSG00000030538 | 0.03074773 | 1.541281627 | Cib1          |
| ENSMUSG00000056116 | 0.0134619  | 1.540830479 | H2-T22        |
| ENSMUSG00000029049 | 0.0291493  | 1.539974006 | Morn1         |
| ENSMUSG00000006301 | 0.00748485 | 1.537868348 | Tmbim1        |
| ENSMUSG00000001418 | 0.01123193 | 1.537296745 | Glmf          |
| ENSMUSG00000029570 | 0.00562651 | 1.537159295 | Lfng          |
| ENSMUSG00000095362 | 0.04391688 | 1.536597321 | Gm14325       |
| ENSMUSG00000022272 | 0.00665113 | 1.535109183 | Myo10         |
| ENSMUSG00000054196 | 0.01438179 | 1.535007645 | Cthrc1        |
| ENSMUSG00000024251 | 0.02980274 | 1.534597983 | Thada         |
| ENSMUSG00000022106 | 0.01072402 | 1.53447577  | Rcbb2         |
| ENSMUSG00000041801 | 0.01819837 | 1.532915119 | Phlda3        |
| ENSMUSG00000022453 | 0.00617533 | 1.532269626 | Naga          |
| ENSMUSG00000041028 | 0.00514272 | 1.531734004 | Ghitm         |
| ENSMUSG00000000202 | 0.02102618 | 1.52920971  | Btbd17        |
| ENSMUSG00000021676 | 0.03305518 | 1.527165178 | Iqgap2        |
| ENSMUSG00000073725 | 0.01382109 | 1.527101491 | Lmbrd1        |
| ENSMUSG00000029469 | 0.01249461 | 1.526528538 | Ift81         |
| ENSMUSG00000028273 | 0.03343263 | 1.526389554 | Pdlim5        |
| ENSMUSG00000022175 | 0.00426595 | 1.526305988 | Lrp10         |
| ENSMUSG00000028494 | 0.01619934 | 1.525592881 | Plin2         |
| ENSMUSG00000019039 | 0.02167174 | 1.525546912 | Dalrd3        |
| ENSMUSG00000028480 | 0.00657936 | 1.52522473  | Glipr2        |
| ENSMUSG00000018548 | 0.0387476  | 1.524295082 | Trim37        |
| ENSMUSG00000059824 | 0.04465944 | 1.524082175 | Dbp           |
| ENSMUSG00000004207 | 0.01112402 | 1.522371538 | Psap          |
| ENSMUSG00000041544 | 0.02283965 | 1.522290367 | Ptchd2        |
| ENSMUSG00000057329 | 0.0099652  | 1.521166386 | Bcl2          |
| ENSMUSG00000024558 | 0.02022429 | 1.520216984 | Mapk4         |
| ENSMUSG00000028923 | 0.00676738 | 1.51814147  | Necap2        |
| ENSMUSG00000034707 | 0.02298575 | 1.518096422 | Gns           |
| ENSMUSG00000026104 | 0.0293788  | 1.51766491  | Stat1         |
| ENSMUSG00000038286 | 0.03509283 | 1.5161575   | Bphi          |
| ENSMUSG00000026932 | 0.0036604  | 1.512272592 | Nacc2         |
| ENSMUSG00000024143 | 0.0387476  | 1.51211658  | Rhoq          |
| ENSMUSG00000017144 | 0.0160706  | 1.511588302 | Rnd3          |
| ENSMUSG00000090386 | 0.03935635 | 1.511525354 | Mir99ahg      |
| ENSMUSG00000038650 | 0.01393294 | 1.511471623 | Rnh1          |
| ENSMUSG00000027452 | 0.01887502 | 1.511015221 | Acss1         |
| ENSMUSG00000062753 | 0.04519257 | 1.510216411 | AI413582      |
| ENSMUSG00000025475 | 0.0205984  | 1.509445048 | Adgra1        |
| ENSMUSG00000033355 | 0.02196142 | 1.508746557 | Rtp4          |
| ENSMUSG00000055003 | 0.03761758 | 1.508164582 | Lrtm2         |
| ENSMUSG00000047786 | 0.0317916  | 1.507847898 | Lix1          |
| ENSMUSG00000044768 | 0.01325837 | 1.506666182 | D1Ertd622e    |
| ENSMUSG00000026578 | 0.01223708 | 1.505742473 | Ccdc181       |
| ENSMUSG00000030246 | 0.0028921  | 1.504363591 | Ldhd          |
| ENSMUSG00000062312 | 0.03231324 | 1.503692807 | Erbp2         |
| ENSMUSG00000024535 | 0.02268816 | 1.502872847 | Snx24         |
| ENSMUSG00000039952 | 0.04338261 | 1.502696241 | Dag1          |
| ENSMUSG00000029070 | 0.01094364 | 1.502569217 | Mxra8         |
| ENSMUSG00000030339 | 0.00984099 | 1.502204625 | Ltbr          |
| ENSMUSG00000037287 | 0.0277014  | 1.501018747 | Tbcel         |
| ENSMUSG00000030495 | 0.03375032 | 1.500973604 | Slc7a10       |
| ENSMUSG00000045257 | 0.04419991 | 1.500810559 | Morn2         |
| ENSMUSG00000033174 | 0.02256888 | 1.500611145 | Mgll          |
| ENSMUSG00000074166 | 0.0476406  | 1.500364594 | AW146154      |
| ENSMUSG00000026958 | 0.01597992 | 1.500191915 | Dpp7          |
| ENSMUSG00000043964 | 0.02963886 | 1.499656301 | Orai3         |
| ENSMUSG00000052688 | 0.04529276 | 1.499142274 | Rab7b         |
| ENSMUSG00000040010 | 0.00474072 | 1.498248189 | Slc7a5        |
| ENSMUSG00000032515 | 0.04670723 | 1.497435463 | Csrnp1        |
| ENSMUSG00000050530 | 0.02258808 | 1.496127557 | Fam171a1      |
| ENSMUSG00000021792 | 0.00577439 | 1.495395466 | Fam213a       |
| ENSMUSG00000032320 | 0.00250504 | 1.494545553 | Rcn2          |
| ENSMUSG00000025810 | 0.03967527 | 1.493411957 | Nrp1          |
| ENSMUSG00000053398 | 0.00339108 | 1.492225316 | Phgdh         |
| ENSMUSG00000003420 | 0.03276344 | 1.491957155 | Fcgrt         |
| ENSMUSG00000024993 | 0.02883424 | 1.491889841 | Fam45a        |
| ENSMUSG00000026051 | 0.04608838 | 1.491473329 | 1500015O10Rik |
| ENSMUSG00000071637 | 0.02442841 | 1.489551981 | Cebpd         |
| ENSMUSG00000031347 | 0.01503955 | 1.489296517 | Cetn2         |
| ENSMUSG00000027668 | 0.01984664 | 1.488314946 | Mfn1          |
| ENSMUSG00000055401 | 0.03993353 | 1.487030596 | Fbxo6         |



|                    |            |             |               |
|--------------------|------------|-------------|---------------|
| ENSMUSG00000073889 | 0.03909941 | 1.486994855 | Il11ra1       |
| ENSMUSG00000009291 | 0.00448939 | 1.486693619 | Pttg1ip       |
| ENSMUSG00000025911 | 0.00866271 | 1.486478011 | Adhfe1        |
| ENSMUSG00000028988 | 0.02963907 | 1.48637331  | Ctnnbip1      |
| ENSMUSG00000027230 | 0.04420675 | 1.48468513  | Creb3l1       |
| ENSMUSG00000025647 | 0.01820394 | 1.48379715  | Shisa5        |
| ENSMUSG00000035673 | 0.02945507 | 1.483052707 | Sbno2         |
| ENSMUSG00000026817 | 0.01044467 | 1.481718793 | Ak1           |
| ENSMUSG00000035356 | 0.03893729 | 1.480873461 | Nfkbiz        |
| ENSMUSG00000022756 | 0.04420675 | 1.480362147 | Slc7a4        |
| ENSMUSG00000036775 | 0.02234368 | 1.480200021 | Decr2         |
| ENSMUSG00000079418 | 0.04534381 | 1.479911363 | Atg4a         |
| ENSMUSG00000031755 | 0.04533348 | 1.478715764 | Bbs2          |
| ENSMUSG00000078670 | 0.02151903 | 1.478219074 | Fam174b       |
| ENSMUSG00000031565 | 0.00930991 | 1.477768647 | Fgfr1         |
| ENSMUSG0000001039  | 0.0329931  | 1.476206908 | B9d1          |
| ENSMUSG00000018340 | 0.00466864 | 1.47382499  | Anxa6         |
| ENSMUSG00000032231 | 0.00835533 | 1.472990011 | Anxa2         |
| ENSMUSG00000024538 | 0.01419251 | 1.471861239 | Ppic          |
| ENSMUSG00000021477 | 0.00502352 | 1.471460417 | Ctsl          |
| ENSMUSG00000028542 | 0.01588441 | 1.47114302  | Slc6a9        |
| ENSMUSG00000009772 | 0.04716066 | 1.470325358 | Nuak2         |
| ENSMUSG00000085793 | 0.04362411 | 1.469921259 | Lin52         |
| ENSMUSG00000040811 | 0.024525   | 1.469430133 | Eml2          |
| ENSMUSG00000001750 | 0.02781703 | 1.468997488 | Tcirg1        |
| ENSMUSG00000048915 | 0.02823485 | 1.468787725 | Efna5         |
| ENSMUSG00000062590 | 0.02873135 | 1.467931614 | Armc9         |
| ENSMUSG00000034926 | 0.03305518 | 1.467447011 | Dhcr24        |
| ENSMUSG00000034201 | 0.0122667  | 1.467339837 | Gas2l1        |
| ENSMUSG00000024187 | 0.00599045 | 1.466787698 | Fam234a       |
| ENSMUSG00000021900 | 0.01757191 | 1.466417764 | Btd           |
| ENSMUSG00000023921 | 0.02599926 | 1.465543434 | Mut           |
| ENSMUSG00000039908 | 0.04249995 | 1.465203074 | Slc26a11      |
| ENSMUSG00000017670 | 0.02045264 | 1.46385143  | Elmo2         |
| ENSMUSG00000028249 | 0.01429242 | 1.463230626 | Sdcbp         |
| ENSMUSG00000036503 | 0.00929746 | 1.463066261 | Rnf13         |
| ENSMUSG00000030555 | 0.02978757 | 1.462927617 | Ttc23         |
| ENSMUSG00000031785 | 0.00776572 | 1.462823663 | Adgrg1        |
| ENSMUSG00000021112 | 0.03122063 | 1.462818673 | Mpp5          |
| ENSMUSG00000008035 | 0.00677734 | 1.461808712 | Mid1ip1       |
| ENSMUSG00000031604 | 0.00345831 | 1.460419006 | Msmo1         |
| ENSMUSG00000026207 | 0.03576511 | 1.460334279 | Speg          |
| ENSMUSG00000026988 | 0.0462589  | 1.45842385  | Wdsub1        |
| ENSMUSG00000015843 | 0.04331518 | 1.457309636 | Rxrg          |
| ENSMUSG00000027122 | 0.04136016 | 1.456815043 | Arl14ep       |
| ENSMUSG00000029470 | 0.02094303 | 1.456602829 | P2rx4         |
| ENSMUSG00000025792 | 0.03196892 | 1.456590847 | Slc25a10      |
| ENSMUSG00000044252 | 0.03074773 | 1.456162802 | Osbpl1a       |
| ENSMUSG00000030739 | 0.02868497 | 1.456134781 | Myh14         |
| ENSMUSG00000032715 | 0.04924565 | 1.456060082 | Trib3         |
| ENSMUSG00000022108 | 0.00180348 | 1.455973454 | Itm2b         |
| ENSMUSG00000032018 | 0.01699732 | 1.4547942   | Sc5d          |
| ENSMUSG00000019823 | 0.04491319 | 1.454653884 | Mical1        |
| ENSMUSG00000031584 | 0.01603883 | 1.4517222   | Gsr           |
| ENSMUSG00000079235 | 0.04121643 | 1.451224469 | Ccdc13        |
| ENSMUSG00000030103 | 0.00713695 | 1.450843617 | Bhlhe40       |
| ENSMUSG00000026356 | 0.01096649 | 1.450589249 | Dars          |
| ENSMUSG00000019856 | 0.03893729 | 1.449703473 | Fam184a       |
| ENSMUSG00000025232 | 0.00643711 | 1.448741909 | Hexa          |
| ENSMUSG00000031819 | 0.00677734 | 1.448392066 | Emc8          |
| ENSMUSG00000038178 | 0.02309759 | 1.448367328 | Slc43a2       |
| ENSMUSG00000028223 | 0.01312108 | 1.447121529 | Decr1         |
| ENSMUSG00000014232 | 0.0387476  | 1.446811512 | Cluap1        |
| ENSMUSG00000024431 | 0.03095279 | 1.444949036 | Nr3c1         |
| ENSMUSG00000032314 | 0.01429242 | 1.444550346 | Etfa          |
| ENSMUSG00000045558 | 0.00192927 | 1.444525798 | Ndrp2         |
| ENSMUSG00000029752 | 0.00899775 | 1.444346941 | Asns          |
| ENSMUSG00000046182 | 0.04419991 | 1.444232923 | Gsg1l         |
| ENSMUSG00000033965 | 0.01411245 | 1.44384026  | Slc16a2       |
| ENSMUSG00000020284 | 0.03653674 | 1.442145197 | 1810043G02Rik |
| ENSMUSG00000019874 | 0.0178136  | 1.441613471 | Fabp7         |
| ENSMUSG00000022793 | 0.0150035  | 1.441541521 | B4galnt4      |
| ENSMUSG00000010025 | 0.04420675 | 1.440209163 | Aldh3a2       |
| ENSMUSG00000039047 | 0.0151336  | 1.439370389 | Pigk          |
| ENSMUSG00000022132 | 0.02859135 | 1.437825706 | Cldn10        |

|                    |            |             |          |
|--------------------|------------|-------------|----------|
| ENSMUSG00000028657 | 0.01780071 | 1.436551771 | Ppt1     |
| ENSMUSG00000059248 | 0.01336951 | 1.436097823 | 42987    |
| ENSMUSG00000017760 | 0.00573187 | 1.436053427 | Ctsa     |
| ENSMUSG00000022253 | 0.02147976 | 1.435920064 | Nadk2    |
| ENSMUSG00000075415 | 0.01820052 | 1.435911151 | Fnbp1    |
| ENSMUSG00000024534 | 0.03952269 | 1.435281241 | Sncaip   |
| ENSMUSG00000028962 | 0.0473114  | 1.434570503 | Slc4a2   |
| ENSMUSG00000022476 | 0.02615581 | 1.434555544 | Polr3h   |
| ENSMUSG00000025245 | 0.03022858 | 1.434414377 | Lztf11   |
| ENSMUSG00000037706 | 0.00941464 | 1.433670824 | Cd81     |
| ENSMUSG00000021483 | 0.02775895 | 1.43351039  | Cdk20    |
| ENSMUSG00000024909 | 0.02258808 | 1.433372833 | Efemp2   |
| ENSMUSG00000041915 | 0.01611275 | 1.432935369 | Ammecr11 |
| ENSMUSG00000046949 | 0.0370051  | 1.432764497 | Nqo2     |
| ENSMUSG00000036555 | 0.03185226 | 1.432652606 | lqce     |
| ENSMUSG00000002325 | 0.01759069 | 1.43217286  | Irf9     |
| ENSMUSG00000022210 | 0.03870685 | 1.431929106 | Dhrs4    |
| ENSMUSG00000010755 | 0.00871879 | 1.431595961 | Cars     |
| ENSMUSG00000040289 | 0.01233657 | 1.431114506 | Hey1     |
| ENSMUSG00000004040 | 0.02363373 | 1.43064975  | Stat3    |
| ENSMUSG00000026509 | 0.01847436 | 1.429409254 | Capn2    |
| ENSMUSG00000025823 | 0.00910234 | 1.429241795 | Pdia4    |
| ENSMUSG00000040151 | 0.03870685 | 1.428282409 | Hs2st1   |
| ENSMUSG00000096753 | 0.04577328 | 1.427782035 | Fam181a  |
| ENSMUSG00000010064 | 0.00703788 | 1.427427377 | Slc38a3  |
| ENSMUSG00000036880 | 0.01070579 | 1.427335733 | Acaa2    |
| ENSMUSG00000065954 | 0.02068171 | 1.42723077  | Tacc1    |
| ENSMUSG00000031428 | 0.00637137 | 1.426980537 | Zcchc18  |
| ENSMUSG00000031156 | 0.02781703 | 1.42598698  | Slc35a2  |
| ENSMUSG00000053644 | 0.01489461 | 1.425630518 | Aldh7a1  |
| ENSMUSG00000030310 | 0.04559083 | 1.423947921 | Slc6a1   |
| ENSMUSG00000020644 | 0.01340719 | 1.422586699 | Id2      |
| ENSMUSG00000059325 | 0.04915041 | 1.421901    | Hopx     |
| ENSMUSG00000016256 | 0.02258808 | 1.421731227 | Ctsz     |
| ENSMUSG00000028063 | 0.02775417 | 1.421001164 | Lmna     |
| ENSMUSG00000029175 | 0.01854227 | 1.420564108 | Slc35f6  |
| ENSMUSG00000070498 | 0.03501936 | 1.419807524 | Tmem132b |
| ENSMUSG00000034908 | 0.01367885 | 1.419486994 | Sidt2    |
| ENSMUSG00000029446 | 0.01631379 | 1.419184247 | Psph     |
| ENSMUSG00000027559 | 0.03221732 | 1.418197981 | Car3     |
| ENSMUSG00000015889 | 0.01157827 | 1.417568434 | Lta4h    |
| ENSMUSG00000032349 | 0.0470436  | 1.417296429 | Elovl5   |
| ENSMUSG00000027168 | 0.04362411 | 1.417077988 | Pax6     |
| ENSMUSG00000021615 | 0.03060077 | 1.416897191 | Xrcc4    |
| ENSMUSG00000023259 | 0.03838607 | 1.416316156 | Slc26a6  |
| ENSMUSG00000062908 | 0.02256811 | 1.415686339 | Acadm    |
| ENSMUSG00000028048 | 0.01523335 | 1.414978886 | Gba      |
| ENSMUSG00000030352 | 0.04768148 | 1.414010681 | Tspan9   |
| ENSMUSG00000068923 | 0.00265725 | 1.413825795 | Syt11    |
| ENSMUSG00000026576 | 0.01188729 | 1.413667212 | Atp1b1   |
| ENSMUSG00000024359 | 0.03938439 | 1.413508486 | Hspa9    |
| ENSMUSG00000021939 | 0.00319626 | 1.412947022 | Ctsb     |
| ENSMUSG00000026203 | 0.01302585 | 1.412903871 | Dnajb2   |
| ENSMUSG00000008348 | 0.00899775 | 1.411865636 | Ubc      |
| ENSMUSG00000037257 | 0.01427324 | 1.410193578 | Aagab    |
| ENSMUSG00000027984 | 0.0087902  | 1.409830483 | Hadh     |
| ENSMUSG00000020111 | 0.01206687 | 1.409372933 | Micu1    |
| ENSMUSG00000029455 | 0.01747473 | 1.408116963 | Aldh2    |
| ENSMUSG00000027207 | 0.03185226 | 1.407998619 | Galk2    |
| ENSMUSG00000022091 | 0.01294192 | 1.407374825 | Sorbs3   |
| ENSMUSG00000058056 | 0.02160012 | 1.406205203 | Palld    |
| ENSMUSG00000028256 | 0.04722538 | 1.406138072 | Odf2l    |
| ENSMUSG00000032965 | 0.01611275 | 1.405917693 | Ift57    |
| ENSMUSG00000056698 | 0.02149767 | 1.405857485 | Elmod3   |
| ENSMUSG00000027303 | 0.04202162 | 1.405157057 | Ptptra   |
| ENSMUSG00000087408 | 0.03128166 | 1.404673015 | Cers1    |
| ENSMUSG00000068742 | 0.03178861 | 1.40343894  | Cry2     |
| ENSMUSG00000026773 | 0.03214983 | 1.402471138 | Pfkfb3   |
| ENSMUSG00000042616 | 0.04040399 | 1.402257428 | Oscp1    |
| ENSMUSG00000029209 | 0.02945507 | 1.402194676 | Gnpda2   |
| ENSMUSG00000039887 | 0.0149748  | 1.401749541 | Alg14    |
| ENSMUSG00000022899 | 0.01763386 | 1.401709841 | Slc15a2  |
| ENSMUSG00000027257 | 0.01738532 | 1.400833308 | Pacsin3  |
| ENSMUSG00000024039 | 0.02242552 | 1.400493739 | Cbs      |
| ENSMUSG00000030341 | 0.02151903 | 1.398041202 | Tnfrsf1a |

|                    |            |             |               |
|--------------------|------------|-------------|---------------|
| ENSMUSG00000017765 | 0.0298118  | 1.398023279 | Slc12a4       |
| ENSMUSG00000042210 | 0.04289028 | 1.395511972 | Abhd14a       |
| ENSMUSG00000027378 | 0.04452246 | 1.394539895 | Nphp1         |
| ENSMUSG00000031232 | 0.02998029 | 1.394276566 | Magt1         |
| ENSMUSG00000035596 | 0.015946   | 1.39419913  | Mboat7        |
| ENSMUSG00000006205 | 0.04693781 | 1.393012966 | Htra1         |
| ENSMUSG00000022489 | 0.03085399 | 1.391857908 | Pde1b         |
| ENSMUSG00000019295 | 0.0229382  | 1.391470283 | Tmem129       |
| ENSMUSG00000020611 | 0.03140834 | 1.390084034 | Gna13         |
| ENSMUSG00000054226 | 0.04202162 | 1.389471942 | Tprkb         |
| ENSMUSG00000032181 | 0.00790958 | 1.389243943 | Scg3          |
| ENSMUSG00000028878 | 0.02722592 | 1.388772735 | Fam176a       |
| ENSMUSG00000008398 | 0.04807108 | 1.388209789 | Elk3          |
| ENSMUSG00000081534 | 0.02691782 | 1.388157619 | Slc48a1       |
| ENSMUSG00000023092 | 0.04437303 | 1.388077506 | Fhl1          |
| ENSMUSG00000021759 | 0.03499242 | 1.385679892 | Plpp1         |
| ENSMUSG00000043496 | 0.02683046 | 1.382839078 | Tril          |
| ENSMUSG00000040813 | 0.03685827 | 1.382348434 | Tex264        |
| ENSMUSG00000054477 | 0.04000427 | 1.381665068 | Kcnn2         |
| ENSMUSG00000026796 | 0.04223821 | 1.379717476 | Fam129b       |
| ENSMUSG00000002341 | 0.00466864 | 1.378620711 | Ncan          |
| ENSMUSG00000047090 | 0.03202547 | 1.378224899 | Tmem198b      |
| ENSMUSG00000026342 | 0.04483784 | 1.37721824  | Slc35f5       |
| ENSMUSG00000033629 | 0.03326716 | 1.376623133 | Hacd3         |
| ENSMUSG00000021916 | 0.03517641 | 1.376168541 | Glit8d1       |
| ENSMUSG00000025579 | 0.01653246 | 1.376001469 | Gaa           |
| ENSMUSG00000037031 | 0.01920318 | 1.372738478 | Tspan15       |
| ENSMUSG00000075590 | 0.02862111 | 1.371781777 | Nrbp2         |
| ENSMUSG00000031342 | 0.00262934 | 1.371677821 | Gpm6b         |
| ENSMUSG00000037747 | 0.01013024 | 1.371288466 | Phyhipl       |
| ENSMUSG00000022898 | 0.01851799 | 1.371226174 | Dscr3         |
| ENSMUSG00000024026 | 0.01279521 | 1.370228243 | Glo1          |
| ENSMUSG00000031451 | 0.03656242 | 1.368866943 | Gas6          |
| ENSMUSG00000003644 | 0.03826061 | 1.368722233 | Rps6ka1       |
| ENSMUSG00000031431 | 0.02181554 | 1.367994404 | Tsc22d3       |
| ENSMUSG00000015837 | 0.00606196 | 1.365798962 | Sqstm1        |
| ENSMUSG00000028673 | 0.04519257 | 1.364397078 | Fuca1         |
| ENSMUSG00000031983 | 0.0147692  | 1.363007089 | 2310022B05Rik |
| ENSMUSG00000005089 | 0.02647591 | 1.362159693 | Slc1a2        |
| ENSMUSG00000029575 | 0.04940982 | 1.361873225 | Mmab          |
| ENSMUSG00000027332 | 0.03484226 | 1.36184408  | Ivd           |
| ENSMUSG00000029106 | 0.0304333  | 1.35759509  | Add1          |
| ENSMUSG00000003534 | 0.01133891 | 1.357024907 | Ddr1          |
| ENSMUSG00000061461 | 0.04568435 | 1.356843383 | Smim20        |
| ENSMUSG00000035790 | 0.03390894 | 1.356407827 | Cep19         |
| ENSMUSG00000031532 | 0.00745629 | 1.35594148  | Saraf         |
| ENSMUSG00000030780 | 0.04187566 | 1.355856859 | BC017158      |
| ENSMUSG00000026687 | 0.02442841 | 1.355634903 | Aldh9a1       |
| ENSMUSG00000025495 | 0.02524514 | 1.354096345 | Ptdss2        |
| ENSMUSG00000020585 | 0.01495928 | 1.353990834 | Laptm4a       |
| ENSMUSG00000034105 | 0.04136016 | 1.353899199 | Tldc1         |
| ENSMUSG00000027187 | 0.04012413 | 1.353845498 | Cat           |
| ENSMUSG00000025421 | 0.01819982 | 1.353813726 | Hdhd2         |
| ENSMUSG00000026259 | 0.04249995 | 1.349558505 | Ngef          |
| ENSMUSG00000018574 | 0.02670786 | 1.348396356 | Acadvl        |
| ENSMUSG00000040472 | 0.02980388 | 1.345216797 | Rabggtta      |
| ENSMUSG00000059447 | 0.03961972 | 1.344636473 | Hadhb         |
| ENSMUSG00000026853 | 0.04229755 | 1.344624852 | Crat          |
| ENSMUSG00000025512 | 0.03159589 | 1.344020823 | Chid1         |
| ENSMUSG00000004270 | 0.01887271 | 1.343414713 | Lpcat3        |
| ENSMUSG00000070509 | 0.04905551 | 1.343251208 | Rgma          |
| ENSMUSG00000031392 | 0.03197787 | 1.342940433 | Irak1         |
| ENSMUSG00000004892 | 0.00516937 | 1.342929714 | Bcan          |
| ENSMUSG00000037049 | 0.01856067 | 1.341224845 | Smpd1         |
| ENSMUSG00000037573 | 0.03012675 | 1.341162216 | Tob1          |
| ENSMUSG00000049532 | 0.02615581 | 1.340960633 | Sall2         |
| ENSMUSG00000022842 | 0.03870685 | 1.340914089 | Ece2          |
| ENSMUSG00000022537 | 0.02741469 | 1.339925184 | Tmem44        |
| ENSMUSG00000034210 | 0.03404733 | 1.338155009 | Efcab14       |
| ENSMUSG00000058254 | 0.00564044 | 1.33720866  | Tspan7        |
| ENSMUSG00000023010 | 0.01562252 | 1.336486456 | Tmbim6        |
| ENSMUSG00000020003 | 0.03961972 | 1.335158187 | Pex7          |
| ENSMUSG00000005667 | 0.03304611 | 1.334920442 | Mthfd2        |
| ENSMUSG00000037712 | 0.03332875 | 1.332357685 | Fermt2        |
| ENSMUSG00000023452 | 0.02393816 | 1.331975564 | Pisd          |

|                     |            |              |           |
|---------------------|------------|--------------|-----------|
| ENSMUSG00000026421  | 0.03891515 | 1.331850098  | Csrp1     |
| ENSMUSG00000027286  | 0.03968727 | 1.331387488  | Lrrc57    |
| ENSMUSG00000048807  | 0.04687309 | 1.32923183   | Slc35e4   |
| ENSMUSG00000031960  | 0.04936709 | 1.327299118  | Aars      |
| ENSMUSG00000040354  | 0.02560412 | 1.323362867  | Mars      |
| ENSMUSG00000024190  | 0.02409    | 1.321806741  | Dusp1     |
| ENSMUSG00000040374  | 0.03893729 | 1.321141385  | Pex2      |
| ENSMUSG00000020423  | 0.01366274 | 1.320791185  | Btg2      |
| ENSMUSG00000024640  | 0.01631696 | 1.318861365  | Psat1     |
| ENSMUSG00000032641  | 0.03846909 | 1.318732377  | Gpr19     |
| ENSMUSG00000017615  | 0.02251402 | 1.317095185  | Tnfaip1   |
| ENSMUSG00000046598  | 0.03518642 | 1.314061581  | Bdh1      |
| ENSMUSG00000029578  | 0.03525234 | 1.313427556  | Wipi2     |
| ENSMUSG00000026615  | 0.04329933 | 1.31239041   | Eprs      |
| ENSMUSG00000027423  | 0.03179303 | 1.312006995  | Snx5      |
| ENSMUSG00000040435  | 0.04237275 | 1.31129841   | Ppp1r15a  |
| ENSMUSG00000038967  | 0.04273894 | 1.310562653  | Pdk2      |
| ENSMUSG00000029838  | 0.01742638 | 1.30782532   | Ptn       |
| ENSMUSG00000056515  | 0.0383358  | 1.304604549  | Rab31     |
| ENSMUSG00000007458  | 0.03820727 | 1.304344175  | M6pr      |
| ENSMUSG00000016946  | 0.01932667 | 1.303697995  | Kctd5     |
| ENSMUSG00000021417  | 0.04466684 | 1.299057811  | Eci2      |
| ENSMUSG00000022708  | 0.02971659 | 1.298914388  | Zbtb20    |
| ENSMUSG00000036752  | 0.02945753 | 1.297434029  | Tubb4b    |
| ENSMUSG00000032324  | 0.02264697 | 1.296706858  | Tspan3    |
| ENSMUSG00000003363  | 0.03513546 | 1.295814221  | Pld3      |
| ENSMUSG00000004936  | 0.03576511 | 1.294955467  | Map2k1    |
| ENSMUSG00000022186  | 0.02890272 | 1.289782134  | Oxct1     |
| ENSMUSG00000022365  | 0.03122063 | 1.287030827  | Der1      |
| ENSMUSG00000025791  | 0.04289028 | 1.285568081  | Pgm2      |
| ENSMUSG00000026879  | 0.04237637 | 1.284576443  | Gsn       |
| ENSMUSG00000021794  | 0.04038541 | 1.282989522  | Glud1     |
| ENSMUSG00000006800  | 0.04936709 | 1.278608923  | Sulf2     |
| ENSMUSG00000033917  | 0.04338261 | 1.277811272  | Gde1      |
| ENSMUSG00000038936  | 0.03679177 | 1.277758929  | Sccpdh    |
| ENSMUSG00000027570  | 0.04289028 | 1.277190357  | Col9a3    |
| ENSMUSG00000000078  | 0.04374533 | 1.27646869   | Klf6      |
| ENSMUSG000000061981 | 0.03931097 | 1.275694948  | Flot2     |
| ENSMUSG00000050043  | 0.03600915 | 1.274613188  | Tmx2      |
| ENSMUSG00000033065  | 0.03938439 | 1.273520659  | Pfkm      |
| ENSMUSG00000041958  | 0.03060077 | 1.273417544  | Pigs      |
| ENSMUSG00000028603  | 0.04326056 | 1.268196444  | Scp2      |
| ENSMUSG00000021250  | 0.01545851 | 1.263298035  | Fos       |
| ENSMUSG00000018042  | 0.03580281 | 1.262414324  | Cyb5r3    |
| ENSMUSG00000021282  | 0.03580281 | 1.260893792  | Eif5      |
| ENSMUSG00000031667  | 0.03870685 | 1.253647285  | Aktip     |
| ENSMUSG00000024654  | 0.03480872 | 1.242624666  | Asrgl1    |
| ENSMUSG00000025268  | 0.04794295 | 1.228927916  | Maged2    |
| ENSMUSG00000028194  | 0.04975518 | 1.221887521  | Ddah1     |
| ENSMUSG00000030654  | 0.045317   | 1.21602284   | Arl6ip1   |
| ENSMUSG00000071172  | 0.04936709 | -1.218969569 | Srsf3     |
| ENSMUSG00000034403  | 0.04743297 | -1.234641194 | Pja1      |
| ENSMUSG00000034675  | 0.03202547 | -1.251050629 | Dbn1      |
| ENSMUSG00000020894  | 0.03922843 | -1.255139044 | Vamp2     |
| ENSMUSG0000001525   | 0.03820727 | -1.255207803 | Tubb5     |
| ENSMUSG00000057113  | 0.04471543 | -1.262516078 | Npm1      |
| ENSMUSG00000041911  | 0.03294953 | -1.267345476 | Dlx1      |
| ENSMUSG00000038482  | 0.04375782 | -1.271870863 | Tfdp1     |
| ENSMUSG00000052727  | 0.02051058 | -1.272890558 | Map1b     |
| ENSMUSG00000032399  | 0.0388249  | -1.274550612 | Rpl4      |
| ENSMUSG00000058886  | 0.04787489 | -1.276854481 | Deaf1     |
| ENSMUSG00000021288  | 0.04883723 | -1.27686187  | Klc1      |
| ENSMUSG0000001034   | 0.04988529 | -1.285943228 | Mapk7     |
| ENSMUSG00000064351  | 0.01819837 | -1.2860973   | mt-Co1    |
| ENSMUSG00000024772  | 0.03935756 | -1.287135703 | Ehd1      |
| ENSMUSG00000039194  | 0.04289028 | -1.28965514  | Rlbp1     |
| ENSMUSG00000063511  | 0.03540411 | -1.291027585 | Snrnp70   |
| ENSMUSG00000025575  | 0.04509472 | -1.291893115 | Cant1     |
| ENSMUSG00000029126  | 0.03080815 | -1.292876924 | Nsg1      |
| ENSMUSG00000038628  | 0.0462589  | -1.294057205 | Polr3k    |
| ENSMUSG00000053477  | 0.01439482 | -1.299345618 | Tcf4      |
| ENSMUSG00000004980  | 0.0129979  | -1.299366004 | Hnrnpa2b1 |
| ENSMUSG0000001016   | 0.02380285 | -1.303984821 | Ilf2      |
| ENSMUSG00000041740  | 0.04230269 | -1.307803316 | Rnf10     |
| ENSMUSG00000026434  | 0.04485975 | -1.309181547 | Nucks1    |

|                    |            |              |               |
|--------------------|------------|--------------|---------------|
| ENSMUSG00000034165 | 0.04038958 | -1.316217041 | Ccnd3         |
| ENSMUSG00000039218 | 0.03425628 | -1.316486972 | Srrm2         |
| ENSMUSG00000057406 | 0.03156284 | -1.317112458 | Whsc1         |
| ENSMUSG00000037750 | 0.04247916 | -1.318907869 | Fam222b       |
| ENSMUSG00000064367 | 0.03771402 | -1.319137833 | mt-Nd5        |
| ENSMUSG0000006398  | 0.03714371 | -1.321795121 | Cdc20         |
| ENSMUSG00000006728 | 0.04883723 | -1.324132814 | Cdk4          |
| ENSMUSG00000034377 | 0.04037579 | -1.324262439 | Tulp4         |
| ENSMUSG00000043940 | 0.02624196 | -1.327509581 | Wdfy3         |
| ENSMUSG00000022557 | 0.03989423 | -1.328065153 | Bop1          |
| ENSMUSG00000026764 | 0.03375032 | -1.329485288 | Kif5c         |
| ENSMUSG00000028926 | 0.04162416 | -1.329918265 | Cdk14         |
| ENSMUSG00000046157 | 0.03818488 | -1.331381915 | Tmem229b      |
| ENSMUSG00000023988 | 0.04180892 | -1.332031441 | Bysl          |
| ENSMUSG00000022619 | 0.02945507 | -1.335133485 | Mapk8ip2      |
| ENSMUSG00000031955 | 0.02560412 | -1.335768917 | Bcar1         |
| ENSMUSG00000019927 | 0.03299795 | -1.336413368 | Ube2d1        |
| ENSMUSG00000041084 | 0.0319152  | -1.336493864 | Ostc          |
| ENSMUSG00000037742 | 0.0174796  | -1.33696497  | Eef1a1        |
| ENSMUSG00000026797 | 0.04429453 | -1.338462825 | Stxbp1        |
| ENSMUSG00000033106 | 0.04875168 | -1.339022774 | Slc7a6os      |
| ENSMUSG00000040896 | 0.0430665  | -1.339104498 | Kcnd3         |
| ENSMUSG00000042078 | 0.0497418  | -1.339796995 | Svop          |
| ENSMUSG00000030374 | 0.01153821 | -1.340615633 | Strn4         |
| ENSMUSG00000074698 | 0.04551465 | -1.341315074 | Csnk2a1       |
| ENSMUSG0000001062  | 0.04961646 | -1.341658357 | Vps9d1        |
| ENSMUSG00000061689 | 0.02810537 | -1.342982814 | Dlgap4        |
| ENSMUSG00000032872 | 0.04644014 | -1.343156881 | Cyb5r4        |
| ENSMUSG00000045411 | 0.02740917 | -1.343447354 | 2410002F23Rik |
| ENSMUSG00000026890 | 0.03484597 | -1.343621824 | Lhx6          |
| ENSMUSG00000020297 | 0.01847436 | -1.345873918 | Nsg2          |
| ENSMUSG00000031730 | 0.04194091 | -1.346494885 | Dhodh         |
| ENSMUSG00000030096 | 0.02964449 | -1.346881696 | Slc6a6        |
| ENSMUSG00000009418 | 0.03711628 | -1.348427136 | Nav1          |
| ENSMUSG00000061666 | 0.02980274 | -1.349786299 | Gdpd1         |
| ENSMUSG00000042354 | 0.04308044 | -1.349791962 | Gnl3          |
| ENSMUSG00000044528 | 0.03704656 | -1.35008013  | Tram111       |
| ENSMUSG00000079036 | 0.04202028 | -1.353712464 | Alkbh1        |
| ENSMUSG00000028833 | 0.0296512  | -1.354292649 | Ncdn          |
| ENSMUSG0000003808  | 0.03156284 | -1.354595397 | Farsa         |
| ENSMUSG00000078851 | 0.04799372 | -1.356762581 | Hist3h2a      |
| ENSMUSG00000025237 | 0.02504188 | -1.357032593 | Parp6         |
| ENSMUSG00000039361 | 0.03501936 | -1.358863309 | Picalm        |
| ENSMUSG00000033326 | 0.04519257 | -1.359351605 | Kdm4a         |
| ENSMUSG00000028826 | 0.0366907  | -1.359775193 | Tmem57        |
| ENSMUSG00000050132 | 0.04743766 | -1.364554787 | Sarm1         |
| ENSMUSG00000024245 | 0.03966218 | -1.365313529 | Tmem178       |
| ENSMUSG00000007850 | 0.02022429 | -1.365906856 | Hnrnp1        |
| ENSMUSG00000029755 | 0.03968727 | -1.369732584 | Dlx5          |
| ENSMUSG00000040722 | 0.00987111 | -1.371004039 | Scamp5        |
| ENSMUSG00000102252 | 0.04489097 | -1.373110186 | Snrpn         |
| ENSMUSG00000066705 | 0.02958307 | -1.373995112 | Fxyd6         |
| ENSMUSG00000020086 | 0.02423189 | -1.376491731 | H2afy2        |
| ENSMUSG00000056296 | 0.04561971 | -1.377346006 | Synpr         |
| ENSMUSG00000026424 | 0.01223708 | -1.380172185 | Gpr3711       |
| ENSMUSG00000024785 | 0.03562839 | -1.382995382 | Rcl1          |
| ENSMUSG00000068735 | 0.01382792 | -1.384027777 | Trp53i11      |
| ENSMUSG00000026563 | 0.04300274 | -1.384795171 | Tada1         |
| ENSMUSG00000017943 | 0.03181224 | -1.38493303  | Gdap111       |
| ENSMUSG00000067336 | 0.04608838 | -1.38588213  | Bmpr2         |
| ENSMUSG00000020524 | 0.03820727 | -1.386251574 | Gria1         |
| ENSMUSG00000020740 | 0.0472345  | -1.386286974 | Gga3          |
| ENSMUSG00000014773 | 0.04251673 | -1.386806951 | Dll1          |
| ENSMUSG00000028488 | 0.04374477 | -1.387248228 | Sh3gl2        |
| ENSMUSG00000034994 | 0.01797239 | -1.388244737 | Eef2          |
| ENSMUSG00000004530 | 0.04827624 | -1.38851997  | Coro1c        |
| ENSMUSG00000022812 | 0.01355805 | -1.389317705 | Gsk3b         |
| ENSMUSG00000025738 | 0.03576511 | -1.389409452 | Fbxl16        |
| ENSMUSG00000020069 | 0.01683497 | -1.390750663 | Hnrnp3        |
| ENSMUSG00000035199 | 0.01530151 | -1.391808208 | Arl6ip5       |
| ENSMUSG00000079111 | 0.04237637 | -1.394687368 | Kdelr2        |
| ENSMUSG00000003810 | 0.04687617 | -1.394989309 | Mast2         |
| ENSMUSG00000057230 | 0.04793499 | -1.395355529 | Aak1          |
| ENSMUSG00000022636 | 0.03227951 | -1.399655979 | Alcam         |
| ENSMUSG00000027603 | 0.02190227 | -1.402185519 | Ggt7          |

|                     |            |              |               |
|---------------------|------------|--------------|---------------|
| ENSMUSG00000028633  | 0.04046893 | -1.40264866  | Ctps          |
| ENSMUSG00000021066  | 0.04350988 | -1.403733494 | Atl1          |
| ENSMUSG00000025261  | 0.02523502 | -1.404149133 | Huwe1         |
| ENSMUSG00000022587  | 0.04264002 | -1.40481491  | Ly6e          |
| ENSMUSG00000003438  | 0.02361189 | -1.405113752 | Timm50        |
| ENSMUSG00000056854  | 0.0382905  | -1.408350071 | Pou3f4        |
| ENSMUSG00000036054  | 0.02804332 | -1.408822716 | Sugp2         |
| ENSMUSG00000062380  | 0.01016015 | -1.40902616  | Tubb3         |
| ENSMUSG00000038143  | 0.03821772 | -1.409369849 | Stox2         |
| ENSMUSG00000024969  | 0.01971269 | -1.412541322 | Mark2         |
| ENSMUSG00000024381  | 0.01625976 | -1.41254876  | Bin1          |
| ENSMUSG00000034930  | 0.02980274 | -1.412881026 | Rtkn          |
| ENSMUSG00000025068  | 0.0336174  | -1.415496656 | Gsto1         |
| ENSMUSG00000014873  | 0.03670003 | -1.416592576 | Surf2         |
| ENSMUSG00000024736  | 0.03521056 | -1.416638274 | Tmem132a      |
| ENSMUSG00000041000  | 0.04743766 | -1.416759687 | Trim62        |
| ENSMUSG00000005057  | 0.04274669 | -1.416858665 | Sh2b2         |
| ENSMUSG00000024896  | 0.02095193 | -1.416957299 | Minpp1        |
| ENSMUSG00000059851  | 0.03369116 | -1.417954582 | Suv420h2      |
| ENSMUSG00000002012  | 0.0387476  | -1.41809835  | Pnck          |
| ENSMUSG00000031728  | 0.03208979 | -1.419030463 | Zfp821        |
| ENSMUSG00000040661  | 0.04768148 | -1.419261388 | Rad54l2       |
| ENSMUSG00000026238  | 0.03074773 | -1.419325729 | Ptma          |
| ENSMUSG00000023018  | 0.011359   | -1.419609347 | Smarcd1       |
| ENSMUSG00000028069  | 0.04713515 | -1.419911257 | Gpatch4       |
| ENSMUSG00000022044  | 0.02375854 | -1.420995641 | Stmn4         |
| ENSMUSG00000028656  | 0.04313221 | -1.42233396  | Cap1          |
| ENSMUSG00000022203  | 0.01008005 | -1.423494962 | Efs           |
| ENSMUSG00000042873  | 0.02904416 | -1.423936644 | Lhfp14        |
| ENSMUSG00000036862  | 0.01828578 | -1.427027419 | Dchs1         |
| ENSMUSG00000042570  | 0.03110128 | -1.428847956 | Mier2         |
| ENSMUSG00000026566  | 0.00502352 | -1.429840064 | Mpz1          |
| ENSMUSG00000024050  | 0.03403026 | -1.429861855 | Wiz           |
| ENSMUSG00000017478  | 0.03846767 | -1.430134574 | Zc3h18        |
| ENSMUSG00000036934  | 0.03202547 | -1.43074294  | 4921524J17Rik |
| ENSMUSG00000002997  | 0.04534381 | -1.433439937 | Prkar2b       |
| ENSMUSG00000011960  | 0.02504188 | -1.434725421 | Ccnt1         |
| ENSMUSG000000059316 | 0.0244491  | -1.434936445 | Slc27a4       |
| ENSMUSG00000004865  | 0.02151602 | -1.436301425 | Srpk1         |
| ENSMUSG00000069565  | 0.03205913 | -1.437544904 | Dazap1        |
| ENSMUSG00000029581  | 0.01126574 | -1.440117395 | Fscn1         |
| ENSMUSG00000017132  | 0.03617534 | -1.440235581 | Cyth1         |
| ENSMUSG00000030268  | 0.0187273  | -1.440407644 | Bcat1         |
| ENSMUSG00000036036  | 0.04599138 | -1.440748672 | Zfp57         |
| ENSMUSG00000020594  | 0.04887234 | -1.442405155 | Pum2          |
| ENSMUSG00000006585  | 0.02732231 | -1.442697819 | Cdt1          |
| ENSMUSG00000031029  | 0.04577328 | -1.443050173 | Eif3f         |
| ENSMUSG00000048562  | 0.03196748 | -1.444787663 | Sp8           |
| ENSMUSG00000001248  | 0.00588564 | -1.444906043 | Gramd1a       |
| ENSMUSG00000027430  | 0.02268816 | -1.445665982 | Dtd1          |
| ENSMUSG00000073293  | 0.04466755 | -1.446946875 | Nudt10        |
| ENSMUSG00000003352  | 0.03667612 | -1.448138377 | Cacnb3        |
| ENSMUSG00000045128  | 0.04880371 | -1.448270607 | Rpl18a        |
| ENSMUSG00000036377  | 0.02454084 | -1.448667111 | C530008M17Rik |
| ENSMUSG00000032666  | 0.02831062 | -1.449109678 | 1700025G04Rik |
| ENSMUSG00000041119  | 0.01609341 | -1.44960948  | Pde9a         |
| ENSMUSG00000011832  | 0.00833138 | -1.450343945 | Evi5l         |
| ENSMUSG00000031144  | 0.02094303 | -1.453801296 | Syp           |
| ENSMUSG00000031393  | 0.01498165 | -1.456625503 | Mecp2         |
| ENSMUSG00000041420  | 0.02298575 | -1.457102525 | Meis3         |
| ENSMUSG00000019433  | 0.02711523 | -1.457858962 | Gipc1         |
| ENSMUSG00000040563  | 0.01580188 | -1.459152167 | Plppr2        |
| ENSMUSG00000027624  | 0.03518642 | -1.459886336 | Epb411l       |
| ENSMUSG00000054728  | 0.02504188 | -1.460117693 | Phactr1       |
| ENSMUSG00000032366  | 0.01376065 | -1.46037728  | Tpm1          |
| ENSMUSG00000056962  | 0.01475837 | -1.460779947 | Jmjd6         |
| ENSMUSG00000064341  | 0.00328632 | -1.461219925 | mt-Nd1        |
| ENSMUSG00000024897  | 0.04644094 | -1.463140308 | Apba1         |
| ENSMUSG00000008763  | 0.04138319 | -1.467278467 | Man1a2        |
| ENSMUSG00000031841  | 0.01475381 | -1.469520837 | Cdh13         |
| ENSMUSG00000105987  | 0.03516646 | -1.46959156  | AI506816      |
| ENSMUSG00000002028  | 0.03119834 | -1.469669285 | Kmt2a         |
| ENSMUSG00000069020  | 0.03912506 | -1.469927446 | Urm1          |
| ENSMUSG00000023009  | 0.03509283 | -1.470949861 | Nckap5l       |
| ENSMUSG00000023927  | 0.03223536 | -1.472174741 | Satb1         |

|                    |            |              |               |
|--------------------|------------|--------------|---------------|
| ENSMUSG00000063171 | 0.04627028 | -1.472651745 | Rps4l         |
| ENSMUSG00000035566 | 0.01623261 | -1.474763204 | Pcdh17        |
| ENSMUSG00000048458 | 0.0298118  | -1.476088024 | Fam212b       |
| ENSMUSG00000022185 | 0.03964854 | -1.477193476 | Acin1         |
| ENSMUSG00000029328 | 0.00488167 | -1.477501698 | Hnrnpdl       |
| ENSMUSG00000029104 | 0.04471681 | -1.479223929 | Htt           |
| ENSMUSG00000030226 | 0.03348847 | -1.479456092 | Lmo3          |
| ENSMUSG00000058706 | 0.04440704 | -1.479935266 | 0610030E20Rik |
| ENSMUSG00000032040 | 0.02027693 | -1.480257305 | Dcps          |
| ENSMUSG00000033307 | 0.03509283 | -1.481390199 | Mif           |
| ENSMUSG00000047888 | 0.01900102 | -1.48352912  | Tnrc6b        |
| ENSMUSG00000021697 | 0.0283579  | -1.483658396 | Depdc1b       |
| ENSMUSG00000026623 | 0.03468868 | -1.483772561 | Lpgat1        |
| ENSMUSG00000028639 | 0.02523502 | -1.483776933 | Ybx1          |
| ENSMUSG00000027932 | 0.04255631 | -1.483837321 | Slc27a3       |
| ENSMUSG00000025221 | 0.04961621 | -1.484644426 | Kcnp2         |
| ENSMUSG00000034799 | 0.02606117 | -1.485717716 | Unc13a        |
| ENSMUSG00000007670 | 0.02423189 | -1.485754747 | Khgrp         |
| ENSMUSG00000028974 | 0.03022858 | -1.486515672 | Dffa          |
| ENSMUSG00000009828 | 0.01130047 | -1.487653204 | Ick           |
| ENSMUSG00000060860 | 0.04908223 | -1.487692829 | Ube2s         |
| ENSMUSG00000039717 | 0.03576511 | -1.489146357 | Raly1         |
| ENSMUSG00000074682 | 0.04178276 | -1.490364613 | Zcchc3        |
| ENSMUSG00000020134 | 0.02068171 | -1.49037361  | Peli1         |
| ENSMUSG00000024222 | 0.02647591 | -1.490722854 | Fkbp5         |
| ENSMUSG00000025630 | 0.01297027 | -1.491599529 | Hprt          |
| ENSMUSG00000056900 | 0.04151084 | -1.492388156 | Usp13         |
| ENSMUSG00000015165 | 0.01008005 | -1.492640211 | Hnrnp1        |
| ENSMUSG00000012848 | 0.03017358 | -1.492761013 | Rps5          |
| ENSMUSG00000034748 | 0.04478279 | -1.492885712 | Sirt6         |
| ENSMUSG00000029823 | 0.01856067 | -1.493502078 | Luc7l2        |
| ENSMUSG00000033565 | 0.02314144 | -1.493548802 | Rbfox2        |
| ENSMUSG00000029121 | 0.00267875 | -1.493988966 | Crmp1         |
| ENSMUSG00000024472 | 0.04776761 | -1.494470452 | Dcp2          |
| ENSMUSG00000022433 | 0.04926434 | -1.495676496 | Csnk1e        |
| ENSMUSG00000028081 | 0.03628718 | -1.496241204 | Rps3a1        |
| ENSMUSG00000029642 | 0.04599138 | -1.497735069 | Polr1d        |
| ENSMUSG00000033981 | 0.01353585 | -1.497777741 | Gria2         |
| ENSMUSG00000033004 | 0.01011956 | -1.498463404 | Mycbp2        |
| ENSMUSG00000030595 | 0.02312817 | -1.500023181 | Nfkbib        |
| ENSMUSG00000064370 | 0.0051786  | -1.500102643 | mt-Cytb       |
| ENSMUSG00000048895 | 0.01975966 | -1.501886502 | Cdk5r1        |
| ENSMUSG00000022048 | 0.00938757 | -1.503411994 | Dpysl2        |
| ENSMUSG00000038256 | 0.04063175 | -1.503463815 | Bcl9          |
| ENSMUSG00000027500 | 0.00555141 | -1.503844779 | Stmn2         |
| ENSMUSG00000022415 | 0.01809706 | -1.504016203 | Syng1         |
| ENSMUSG00000020692 | 0.04068114 | -1.504106203 | Nle1          |
| ENSMUSG00000074622 | 0.04034458 | -1.506728509 | Mafb          |
| ENSMUSG00000006651 | 0.00855538 | -1.507320575 | Aplp1         |
| ENSMUSG00000066036 | 0.01418266 | -1.509824887 | Ubr4          |
| ENSMUSG00000022521 | 0.01820823 | -1.510183531 | Crebbp        |
| ENSMUSG00000035835 | 0.00679512 | -1.512250419 | Plppr3        |
| ENSMUSG0000001036  | 0.01523733 | -1.514440399 | Epn2          |
| ENSMUSG00000030209 | 0.04971717 | -1.516102868 | Grin2b        |
| ENSMUSG00000052512 | 0.00792031 | -1.517098862 | Nav2          |
| ENSMUSG00000062647 | 0.04753476 | -1.517242382 | Rpl7a         |
| ENSMUSG00000033022 | 0.01164611 | -1.517347567 | Cdo1          |
| ENSMUSG00000043090 | 0.03175802 | -1.519779937 | Zfp866        |
| ENSMUSG00000006575 | 0.01411245 | -1.520142356 | Rundc3a       |
| ENSMUSG00000020592 | 0.011359   | -1.520319175 | Sdc1          |
| ENSMUSG00000036698 | 0.0283579  | -1.521174876 | Ago2          |
| ENSMUSG00000057134 | 0.01179285 | -1.52210854  | Ado           |
| ENSMUSG00000019841 | 0.02011393 | -1.523301986 | Rev3l         |
| ENSMUSG00000064345 | 0.0149748  | -1.524039377 | mt-Nd2        |
| ENSMUSG00000020262 | 0.03304611 | -1.524377142 | Adarb1        |
| ENSMUSG00000064368 | 0.03328992 | -1.524987242 | mt-Nd6        |
| ENSMUSG00000027692 | 0.0126239  | -1.525179316 | Tnik          |
| ENSMUSG00000044533 | 0.02312817 | -1.526029992 | Rps2          |
| ENSMUSG0000007021  | 0.0086611  | -1.528755589 | Syng3         |
| ENSMUSG00000004031 | 0.02764364 | -1.529244289 | Brinp2        |
| ENSMUSG00000029836 | 0.01891256 | -1.529940673 | Cbx3          |
| ENSMUSG00000004933 | 0.02520224 | -1.53033777  | Matk          |
| ENSMUSG00000007880 | 0.01852366 | -1.530610077 | Arid1a        |
| ENSMUSG00000015766 | 0.04908223 | -1.530637991 | Eps8          |
| ENSMUSG00000091337 | 0.00402041 | -1.531705473 | Eid1          |

|                    |            |              |               |
|--------------------|------------|--------------|---------------|
| ENSMUSG00000042826 | 0.02746066 | -1.531779823 | Fgf11         |
| ENSMUSG00000026247 | 0.04429453 | -1.532252843 | Ecel1         |
| ENSMUSG00000032549 | 0.00693157 | -1.532969197 | Rab6b         |
| ENSMUSG00000022999 | 0.01513392 | -1.533292401 | Lmbr1l        |
| ENSMUSG00000031934 | 0.01949399 | -1.53335752  | Panx1         |
| ENSMUSG00000028820 | 0.03156284 | -1.533520408 | Sfpq          |
| ENSMUSG00000006442 | 0.01712795 | -1.534226646 | Srm           |
| ENSMUSG00000056592 | 0.04440704 | -1.535317341 | Zfp658        |
| ENSMUSG00000025855 | 0.00738181 | -1.535806239 | Prkar1b       |
| ENSMUSG00000038861 | 0.04152255 | -1.535905347 | Pi4kb         |
| ENSMUSG00000049658 | 0.02049142 | -1.53619791  | Bdp1          |
| ENSMUSG00000039852 | 0.01132469 | -1.538127919 | Rere          |
| ENSMUSG00000023033 | 0.04568435 | -1.539384621 | Scn8a         |
| ENSMUSG00000026854 | 0.02945507 | -1.539778852 | Usp20         |
| ENSMUSG00000043300 | 0.02221832 | -1.541266758 | B3galnt1      |
| ENSMUSG00000038984 | 0.02149767 | -1.541604224 | Tspyl5        |
| ENSMUSG00000061589 | 0.01887502 | -1.541950547 | Dot1l         |
| ENSMUSG00000044117 | 0.0054888  | -1.543214727 | 2900011O08Rik |
| ENSMUSG00000042699 | 0.00930991 | -1.545624469 | Dhx9          |
| ENSMUSG00000038900 | 0.04121643 | -1.546451938 | Rpl12         |
| ENSMUSG00000018398 | 0.0042414  | -1.546511243 | 42986         |
| ENSMUSG00000051910 | 0.00357008 | -1.547512993 | Sox6          |
| ENSMUSG00000059273 | 0.011414   | -1.54821614  | Zc3h4         |
| ENSMUSG00000045589 | 0.01268313 | -1.54847843  | Frrs1l        |
| ENSMUSG00000045348 | 0.02000573 | -1.548938608 | Nyap1         |
| ENSMUSG00000024044 | 0.03513546 | -1.549868107 | Epb41l3       |
| ENSMUSG00000014837 | 0.01847436 | -1.550729569 | 4931428F04Rik |
| ENSMUSG00000039735 | 0.01088098 | -1.551153317 | Fnbp1l        |
| ENSMUSG00000029714 | 0.03176152 | -1.55188912  | Gigyf1        |
| ENSMUSG00000028399 | 0.01164877 | -1.552293799 | Ptprd         |
| ENSMUSG00000048355 | 0.0178517  | -1.55255626  | Arxes1        |
| ENSMUSG00000037846 | 0.01599636 | -1.552849761 | Rtkn2         |
| ENSMUSG00000035934 | 0.01887419 | -1.553092303 | Pknox2        |
| ENSMUSG00000029290 | 0.03085233 | -1.55533432  | Zfp326        |
| ENSMUSG00000027350 | 0.01223708 | -1.556008306 | Chgb          |
| ENSMUSG00000044707 | 0.04608693 | -1.557010156 | Ccnjl         |
| ENSMUSG00000033152 | 0.03095964 | -1.557214754 | Podxl2        |
| ENSMUSG00000022208 | 0.03468868 | -1.558369877 | Jph4          |
| ENSMUSG00000068284 | 0.0441743  | -1.558425064 | Usf3          |
| ENSMUSG00000050310 | 0.02617596 | -1.558714614 | Rictor        |
| ENSMUSG00000008668 | 0.03072834 | -1.559325145 | Rps18         |
| ENSMUSG00000029712 | 0.01761165 | -1.560808377 | Actl6b        |
| ENSMUSG00000062115 | 0.02599926 | -1.561966335 | Rai1          |
| ENSMUSG00000022358 | 0.03938439 | -1.56401709  | Fbxo32        |
| ENSMUSG00000029814 | 0.02945753 | -1.564234745 | Igf2bp3       |
| ENSMUSG00000022010 | 0.00282479 | -1.564826147 | Tsc22d1       |
| ENSMUSG00000069495 | 0.03866454 | -1.564952622 | Epc2          |
| ENSMUSG00000034595 | 0.02756754 | -1.565764725 | Ppp1r18       |
| ENSMUSG00000062937 | 0.00499867 | -1.567316744 | Mtap          |
| ENSMUSG00000023328 | 0.03513546 | -1.567377851 | Ache          |
| ENSMUSG00000027201 | 0.02000051 | -1.568403904 | Myef2         |
| ENSMUSG00000026121 | 0.01797583 | -1.568638565 | Sema4c        |
| ENSMUSG00000030806 | 0.02022429 | -1.569142306 | Stx1b         |
| ENSMUSG00000036022 | 0.03898092 | -1.571242375 | Fam122b       |
| ENSMUSG00000055430 | 0.00331595 | -1.571264257 | Nap1l5        |
| ENSMUSG00000024268 | 0.00828958 | -1.571462898 | Celf4         |
| ENSMUSG00000038777 | 0.02063735 | -1.571769416 | Sema6c        |
| ENSMUSG00000026489 | 0.03202547 | -1.571897485 | Coq8a         |
| ENSMUSG00000032518 | 0.02251402 | -1.571996771 | Rpsa          |
| ENSMUSG00000029802 | 0.03411436 | -1.573530626 | Abcg2         |
| ENSMUSG00000030659 | 0.03365225 | -1.573740968 | Nuch2         |
| ENSMUSG00000030272 | 0.02026938 | -1.573859208 | Camk1         |
| ENSMUSG00000051379 | 0.0219667  | -1.574235447 | Flrt3         |
| ENSMUSG00000004895 | 0.03008604 | -1.576270609 | Prcc          |
| ENSMUSG00000026113 | 0.04644094 | -1.578043651 | Inpp4a        |
| ENSMUSG00000029673 | 0.01456621 | -1.580657008 | Auts2         |
| ENSMUSG00000037217 | 0.00454373 | -1.580839374 | Syn1          |
| ENSMUSG00000022844 | 0.01486301 | -1.580861313 | Pdia5         |
| ENSMUSG00000020520 | 0.00521016 | -1.581360275 | Galnt10       |
| ENSMUSG00000038342 | 0.02404902 | -1.582218344 | Mlxip         |
| ENSMUSG00000040631 | 0.04215538 | -1.583012094 | Dok4          |
| ENSMUSG00000058756 | 0.00688789 | -1.583345675 | Thra          |
| ENSMUSG00000028524 | 0.04152255 | -1.584380597 | Sgip1         |
| ENSMUSG00000041263 | 0.04350988 | -1.584546515 | Rusc1         |
| ENSMUSG00000033208 | 0.01154933 | -1.584975842 | S100b         |



|                    |            |              |               |
|--------------------|------------|--------------|---------------|
| ENSMUSG00000027799 | 0.01359707 | -1.585861251 | Nbea          |
| ENSMUSG00000047284 | 0.01523733 | -1.585927126 | Neur14        |
| ENSMUSG00000034593 | 0.0087902  | -1.586265628 | Myo5a         |
| ENSMUSG00000064363 | 0.01457713 | -1.587142093 | mt-Nd4        |
| ENSMUSG00000027273 | 0.01096649 | -1.587487034 | Snap25        |
| ENSMUSG00000006731 | 0.01988762 | -1.587557732 | B4galnt1      |
| ENSMUSG00000031904 | 0.011359   | -1.587784944 | Slc7a6        |
| ENSMUSG00000026103 | 0.01179285 | -1.587806232 | Gls           |
| ENSMUSG00000027784 | 0.00462636 | -1.588754889 | Ppm1l         |
| ENSMUSG00000030671 | 0.03442622 | -1.588923806 | Pde3b         |
| ENSMUSG00000031285 | 0.00886318 | -1.590002083 | Dcx           |
| ENSMUSG00000053825 | 0.03285088 | -1.590004732 | Ppfia2        |
| ENSMUSG00000019699 | 0.04103542 | -1.590105961 | Akt3          |
| ENSMUSG00000023118 | 0.0059303  | -1.5911752   | Sympk         |
| ENSMUSG00000029647 | 0.0278672  | -1.591755384 | Pan3          |
| ENSMUSG00000042272 | 0.02314144 | -1.592064013 | Sestd1        |
| ENSMUSG00000050910 | 0.02823485 | -1.592572625 | Cdr2l         |
| ENSMUSG00000034832 | 0.00601868 | -1.593749606 | Tet3          |
| ENSMUSG00000059005 | 0.03540411 | -1.595039936 | Hnrnpa3       |
| ENSMUSG00000034883 | 0.02825556 | -1.595416669 | Lrr1          |
| ENSMUSG00000046806 | 0.04983945 | -1.596780924 | 3110062M04Rik |
| ENSMUSG00000037111 | 0.02869071 | -1.598667592 | Setd7         |
| ENSMUSG00000037243 | 0.01854227 | -1.599197297 | Zfp692        |
| ENSMUSG00000041040 | 0.02945507 | -1.599394328 | Fam117b       |
| ENSMUSG00000036046 | 0.01331504 | -1.599529935 | 5031439G07Rik |
| ENSMUSG00000040249 | 0.0036063  | -1.601698185 | Lrp1          |
| ENSMUSG00000020190 | 0.04559083 | -1.602106745 | Mknk2         |
| ENSMUSG00000028051 | 0.02890272 | -1.602435344 | Hcn3          |
| ENSMUSG00000061411 | 0.01137193 | -1.602478982 | Nol4l         |
| ENSMUSG00000036533 | 0.03347988 | -1.606295363 | Cdc42ep3      |
| ENSMUSG00000020785 | 0.03208979 | -1.607610064 | Camkk1        |
| ENSMUSG00000041417 | 0.00443352 | -1.60815564  | Pik3r1        |
| ENSMUSG00000020547 | 0.00202661 | -1.609105609 | Bzw2          |
| ENSMUSG00000069114 | 0.04391688 | -1.609385668 | Zbtb10        |
| ENSMUSG00000022456 | 0.00795475 | -1.609474157 | 42981         |
| ENSMUSG00000009927 | 0.01938401 | -1.611786137 | Rps25         |
| ENSMUSG00000042757 | 0.00517399 | -1.612130109 | Tmem108       |
| ENSMUSG00000027577 | 0.0187273  | -1.613366925 | Chrna4        |
| ENSMUSG00000029757 | 0.0277014  | -1.6137147   | Dync1i1       |
| ENSMUSG00000028545 | 0.01592057 | -1.615812118 | Bend5         |
| ENSMUSG00000005447 | 0.02963159 | -1.616178661 | Pafah1b3      |
| ENSMUSG00000005442 | 0.02409    | -1.617478221 | Cic           |
| ENSMUSG00000029108 | 0.01419251 | -1.618631485 | Pcdh7         |
| ENSMUSG00000000915 | 0.01331947 | -1.619818848 | Hip1r         |
| ENSMUSG00000047446 | 0.00287694 | -1.62044843  | Arl4a         |
| ENSMUSG00000027669 | 0.0104998  | -1.621312277 | Gnb4          |
| ENSMUSG00000014786 | 0.02607539 | -1.621405834 | Slc9a5        |
| ENSMUSG00000059796 | 0.00272778 | -1.622331533 | Eif4a1        |
| ENSMUSG00000034254 | 0.00993475 | -1.627073588 | Agpat1        |
| ENSMUSG00000019843 | 0.00248102 | -1.627197876 | Fyn           |
| ENSMUSG00000057897 | 0.00871879 | -1.628836626 | Camk2b        |
| ENSMUSG00000030683 | 0.03357446 | -1.629880522 | Sez6l2        |
| ENSMUSG00000056679 | 0.04542383 | -1.630521562 | Gpr173        |
| ENSMUSG00000058761 | 0.04644014 | -1.631207051 | Rnf169        |
| ENSMUSG00000000823 | 0.01428512 | -1.631588246 | Zfp512b       |
| ENSMUSG00000041907 | 0.031082   | -1.63175338  | Gpr45         |
| ENSMUSG00000041570 | 0.02234368 | -1.631842711 | Camsap2       |
| ENSMUSG00000030000 | 0.00385188 | -1.633997378 | Add2          |
| ENSMUSG00000011884 | 0.00361286 | -1.634029269 | Gltp          |
| ENSMUSG00000039716 | 0.01339023 | -1.634084308 | Dock3         |
| ENSMUSG00000060314 | 0.04537405 | -1.636043385 | Zfp941        |
| ENSMUSG00000003863 | 0.02452035 | -1.637063411 | Ppfia3        |
| ENSMUSG00000037126 | 0.00656711 | -1.637432683 | Psd           |
| ENSMUSG00000031642 | 0.0411698  | -1.63810127  | Sh3rf1        |
| ENSMUSG00000037896 | 0.04189791 | -1.638196193 | Rcor1         |
| ENSMUSG00000046330 | 0.03967527 | -1.639534235 | Rpl37a        |
| ENSMUSG00000027966 | 0.03605386 | -1.641499605 | Col11a1       |
| ENSMUSG00000051243 | 0.01745585 | -1.641512974 | Islr2         |
| ENSMUSG00000087620 | 0.03961972 | -1.641922449 | 5330434G04Rik |
| ENSMUSG00000021936 | 0.02523502 | -1.642706357 | Mapk8         |
| ENSMUSG00000021754 | 0.00502352 | -1.643207966 | Map3k1        |
| ENSMUSG00000058230 | 0.02504188 | -1.643275867 | Arhgap35      |
| ENSMUSG00000046449 | 0.02026938 | -1.643902851 | C77370        |
| ENSMUSG00000055670 | 0.01359707 | -1.644324927 | Zzef1         |
| ENSMUSG00000023495 | 0.0034695  | -1.645509453 | Pcbp4         |

|                     |            |              |          |
|---------------------|------------|--------------|----------|
| ENSMUSG00000038538  | 0.00993285 | -1.645777927 | Ubn2     |
| ENSMUSG00000029120  | 0.04865198 | -1.647615414 | Ppp2r2c  |
| ENSMUSG00000030600  | 0.01819837 | -1.64797177  | Lrfn1    |
| ENSMUSG00000061601  | 0.03409088 | -1.648175056 | Pclo     |
| ENSMUSG000000106019 | 0.01456621 | -1.648973848 | Gm43672  |
| ENSMUSG00000028137  | 0.03986873 | -1.649956805 | Celf3    |
| ENSMUSG00000034248  | 0.0317176  | -1.6501127   | Slc25a37 |
| ENSMUSG00000032288  | 0.01572527 | -1.650444912 | Imp3     |
| ENSMUSG00000032724  | 0.01999568 | -1.651332312 | Abtb2    |
| ENSMUSG00000038002  | 0.04216091 | -1.654681174 | Cramp1l  |
| ENSMUSG00000044433  | 0.02015632 | -1.65647404  | Camsap3  |
| ENSMUSG00000033419  | 0.03305518 | -1.657334969 | Snap91   |
| ENSMUSG00000053693  | 0.04104244 | -1.659426883 | Mast1    |
| ENSMUSG00000060780  | 0.01382792 | -1.661777633 | Lrrtm1   |
| ENSMUSG00000029438  | 0.00769637 | -1.662201611 | Bcl7a    |
| ENSMUSG00000021303  | 0.013718   | -1.663392653 | Gng4     |
| ENSMUSG00000036948  | 0.01188729 | -1.663404074 | BC037034 |
| ENSMUSG00000046699  | 0.04827438 | -1.665356114 | Slitrk4  |
| ENSMUSG00000031840  | 0.00474065 | -1.667474731 | Rab3a    |
| ENSMUSG00000047675  | 0.03748817 | -1.668339559 | Rps8     |
| ENSMUSG00000032265  | 0.03967527 | -1.668362741 | Fam46a   |
| ENSMUSG00000030795  | 0.00357088 | -1.669255068 | Fus      |
| ENSMUSG00000043895  | 0.01215153 | -1.669981762 | S1pr2    |
| ENSMUSG0000004383   | 0.01359707 | -1.670624222 | Large    |
| ENSMUSG00000036466  | 0.04391777 | -1.670892523 | Megf11   |
| ENSMUSG00000097451  | 0.04230269 | -1.672483646 | Rian     |
| ENSMUSG00000043388  | 0.00801069 | -1.673747057 | Tmem130  |
| ENSMUSG00000050822  | 0.00414279 | -1.674006466 | Slc29a4  |
| ENSMUSG0000005533   | 0.01162396 | -1.674270777 | Igf1r    |
| ENSMUSG00000054737  | 0.04210887 | -1.675026253 | Zfp182   |
| ENSMUSG00000019878  | 0.01339023 | -1.675865981 | Hsf2     |
| ENSMUSG00000082229  | 0.027393   | -1.67698378  | Nap1l2   |
| ENSMUSG00000053199  | 0.02290499 | -1.677660704 | Arhgap20 |
| ENSMUSG00000038486  | 0.00677475 | -1.678203055 | Sv2a     |
| ENSMUSG00000026344  | 0.01988762 | -1.679656755 | Lypd1    |
| ENSMUSG00000025451  | 0.04344242 | -1.680433031 | Paip1    |
| ENSMUSG00000031012  | 0.00328632 | -1.68218335  | Cask     |
| ENSMUSG00000023019  | 0.00386411 | -1.6831029   | Gpd1     |
| ENSMUSG00000027584  | 0.01722102 | -1.687893185 | Oprl1    |
| ENSMUSG00000029478  | 0.01167308 | -1.688049586 | Ncor2    |
| ENSMUSG00000041268  | 0.02504188 | -1.689622996 | Dmxl2    |
| ENSMUSG00000027293  | 0.03593691 | -1.689654129 | Ehd4     |
| ENSMUSG00000031790  | 0.00531806 | -1.691075926 | Mmp15    |
| ENSMUSG00000020173  | 0.01615997 | -1.692632069 | Cobl     |
| ENSMUSG00000061436  | 0.00474303 | -1.693705743 | Hipk2    |
| ENSMUSG00000034818  | 0.03150867 | -1.693926837 | Celf5    |
| ENSMUSG00000097767  | 0.02625888 | -1.696176785 | Miat     |
| ENSMUSG00000097195  | 0.01382109 | -1.697437263 | Snhg5    |
| ENSMUSG00000056812  | 0.01130047 | -1.697875684 | St8sia3  |
| ENSMUSG00000037887  | 0.01072221 | -1.698009871 | Dusp8    |
| ENSMUSG00000075028  | 0.0462589  | -1.698354653 | Prdm11   |
| ENSMUSG00000037029  | 0.03820727 | -1.698722601 | Zfp146   |
| ENSMUSG00000018411  | 0.00331774 | -1.698914633 | Mapt     |
| ENSMUSG00000015202  | 0.01179285 | -1.699128984 | Cnksr3   |
| ENSMUSG00000042460  | 0.01638503 | -1.70094751  | C1galt1  |
| ENSMUSG00000052372  | 0.02446945 | -1.701482764 | Il1rapl1 |
| ENSMUSG00000033578  | 0.0036604  | -1.701582507 | Tmem35a  |
| ENSMUSG00000086290  | 0.02758395 | -1.702811755 | Snhg12   |
| ENSMUSG00000040653  | 0.00795475 | -1.702924153 | Ppp1r14c |
| ENSMUSG00000038020  | 0.04559083 | -1.7029965   | Rapgef1  |
| ENSMUSG0000003657   | 0.00445236 | -1.704708027 | Calb2    |
| ENSMUSG00000053046  | 0.04420675 | -1.706553309 | Brsk2    |
| ENSMUSG00000079481  | 0.04583538 | -1.707907302 | Nhsl2    |
| ENSMUSG00000074461  | 0.02945507 | -1.707914438 | Gm10699  |
| ENSMUSG00000005125  | 0.02582963 | -1.712432213 | Ndrp1    |
| ENSMUSG00000025576  | 0.01854227 | -1.713451388 | Rbfox3   |
| ENSMUSG00000001786  | 0.00302478 | -1.713454934 | Fbxo7    |
| ENSMUSG00000041729  | 0.0054119  | -1.717359783 | Coro2b   |
| ENSMUSG00000037110  | 0.03223586 | -1.719050393 | Ralgapa2 |
| ENSMUSG00000098234  | 0.04793499 | -1.719184555 | Snhg6    |
| ENSMUSG00000028634  | 0.03549521 | -1.719289373 | Hivep3   |
| ENSMUSG00000038648  | 0.01847436 | -1.71956753  | Creb3l2  |
| ENSMUSG00000045007  | 0.02461703 | -1.719875001 | Tubg2    |
| ENSMUSG00000024084  | 0.01274075 | -1.720250575 | Qpct     |
| ENSMUSG00000052551  | 0.01621044 | -1.721578127 | Adarb2   |

|                    |            |              |               |
|--------------------|------------|--------------|---------------|
| ENSMUSG00000055421 | 0.00746768 | -1.721755062 | Pcdh9         |
| ENSMUSG00000029765 | 0.01325837 | -1.721847107 | Plxna4        |
| ENSMUSG00000073557 | 0.02891573 | -1.723610775 | Ppp1r12b      |
| ENSMUSG00000028572 | 0.0398016  | -1.724178348 | Hook1         |
| ENSMUSG00000042401 | 0.00895634 | -1.724559622 | Crtac1        |
| ENSMUSG00000026558 | 0.00714131 | -1.724898945 | Uck2          |
| ENSMUSG00000031409 | 0.04391688 | -1.726881931 | Tcea16        |
| ENSMUSG00000094910 | 0.00544791 | -1.727373877 | D430019H16Rik |
| ENSMUSG0000004626  | 0.03846909 | -1.727835172 | Stxbp2        |
| ENSMUSG00000026812 | 0.00661108 | -1.728301675 | Tsc1          |
| ENSMUSG00000046546 | 0.01123193 | -1.730401206 | Fam43a        |
| ENSMUSG00000027581 | 0.00793891 | -1.730884541 | Stmn3         |
| ENSMUSG00000068373 | 0.01887502 | -1.731882413 | D430041D05Rik |
| ENSMUSG00000033214 | 0.04012413 | -1.733640631 | Slitrk5       |
| ENSMUSG00000026278 | 0.00532416 | -1.734679785 | Bok           |
| ENSMUSG0000007944  | 0.02022759 | -1.735414013 | Ttc9b         |
| ENSMUSG00000109321 | 0.02130535 | -1.735416294 | A330076H08Rik |
| ENSMUSG00000024260 | 0.0117712  | -1.735933518 | Sap130        |
| ENSMUSG00000042388 | 0.01518916 | -1.739549034 | Dlgap3        |
| ENSMUSG00000050022 | 0.01073947 | -1.739760239 | Amz1          |
| ENSMUSG00000034269 | 0.00774959 | -1.741977827 | Setd5         |
| ENSMUSG0000005045  | 0.01293665 | -1.74288601  | Chd5          |
| ENSMUSG00000042390 | 0.00692083 | -1.743838506 | Gatad2b       |
| ENSMUSG00000056413 | 0.03685827 | -1.746131433 | Adap1         |
| ENSMUSG00000040003 | 0.00486166 | -1.746217709 | Magi2         |
| ENSMUSG00000029580 | 0.00344228 | -1.74667949  | Actb          |
| ENSMUSG00000025870 | 0.02505064 | -1.750123203 | Arl10         |
| ENSMUSG00000069601 | 0.00385188 | -1.752180606 | Ank3          |
| ENSMUSG00000058006 | 0.01011956 | -1.753435019 | Mdn1          |
| ENSMUSG00000025889 | 0.00793891 | -1.753936985 | Snca          |
| ENSMUSG0000007207  | 0.01273538 | -1.755049811 | Stx1a         |
| ENSMUSG00000039328 | 0.00142779 | -1.756992579 | Rnf122        |
| ENSMUSG00000098702 | 0.03301028 | -1.75811154  | 1500015A07Rik |
| ENSMUSG00000030657 | 0.00402041 | -1.75841435  | Xylt1         |
| ENSMUSG00000051331 | 0.03536083 | -1.75966313  | Cacna1c       |
| ENSMUSG00000051242 | 0.01540233 | -1.76352096  | Pcdhb9        |
| ENSMUSG00000008153 | 0.00837206 | -1.76388648  | Clstn3        |
| ENSMUSG00000022935 | 0.01707207 | -1.764793144 | Grik1         |
| ENSMUSG00000053519 | 0.00577439 | -1.764990992 | Kcnip1        |
| ENSMUSG00000051550 | 0.00422517 | -1.767989884 | Zfp579        |
| ENSMUSG00000036882 | 0.00322412 | -1.76829275  | Arhgap33      |
| ENSMUSG00000017376 | 0.00908995 | -1.768803355 | Nlk           |
| ENSMUSG00000059146 | 0.00536411 | -1.769850454 | Ntrk3         |
| ENSMUSG00000089809 | 0.00250272 | -1.769971946 | A930011G23Rik |
| ENSMUSG00000024240 | 0.00430873 | -1.772881383 | Epc1          |
| ENSMUSG00000004366 | 0.03540411 | -1.773433263 | Sst           |
| ENSMUSG00000110523 | 0.01304152 | -1.773546677 | RP24-94F12.2  |
| ENSMUSG00000006930 | 0.001669   | -1.775043437 | Hap1          |
| ENSMUSG00000042594 | 0.01767902 | -1.775674868 | Sh2b3         |
| ENSMUSG00000042744 | 0.01072382 | -1.779579611 | Gm15800       |
| ENSMUSG00000049804 | 0.01146311 | -1.779803195 | Armcx4        |
| ENSMUSG00000058966 | 0.0323242  | -1.780892621 | Fam57b        |
| ENSMUSG00000042364 | 0.00344228 | -1.781515368 | Snx18         |
| ENSMUSG00000022994 | 0.01573475 | -1.782460228 | Adcy6         |
| ENSMUSG00000028358 | 0.01562252 | -1.782573566 | Zfp618        |
| ENSMUSG00000052852 | 0.01428512 | -1.782774271 | Reep1         |
| ENSMUSG00000030435 | 0.00657936 | -1.785681796 | U2af2         |
| ENSMUSG00000052364 | 0.04384094 | -1.786424237 | B630019K06Rik |
| ENSMUSG00000041235 | 0.00224911 | -1.786963109 | Chd7          |
| ENSMUSG00000046691 | 0.00738181 | -1.787399148 | Chtf8         |
| ENSMUSG00000030852 | 0.00256581 | -1.788730938 | Tacc2         |
| ENSMUSG00000008658 | 0.02094303 | -1.790323797 | Rbfox1        |
| ENSMUSG00000079523 | 0.03224458 | -1.790445148 | Tmsb10        |
| ENSMUSG00000060568 | 0.03846767 | -1.790465473 | Fam78b        |
| ENSMUSG00000050071 | 0.01768529 | -1.790579823 | Bex1          |
| ENSMUSG00000048978 | 0.01312108 | -1.79411419  | Nrsn1         |
| ENSMUSG00000037172 | 0.01603883 | -1.795196406 | E330009J07Rik |
| ENSMUSG00000028804 | 0.01091424 | -1.795545557 | Csmd2         |
| ENSMUSG00000024299 | 0.00742829 | -1.796917898 | Adamts10      |
| ENSMUSG00000050954 | 0.02599926 | -1.797039597 | Zfp169        |
| ENSMUSG00000020121 | 0.02553223 | -1.79904286  | Srgap1        |
| ENSMUSG00000028937 | 0.00339108 | -1.799719789 | Acot7         |
| ENSMUSG00000075700 | 0.01998249 | -1.803032494 | Selt          |
| ENSMUSG00000038453 | 0.0146401  | -1.803765905 | Srcin1        |
| ENSMUSG00000070476 | 0.01359707 | -1.805243432 | Fam217b       |

|                    |            |              |               |
|--------------------|------------|--------------|---------------|
| ENSMUSG00000028654 | 0.00224529 | -1.806467634 | Mycl          |
| ENSMUSG00000041351 | 0.00096426 | -1.807948367 | Rap1gap       |
| ENSMUSG00000085385 | 0.00388182 | -1.809687468 | Snhg17        |
| ENSMUSG00000042436 | 0.01179285 | -1.810371108 | Mfap4         |
| ENSMUSG00000019235 | 0.01623261 | -1.810481225 | Rps6kl1       |
| ENSMUSG00000025427 | 0.03094331 | -1.810968606 | Rnf165        |
| ENSMUSG00000030223 | 0.04325823 | -1.811214238 | Ptpro         |
| ENSMUSG00000040907 | 0.00091505 | -1.811236181 | Atp1a3        |
| ENSMUSG00000055761 | 0.01475837 | -1.8122091   | Nkain3        |
| ENSMUSG00000033762 | 0.02039199 | -1.812826067 | Recql4        |
| ENSMUSG00000108414 | 0.01540233 | -1.814450404 | Snhg1         |
| ENSMUSG00000027238 | 0.0036063  | -1.816041193 | Frmf5         |
| ENSMUSG00000032503 | 0.00677734 | -1.816636248 | Arpp21        |
| ENSMUSG00000021258 | 0.04627028 | -1.8191637   | Ccnk          |
| ENSMUSG00000039838 | 0.02372143 | -1.828016633 | Slc45a1       |
| ENSMUSG00000025743 | 0.0036063  | -1.828920027 | Sdc3          |
| ENSMUSG00000038576 | 0.00202686 | -1.828974777 | Susd4         |
| ENSMUSG00000075284 | 0.00501029 | -1.830544914 | Wipf1         |
| ENSMUSG00000040797 | 0.01712795 | -1.831081025 | Iqsec3        |
| ENSMUSG00000022211 | 0.0117712  | -1.831225238 | Lrrc16b       |
| ENSMUSG00000101599 | 0.03516646 | -1.833799086 | Gm20342       |
| ENSMUSG00000048899 | 0.02375854 | -1.83733957  | Rimkla        |
| ENSMUSG00000021892 | 0.00708484 | -1.841810281 | Sh3bp5        |
| ENSMUSG00000097545 | 0.03202547 | -1.84334622  | Mir124a-1hg   |
| ENSMUSG00000022332 | 0.01524139 | -1.844859341 | Khdrbs3       |
| ENSMUSG00000063142 | 0.04568435 | -1.847857358 | Kcnma1        |
| ENSMUSG00000021690 | 0.02414939 | -1.848257093 | Jmy           |
| ENSMUSG00000064125 | 0.00685125 | -1.849869832 | Prr36         |
| ENSMUSG00000020431 | 0.03293598 | -1.853807195 | Adcy1         |
| ENSMUSG00000099478 | 0.02746066 | -1.854699716 | Gm28370       |
| ENSMUSG00000040209 | 0.00348793 | -1.856589533 | Zfp704        |
| ENSMUSG00000104389 | 0.02272894 | -1.856678443 | Gm37034       |
| ENSMUSG00000071659 | 0.03553012 | -1.85891588  | Hnrnpul2      |
| ENSMUSG00000025478 | 0.00071753 | -1.861306918 | Dpysl4        |
| ENSMUSG00000033705 | 0.00918785 | -1.863991788 | Stard9        |
| ENSMUSG00000031605 | 0.01096649 | -1.867876475 | Klhl2         |
| ENSMUSG00000035969 | 0.00555141 | -1.868075563 | Rusc2         |
| ENSMUSG00000028468 | 0.02959645 | -1.870577485 | Rgp1          |
| ENSMUSG00000048707 | 0.00357008 | -1.87214097  | Tprn          |
| ENSMUSG00000029510 | 0.01999568 | -1.873157316 | Gpc2          |
| ENSMUSG00000023755 | 0.00705237 | -1.876301186 | Rheb11        |
| ENSMUSG00000059791 | 0.00783601 | -1.876536716 | Nrm           |
| ENSMUSG00000063455 | 0.00583142 | -1.876804952 | D630045J12Rik |
| ENSMUSG00000024174 | 0.02037466 | -1.876960078 | Pot1b         |
| ENSMUSG00000046574 | 0.03704656 | -1.878848121 | Prr12         |
| ENSMUSG00000037855 | 0.0178517  | -1.880045824 | Zfp365        |
| ENSMUSG00000028906 | 0.00795475 | -1.880809568 | Epb41         |
| ENSMUSG00000039470 | 0.00413988 | -1.881524486 | Zdhhc2        |
| ENSMUSG00000032297 | 0.01096649 | -1.882210582 | Celf6         |
| ENSMUSG00000042579 | 0.03591691 | -1.882653651 | 4632404H12Rik |
| ENSMUSG00000024501 | 0.00066549 | -1.885940978 | Dpysl3        |
| ENSMUSG00000027612 | 0.02837062 | -1.887068911 | Mmp24         |
| ENSMUSG00000060206 | 0.02414092 | -1.887085878 | Zfp462        |
| ENSMUSG00000025161 | 0.00126758 | -1.887909218 | Slc16a3       |
| ENSMUSG00000032531 | 0.02846861 | -1.889198335 | Amotl2        |
| ENSMUSG00000026447 | 0.01953262 | -1.889480053 | Pik3c2b       |
| ENSMUSG00000020181 | 0.00797598 | -1.889522356 | Nav3          |
| ENSMUSG00000030401 | 0.00355916 | -1.891313406 | Rtn2          |
| ENSMUSG00000020483 | 0.00665252 | -1.892467592 | Dynll2        |
| ENSMUSG00000041642 | 0.00142489 | -1.893154089 | Kif21b        |
| ENSMUSG00000021730 | 0.04230715 | -1.893654213 | Hcn1          |
| ENSMUSG00000031028 | 0.01498165 | -1.900030405 | Tub           |
| ENSMUSG00000034891 | 0.02194771 | -1.900522827 | Sncb          |
| ENSMUSG00000001065 | 0.0019476  | -1.902303799 | Zfp276        |
| ENSMUSG00000033615 | 0.00122666 | -1.903279003 | Cplx1         |
| ENSMUSG00000052889 | 0.00689121 | -1.904272927 | Prkcb         |
| ENSMUSG00000067889 | 0.00392425 | -1.90474775  | Sptbn2        |
| ENSMUSG00000051065 | 0.0041561  | -1.91181052  | Mb21d2        |
| ENSMUSG00000042751 | 0.00319626 | -1.913417126 | Nmnat2        |
| ENSMUSG00000026955 | 0.00205647 | -1.915994359 | Sapcd2        |
| ENSMUSG00000020354 | 0.03685737 | -1.919788998 | Sgcd          |
| ENSMUSG00000050914 | 0.00598856 | -1.921184979 | Ankrd37       |
| ENSMUSG00000063434 | 0.02923802 | -1.923735765 | Sorcs3        |
| ENSMUSG00000049148 | 0.01117809 | -1.923765126 | Plcx3         |
| ENSMUSG00000025612 | 0.00689121 | -1.924868509 | Bach1         |

|                     |            |              |               |
|---------------------|------------|--------------|---------------|
| ENSMUSG00000060882  | 0.00249109 | -1.925371157 | Kcnd2         |
| ENSMUSG00000005672  | 0.03060077 | -1.926688064 | Kit           |
| ENSMUSG00000009216  | 0.02314144 | -1.929985832 | Fam163b       |
| ENSMUSG00000030350  | 0.02991228 | -1.930061899 | Prmt8         |
| ENSMUSG000000100826 | 0.01649236 | -1.930114734 | Snhg14        |
| ENSMUSG00000024042  | 0.01176963 | -1.93142603  | Sik1          |
| ENSMUSG00000025876  | 0.01509473 | -1.932081218 | Unc5a         |
| ENSMUSG00000015149  | 0.0004444  | -1.93268407  | Sirt2         |
| ENSMUSG00000030351  | 0.02494615 | -1.934234796 | Tspan11       |
| ENSMUSG00000054555  | 0.01745585 | -1.934868236 | Adam12        |
| ENSMUSG00000020812  | 0.00880098 | -1.937159184 | 1810032O08Rik |
| ENSMUSG00000062995  | 0.00385188 | -1.937480855 | lca1          |
| ENSMUSG00000024968  | 0.04043161 | -1.943178424 | Rcor2         |
| ENSMUSG00000013033  | 0.00828958 | -1.946300543 | Adgr1         |
| ENSMUSG00000029219  | 0.01318629 | -1.953212543 | Slc10a4       |
| ENSMUSG00000058297  | 0.00492948 | -1.954012662 | Spock2        |
| ENSMUSG00000052949  | 0.04600273 | -1.954111246 | Rnf157        |
| ENSMUSG00000074873  | 0.0462589  | -1.957625709 | Al606181      |
| ENSMUSG00000039913  | 0.00326378 | -1.958081483 | Pak7          |
| ENSMUSG00000039661  | 0.00562894 | -1.959809675 | Dusp26        |
| ENSMUSG00000068966  | 0.01411245 | -1.960517811 | Zbtb34        |
| ENSMUSG00000040511  | 0.01562252 | -1.96322837  | Pvr           |
| ENSMUSG00000001313  | 0.00506292 | -1.964174961 | Rnd2          |
| ENSMUSG00000086370  | 0.0317916  | -1.970217388 | Ftx           |
| ENSMUSG00000025892  | 0.01250087 | -1.971992143 | Gria4         |
| ENSMUSG00000089726  | 0.04221989 | -1.973045282 | Mir17hg       |
| ENSMUSG00000026014  | 0.00866271 | -1.978282554 | Raph1         |
| ENSMUSG00000097929  | 0.03553012 | -1.978964707 | Tunar         |
| ENSMUSG00000043439  | 0.00563236 | -1.979667468 | E130012A19Rik |
| ENSMUSG00000020241  | 0.00530593 | -1.980728449 | Col6a2        |
| ENSMUSG00000030283  | 0.04883723 | -1.98084855  | St8sia1       |
| ENSMUSG00000097769  | 0.02267807 | -1.982422918 | Snhg4         |
| ENSMUSG00000018537  | 0.02886177 | -1.983179173 | Pcgf2         |
| ENSMUSG00000032249  | 0.03222193 | -1.984455221 | Anp32a        |
| ENSMUSG00000025468  | 0.01090348 | -1.985079747 | Caly          |
| ENSMUSG00000060371  | 0.02423965 | -1.986142028 | Caln1         |
| ENSMUSG00000040721  | 0.0134251  | -1.986352569 | Zfhx2         |
| ENSMUSG00000046178  | 0.00392425 | -1.986997872 | Nxph1         |
| ENSMUSG00000079020  | 0.00466864 | -1.990680136 | Slc45a4       |
| ENSMUSG00000029033  | 0.00040649 | -1.991474298 | Acap3         |
| ENSMUSG00000053129  | 0.00105856 | -1.992020756 | Gsx1          |
| ENSMUSG00000032087  | 0.02001624 | -1.992572944 | Dscaml1       |
| ENSMUSG00000018474  | 0.00307486 | -1.993536074 | Chd3          |
| ENSMUSG000000104597 | 0.03820727 | -1.995012723 | B230334C09Rik |
| ENSMUSG00000017386  | 0.00066549 | -1.995903577 | Traf4         |
| ENSMUSG00000024776  | 0.00332524 | -1.997532687 | Stambpl1      |
| ENSMUSG00000026156  | 0.01071351 | -1.998583312 | B3gat2        |
| ENSMUSG00000092203  | 0.00862775 | -1.999728256 | 1110038B12Rik |
| ENSMUSG00000028655  | 0.00100138 | -2.001351486 | Mfsd2a        |
| ENSMUSG00000021375  | 0.00451567 | -2.003153086 | Kif13a        |
| ENSMUSG00000075478  | 0.01557891 | -2.007815296 | Slitrk1       |
| ENSMUSG00000070348  | 0.001874   | -2.009947651 | Ccnd1         |
| ENSMUSG00000039678  | 0.03494508 | -2.01034267  | Tbc1d13       |
| ENSMUSG00000033161  | 0.00287794 | -2.013210519 | Atp1a1        |
| ENSMUSG00000035551  | 0.01704468 | -2.01584139  | Igfbpl1       |
| ENSMUSG00000026959  | 0.00677734 | -2.016763646 | Grin1         |
| ENSMUSG00000021700  | 0.01523335 | -2.019143449 | Rab3c         |
| ENSMUSG00000044365  | 0.00762218 | -2.019383645 | Cxxc4         |
| ENSMUSG00000041112  | 0.00219458 | -2.019948558 | Elmo1         |
| ENSMUSG00000025558  | 0.01433859 | -2.021069254 | Dock9         |
| ENSMUSG00000041073  | 0.00322412 | -2.021768778 | Nacad         |
| ENSMUSG00000034336  | 0.01102095 | -2.022086623 | Ina           |
| ENSMUSG00000042589  | 0.00156611 | -2.025374777 | Cux2          |
| ENSMUSG00000021198  | 0.00685125 | -2.027630976 | Unc79         |
| ENSMUSG00000025592  | 0.01062161 | -2.029002935 | Dach2         |
| ENSMUSG00000030584  | 0.00462196 | -2.029462341 | Dpf1          |
| ENSMUSG00000035621  | 0.011359   | -2.030984364 | Midn          |
| ENSMUSG00000044352  | 0.04998263 | -2.031334021 | Sowaha        |
| ENSMUSG00000047261  | 0.001874   | -2.033566515 | Gap43         |
| ENSMUSG00000056612  | 0.02764364 | -2.03382563  | Ppp1r14b      |
| ENSMUSG00000051323  | 0.00795475 | -2.035510969 | Pcdh19        |
| ENSMUSG00000034171  | 0.00393804 | -2.036038259 | Faah          |
| ENSMUSG00000065126  | 0.03961972 | -2.036498292 | Snord104      |
| ENSMUSG00000048154  | 0.00561084 | -2.036766067 | Kmt2d         |
| ENSMUSG00000063873  | 0.01983425 | -2.036772036 | Slc24a3       |

|                     |            |              |               |
|---------------------|------------|--------------|---------------|
| ENSMUSG00000020810  | 0.0205984  | -2.037725878 | Cygb          |
| ENSMUSG00000032135  | 0.01633839 | -2.039264319 | Mcam          |
| ENSMUSG00000021061  | 0.03038664 | -2.042087592 | Sptb          |
| ENSMUSG00000008496  | 0.04614251 | -2.045692093 | Pou2f2        |
| ENSMUSG000000074578 | 0.01467366 | -2.04615662  | Zfas1         |
| ENSMUSG00000006403  | 0.00382105 | -2.047696185 | Adamts4       |
| ENSMUSG000000059921 | 0.00277458 | -2.049461821 | Unc5c         |
| ENSMUSG00000003500  | 0.00145736 | -2.051402626 | Impdh1        |
| ENSMUSG00000101609  | 0.01171148 | -2.051575848 | Kcnq10t1      |
| ENSMUSG000000070583 | 0.04743766 | -2.051796516 | Fv1           |
| ENSMUSG00000021411  | 0.00348081 | -2.053418703 | Pxdc1         |
| ENSMUSG000000045268 | 0.03922843 | -2.053444961 | Zfp691        |
| ENSMUSG00000066800  | 0.00795475 | -2.054706453 | Rnasel        |
| ENSMUSG00000045657  | 0.011359   | -2.05628032  | Pcdhb10       |
| ENSMUSG00000090698  | 0.00096426 | -2.059282462 | Apold1        |
| ENSMUSG00000039976  | 0.00619074 | -2.063091687 | Tbc1d16       |
| ENSMUSG000000061143 | 0.03456989 | -2.064330589 | Maml3         |
| ENSMUSG00000026837  | 0.00509793 | -2.066932041 | Col5a1        |
| ENSMUSG00000017740  | 0.02769985 | -2.068200063 | Slc12a5       |
| ENSMUSG00000029053  | 0.00113203 | -2.076224851 | Prkcz         |
| ENSMUSG00000022840  | 0.01088098 | -2.079758939 | Adcy5         |
| ENSMUSG00000062209  | 0.00295233 | -2.08092936  | Erbp4         |
| ENSMUSG00000032589  | 0.02781703 | -2.082892334 | Bsn           |
| ENSMUSG00000033061  | 0.00855538 | -2.082896784 | Resp18        |
| ENSMUSG00000003410  | 0.00376364 | -2.083958721 | Elavl3        |
| ENSMUSG000000047428 | 0.02645258 | -2.084162829 | Dlk2          |
| ENSMUSG00000030707  | 0.00218929 | -2.085039387 | Coro1a        |
| ENSMUSG000000035828 | 0.00146895 | -2.087049572 | Pim3          |
| ENSMUSG00000040570  | 0.0034695  | -2.087842312 | Rundc3b       |
| ENSMUSG00000056602  | 0.00620711 | -2.092431848 | Fry           |
| ENSMUSG000000040972 | 0.001669   | -2.102182869 | Igsf21        |
| ENSMUSG00000005534  | 0.00325982 | -2.102317954 | Insr          |
| ENSMUSG000000031802 | 0.02426921 | -2.103548727 | Phxr4         |
| ENSMUSG00000032291  | 0.01096649 | -2.104864062 | Crabp1        |
| ENSMUSG00000071984  | 0.01425404 | -2.111805109 | Fndc1         |
| ENSMUSG000000073164 | 0.04528502 | -2.112513553 | 2410018L13Rik |
| ENSMUSG000000041774 | 0.01672434 | -2.119362006 | Ydjc          |
| ENSMUSG000000022769 | 0.00448939 | -2.121634697 | Sdf211        |
| ENSMUSG00000004633  | 0.00307366 | -2.121638653 | Chn2          |
| ENSMUSG00000037946  | 0.02401381 | -2.121844442 | Fgd3          |
| ENSMUSG000000056895 | 0.00778061 | -2.126885237 | Hist3h2ba     |
| ENSMUSG00000016181  | 0.00335931 | -2.12831216  | Diexf         |
| ENSMUSG000000034656 | 0.01411245 | -2.135789983 | Cacna1a       |
| ENSMUSG000000099423 | 0.03600915 | -2.137037965 | Gm17826       |
| ENSMUSG000000036242 | 0.013586   | -2.137045577 | 3632451O06Rik |
| ENSMUSG00000018865  | 0.00077314 | -2.137064893 | Sult4a1       |
| ENSMUSG00000051359  | 0.00080199 | -2.137725436 | Ncald         |
| ENSMUSG00000021699  | 0.00687682 | -2.139608181 | Pde4d         |
| ENSMUSG000000052581 | 0.01407668 | -2.140211684 | Lrrtm4        |
| ENSMUSG00000029228  | 0.00474065 | -2.141328524 | Lnx1          |
| ENSMUSG000000039257 | 0.00784871 | -2.144522344 | Vstm2b        |
| ENSMUSG000000058153 | 0.01096649 | -2.146197621 | Sez6l         |
| ENSMUSG000000050587 | 0.00686846 | -2.147737998 | Lrrc4c        |
| ENSMUSG000000029816 | 0.0084246  | -2.149162249 | Gpnmb         |
| ENSMUSG00000024172  | 0.01826008 | -2.151208761 | St6gal2       |
| ENSMUSG000000095123 | 0.0251774  | -2.151781539 | Gm21781       |
| ENSMUSG000000038291 | 0.00564044 | -2.156955652 | Snx25         |
| ENSMUSG000000041205 | 0.00793891 | -2.161480732 | Map6d1        |
| ENSMUSG000000031709 | 0.00323251 | -2.16483044  | Tbc1d9        |
| ENSMUSG00000047712  | 0.00068656 | -2.167377841 | Ust           |
| ENSMUSG00000020272  | 0.04534381 | -2.169629427 | Stk10         |
| ENSMUSG000000032269 | 0.00362023 | -2.173807648 | Htr3a         |
| ENSMUSG000000036067 | 0.00392732 | -2.17750596  | Slc2a6        |
| ENSMUSG000000055485 | 0.00714834 | -2.177646969 | Soga1         |
| ENSMUSG000000023341 | 0.01024341 | -2.178649521 | Mx2           |
| ENSMUSG00000042662  | 0.01096649 | -2.179456861 | Dusp15        |
| ENSMUSG000000033581 | 0.00263041 | -2.180100682 | Igf2bp2       |
| ENSMUSG000000045136 | 0.00071574 | -2.18503883  | Tubb2b        |
| ENSMUSG000000039117 | 0.02423189 | -2.188040436 | Taf4          |
| ENSMUSG000000010505 | 0.00323251 | -2.191018219 | Myt1          |
| ENSMUSG00000021703  | 0.03343263 | -2.191770949 | Serinc5       |
| ENSMUSG000000034612 | 0.0019174  | -2.191905025 | Chst11        |
| ENSMUSG00000045672  | 0.03203791 | -2.192561045 | Col27a1       |
| ENSMUSG00000046613  | 0.02411735 | -2.196929266 | Vwa5b2        |
| ENSMUSG00000019831  | 0.00091123 | -2.198709372 | Wasf1         |

|                     |            |              |               |
|---------------------|------------|--------------|---------------|
| ENSMUSG00000039844  | 0.00895248 | -2.199016271 | Rapgef1       |
| ENSMUSG00000041852  | 0.00796419 | -2.201248759 | Tcf20         |
| ENSMUSG00000022791  | 0.00086449 | -2.201803502 | Tnk2          |
| ENSMUSG00000037224  | 0.02311776 | -2.202213152 | Zfyve28       |
| ENSMUSG000000109554 | 0.03716966 | -2.202498843 | RP24-274B19.1 |
| ENSMUSG00000067199  | 0.01876538 | -2.210866446 | Frat1         |
| ENSMUSG00000045994  | 0.00265264 | -2.211679922 | B3gat1        |
| ENSMUSG00000099964  | 0.02703484 | -2.216143076 | Gm29514       |
| ENSMUSG00000045991  | 0.03425628 | -2.218193556 | Onecut2       |
| ENSMUSG00000022346  | 0.00040649 | -2.219912252 | Myc           |
| ENSMUSG00000046607  | 0.03912506 | -2.225010433 | Hrk           |
| ENSMUSG00000097974  | 0.032633   | -2.229031897 | Gm10605       |
| ENSMUSG00000052981  | 0.00466864 | -2.231426717 | Ube2ql1       |
| ENSMUSG0000006782   | 8.3648E-05 | -2.232623759 | Cnp           |
| ENSMUSG00000039860  | 0.02482302 | -2.233602323 | Srrm3         |
| ENSMUSG00000038400  | 0.01508593 | -2.235105243 | Pmepa1        |
| ENSMUSG00000051790  | 0.02606456 | -2.235671466 | Nlgn2         |
| ENSMUSG00000039108  | 0.00768853 | -2.240829536 | Lsm14b        |
| ENSMUSG00000030411  | 0.02656108 | -2.243124612 | Nova2         |
| ENSMUSG00000034324  | 0.04148202 | -2.248378853 | Tmem132c      |
| ENSMUSG00000021696  | 0.00339108 | -2.260948262 | Elovl7        |
| ENSMUSG00000047787  | 0.00807164 | -2.262135293 | Flrt1         |
| ENSMUSG00000023473  | 0.0028921  | -2.263287382 | Celsr3        |
| ENSMUSG00000042066  | 0.00235269 | -2.265002039 | Tmcc2         |
| ENSMUSG00000020312  | 0.00821173 | -2.273877858 | Shc2          |
| ENSMUSG00000046160  | 0.00019118 | -2.280891314 | Olig1         |
| ENSMUSG00000038608  | 0.00339108 | -2.290009049 | Dock10        |
| ENSMUSG00000039741  | 0.01096649 | -2.293068092 | Bahcc1        |
| ENSMUSG00000037771  | 0.00688789 | -2.296613952 | Slc32a1       |
| ENSMUSG00000020340  | 0.00427448 | -2.296654026 | Cytip2        |
| ENSMUSG00000015981  | 0.0411698  | -2.29829294  | Stk32c        |
| ENSMUSG00000043843  | 0.00688789 | -2.301583532 | Tmem145       |
| ENSMUSG00000021047  | 0.00188956 | -2.304674259 | Nova1         |
| ENSMUSG00000018476  | 0.01625976 | -2.305073434 | Kdm6b         |
| ENSMUSG00000043336  | 0.02512885 | -2.308704747 | Filip1l       |
| ENSMUSG00000018387  | 0.0176357  | -2.317966716 | Shroom1       |
| ENSMUSG00000034958  | 0.00033801 | -2.319162655 | Atcay         |
| ENSMUSG00000026058  | 0.00116923 | -2.32621383  | Khdrbs2       |
| ENSMUSG00000034206  | 0.00938757 | -2.329839764 | Polq          |
| ENSMUSG00000026458  | 0.00938757 | -2.339074906 | Ppfia4        |
| ENSMUSG00000073433  | 0.00938757 | -2.342314469 | Arhgdig       |
| ENSMUSG00000030500  | 0.01179285 | -2.343257893 | Slc17a6       |
| ENSMUSG00000035390  | 0.01581481 | -2.344937068 | Brsk1         |
| ENSMUSG00000064329  | 0.02769985 | -2.360024203 | Scn1a         |
| ENSMUSG00000091475  | 0.00031923 | -2.361700969 | 2810468N07Rik |
| ENSMUSG00000025318  | 0.00068656 | -2.363723005 | Jph3          |
| ENSMUSG00000056158  | 0.02891573 | -2.375981548 | Car10         |
| ENSMUSG00000026147  | 0.00211085 | -2.383633633 | Col9a1        |
| ENSMUSG00000021263  | 0.02781703 | -2.384471268 | Degs2         |
| ENSMUSG00000051062  | 0.02215048 | -2.384676238 | Fbll1         |
| ENSMUSG00000006218  | 0.02423843 | -2.38484576  | Fam131c       |
| ENSMUSG00000044349  | 0.00261392 | -2.392189023 | Snhg11        |
| ENSMUSG00000027316  | 0.01620991 | -2.395481884 | Gfra4         |
| ENSMUSG00000025375  | 0.00040649 | -2.399512429 | Aatk          |
| ENSMUSG00000067028  | 0.01616315 | -2.399940232 | Cntnap5b      |
| ENSMUSG00000034771  | 0.00067425 | -2.4005524   | Tle2          |
| ENSMUSG00000029608  | 0.00373229 | -2.403891004 | Rph3a         |
| ENSMUSG00000010086  | 0.00369366 | -2.404765747 | Rnf112        |
| ENSMUSG00000016346  | 0.00357008 | -2.405869098 | Kcnq2         |
| ENSMUSG00000033805  | 0.04126953 | -2.408198041 | Ephx4         |
| ENSMUSG00000027419  | 0.00276459 | -2.408724638 | Pcsk2         |
| ENSMUSG00000025429  | 0.03053202 | -2.409475051 | Pstpip2       |
| ENSMUSG00000016995  | 0.00100266 | -2.413130407 | Matn4         |
| ENSMUSG00000002006  | 0.01456621 | -2.414621865 | Pdzd4         |
| ENSMUSG00000097971  | 0.00144927 | -2.416989511 | Gm26917       |
| ENSMUSG00000022425  | 0.00345831 | -2.420858118 | Enpp2         |
| ENSMUSG00000025010  | 0.00555702 | -2.426564067 | Ccnj          |
| ENSMUSG00000022353  | 0.00139626 | -2.427956858 | Mtss1         |
| ENSMUSG00000033342  | 0.00248102 | -2.429315902 | Plppr5        |
| ENSMUSG00000028351  | 0.00091505 | -2.429638914 | Brinp1        |
| ENSMUSG00000066687  | 0.00361109 | -2.433047779 | Zbtb16        |
| ENSMUSG00000037664  | 0.00248102 | -2.434936401 | Cdkn1c        |
| ENSMUSG00000070366  | 0.00218658 | -2.439136525 | Plpp4         |
| ENSMUSG00000000531  | 0.01419251 | -2.444781804 | Grasp         |
| ENSMUSG00000079157  | 0.0043124  | -2.445400942 | Fam155a       |

|                    |            |              |               |
|--------------------|------------|--------------|---------------|
| ENSMUSG00000001435 | 0.00224911 | -2.446777222 | Col18a1       |
| ENSMUSG00000097772 | 0.04883723 | -2.448291445 | 5430416N02Rik |
| ENSMUSG00000057315 | 0.03059861 | -2.448355166 | Arhgap24      |
| ENSMUSG00000000948 | 0.01742579 | -2.449067083 | Gm38393       |
| ENSMUSG00000047507 | 0.0086231  | -2.451314967 | Baiap3        |
| ENSMUSG00000021337 | 0.02778727 | -2.453255498 | Scgn          |
| ENSMUSG00000046321 | 0.03276344 | -2.460694328 | Hs3st2        |
| ENSMUSG00000062760 | 0.00086449 | -2.463554671 | 1810041L15Rik |
| ENSMUSG00000037872 | 0.03329512 | -2.476335604 | Ackr1         |
| ENSMUSG00000021108 | 0.04566693 | -2.47949055  | Prkch         |
| ENSMUSG00000028713 | 0.01254194 | -2.481777318 | Cyp4b1        |
| ENSMUSG00000050711 | 0.00041062 | -2.484705664 | Scg2          |
| ENSMUSG00000041930 | 0.00409912 | -2.487135377 | Fam222a       |
| ENSMUSG00000029055 | 0.03096322 | -2.496063175 | Plch2         |
| ENSMUSG00000001021 | 0.00330073 | -2.499761355 | S100a3        |
| ENSMUSG00000047897 | 0.03411436 | -2.512595811 | Ripply2       |
| ENSMUSG00000032327 | 0.02732248 | -2.514594744 | Stra6         |
| ENSMUSG00000061702 | 0.01832238 | -2.520644218 | Tmem91        |
| ENSMUSG00000031654 | 0.02250358 | -2.523784212 | Cbln1         |
| ENSMUSG00000044026 | 0.02068171 | -2.529794339 | Slc35g1       |
| ENSMUSG00000036907 | 0.04374477 | -2.532492358 | C1ql2         |
| ENSMUSG00000020182 | 0.00357691 | -2.534719924 | Ddc           |
| ENSMUSG00000023953 | 0.02850745 | -2.535001425 | Polh          |
| ENSMUSG00000110656 | 0.02262393 | -2.535585925 | RP23-354I24.7 |
| ENSMUSG00000005338 | 0.01162396 | -2.535739808 | Cadm3         |
| ENSMUSG00000058589 | 0.00033801 | -2.541900397 | Anks1b        |
| ENSMUSG00000036913 | 0.00067628 | -2.543702913 | Trim67        |
| ENSMUSG00000052629 | 0.02827464 | -2.555288105 | Gm9885        |
| ENSMUSG00000016487 | 0.00796419 | -2.559718651 | Ppfibp1       |
| ENSMUSG00000075334 | 0.00066236 | -2.5713368   | Rprm          |
| ENSMUSG00000103899 | 0.03022858 | -2.573037848 | Gm37940       |
| ENSMUSG00000106944 | 0.01647225 | -2.576146836 | Gm43843       |
| ENSMUSG00000022055 | 0.01132469 | -2.579915757 | Nefl          |
| ENSMUSG00000056758 | 0.04915041 | -2.580456998 | Hmga2         |
| ENSMUSG00000097755 | 0.03711628 | -2.589372703 | 2010110K18Rik |
| ENSMUSG00000045083 | 0.00101359 | -2.595628071 | Lingo2        |
| ENSMUSG00000062257 | 0.00040084 | -2.598378269 | Opcml         |
| ENSMUSG00000036185 | 0.04055141 | -2.598486906 | Sapcd1        |
| ENSMUSG00000091754 | 0.03082084 | -2.601239624 | Gm3636        |
| ENSMUSG00000032035 | 0.00272778 | -2.609360072 | Ets1          |
| ENSMUSG00000032268 | 0.00787326 | -2.611494993 | Tmprss5       |
| ENSMUSG00000061451 | 0.00094739 | -2.616830382 | Tmem151a      |
| ENSMUSG00000049612 | 0.00023305 | -2.623145976 | Omg           |
| ENSMUSG00000039831 | 0.03229811 | -2.627532353 | Arhgap29      |
| ENSMUSG00000073538 | 0.02329753 | -2.631174714 | E330020D12Rik |
| ENSMUSG00000019970 | 0.00015855 | -2.635988663 | Sgk1          |
| ENSMUSG00000013415 | 0.0493856  | -2.636212233 | Igf2bp1       |
| ENSMUSG00000036206 | 0.00015537 | -2.640152518 | Sh3bp4        |
| ENSMUSG00000041670 | 0.00357008 | -2.64094882  | Rims1         |
| ENSMUSG00000054459 | 0.00249109 | -2.645914029 | Vsnl1         |
| ENSMUSG00000028082 | 0.00041045 | -2.653779219 | Sh3d19        |
| ENSMUSG00000042529 | 0.02283965 | -2.656970095 | Kcnj12        |
| ENSMUSG00000030329 | 0.00211771 | -2.658108744 | Pianp         |
| ENSMUSG00000017400 | 0.03949617 | -2.675033836 | Stac2         |
| ENSMUSG00000034758 | 0.00256915 | -2.67543631  | Tle6          |
| ENSMUSG00000026442 | 0.00091123 | -2.679438632 | Nfasc         |
| ENSMUSG00000038738 | 0.00803724 | -2.690112092 | Shank1        |
| ENSMUSG00000024176 | 0.00033801 | -2.697012386 | Sox8          |
| ENSMUSG00000004113 | 0.00357008 | -2.70279118  | Cacna1b       |
| ENSMUSG00000105076 | 0.00386411 | -2.703370519 | A930003O13Rik |
| ENSMUSG00000036815 | 0.00870531 | -2.713932356 | Dpp10         |
| ENSMUSG00000097248 | 0.00208953 | -2.718684169 | Gm2694        |
| ENSMUSG00000045903 | 0.00605047 | -2.730492676 | Npas4         |
| ENSMUSG00000002797 | 0.00073927 | -2.739915108 | Ggct          |
| ENSMUSG00000072847 | 0.01826008 | -2.743144478 | A530017D24Rik |
| ENSMUSG00000035431 | 0.02958307 | -2.74846337  | Sstr1         |
| ENSMUSG00000039452 | 0.00040084 | -2.770108636 | Snx22         |
| ENSMUSG00000027368 | 0.04443905 | -2.77824417  | Dusp2         |
| ENSMUSG00000028385 | 0.00092255 | -2.78059793  | Snx30         |
| ENSMUSG00000060969 | 0.0259427  | -2.789138361 | Irx1          |
| ENSMUSG00000043441 | 0.0030225  | -2.789285506 | Gpr149        |
| ENSMUSG00000061578 | 0.03220887 | -2.796906119 | Ksr2          |
| ENSMUSG00000086503 | 0.00106845 | -2.796932976 | Xist          |
| ENSMUSG00000034330 | 0.001669   | -2.81065957  | Plcg2         |
| ENSMUSG00000076439 | 0.04662594 | -2.813757533 | Mog           |



|                    |            |              |               |
|--------------------|------------|--------------|---------------|
| ENSMUSG00000043068 | 0.01268313 | -2.818324694 | Fam89a        |
| ENSMUSG00000023017 | 0.00209924 | -2.822604295 | Asic1         |
| ENSMUSG00000021194 | 0.00036934 | -2.826673805 | Chga          |
| ENSMUSG00000030450 | 0.03095279 | -2.827372539 | Oca2          |
| ENSMUSG00000029231 | 0.0041561  | -2.830288373 | Pdgfra        |
| ENSMUSG00000048304 | 0.00128622 | -2.832131139 | Slitrk3       |
| ENSMUSG00000097109 | 0.03935635 | -2.832813148 | Gm26580       |
| ENSMUSG00000105753 | 0.01634392 | -2.834972652 | Gm43847       |
| ENSMUSG00000025912 | 0.00857514 | -2.849672313 | Mybl1         |
| ENSMUSG00000041773 | 0.01333067 | -2.85336954  | Enc1          |
| ENSMUSG00000022263 | 0.0005587  | -2.868043188 | Trio          |
| ENSMUSG00000034265 | 0.00095611 | -2.871150238 | Zdhhc14       |
| ENSMUSG00000050830 | 0.00589724 | -2.886457717 | Vwc2          |
| ENSMUSG00000050321 | 0.00086449 | -2.904686896 | Neto1         |
| ENSMUSG00000024672 | 0.01767902 | -2.911071153 | Ms4a7         |
| ENSMUSG00000039830 | 0.00795475 | -2.916220243 | Olig2         |
| ENSMUSG00000050295 | 0.0479567  | -2.921227208 | Foxc1         |
| ENSMUSG00000089941 | 0.00791052 | -2.931325081 | Gm16168       |
| ENSMUSG00000031952 | 0.01331504 | -2.94165875  | Chst5         |
| ENSMUSG00000035131 | 0.00071574 | -2.948054749 | Brinp3        |
| ENSMUSG0000007594  | 0.02214022 | -2.953029808 | Hapln4        |
| ENSMUSG0000001985  | 0.00248102 | -2.967601179 | Grik3         |
| ENSMUSG00000055022 | 0.00373119 | -2.980464049 | Cntn1         |
| ENSMUSG00000022096 | 0.00454929 | -2.989649341 | Hr            |
| ENSMUSG00000056481 | 0.00487832 | -2.994181445 | Cd248         |
| ENSMUSG00000062591 | 2.7812E-05 | -3.008673023 | Tubb4a        |
| ENSMUSG00000033007 | 0.00256915 | -3.015146682 | Asic4         |
| ENSMUSG00000097823 | 0.03074773 | -3.02333453  | Gm16701       |
| ENSMUSG00000069516 | 0.00033801 | -3.028594518 | Lyz2          |
| ENSMUSG00000022231 | 0.00040649 | -3.028660854 | Sema5a        |
| ENSMUSG00000042195 | 0.00237976 | -3.030670886 | Slc35f2       |
| ENSMUSG00000002799 | 0.01815307 | -3.035119208 | Jag2          |
| ENSMUSG00000001988 | 0.00688988 | -3.04358013  | Npas1         |
| ENSMUSG00000062044 | 0.02276075 | -3.045240521 | Lmtk3         |
| ENSMUSG00000025909 | 0.00514272 | -3.045280305 | Sntg1         |
| ENSMUSG00000048537 | 0.00019681 | -3.059158631 | Phldb1        |
| ENSMUSG00000021662 | 0.00494935 | -3.059757698 | Arhgef28      |
| ENSMUSG00000087365 | 0.00162078 | -3.060967465 | C430049B03Rik |
| ENSMUSG00000002190 | 0.00452302 | -3.078303871 | Clgn          |
| ENSMUSG00000031383 | 0.02453443 | -3.08350427  | Dusp9         |
| ENSMUSG00000022311 | 0.00091123 | -3.089304882 | Csmc3         |
| ENSMUSG00000106826 | 0.00904787 | -3.096021218 | Gm42583       |
| ENSMUSG00000030638 | 0.00051868 | -3.098365662 | Sh3gl3        |
| ENSMUSG00000032911 | 0.00100695 | -3.110403771 | Cspg4         |
| ENSMUSG00000064225 | 0.01625976 | -3.115923646 | Paqr9         |
| ENSMUSG00000029999 | 0.001669   | -3.117187131 | Tgfa          |
| ENSMUSG00000043460 | 0.00022265 | -3.11903175  | Elfn2         |
| ENSMUSG00000069920 | 0.00568552 | -3.134623262 | B3gnt9        |
| ENSMUSG00000047747 | 0.02945753 | -3.139505742 | Rnf150        |
| ENSMUSG00000040447 | 0.00202661 | -3.150945639 | Spns2         |
| ENSMUSG00000038704 | 0.03866454 | -3.15499228  | Aspdh         |
| ENSMUSG00000003436 | 0.01004103 | -3.177986441 | Dll3          |
| ENSMUSG00000100147 | 0.0136601  | -3.18019935  | 1700047M11Rik |
| ENSMUSG00000026778 | 0.00022265 | -3.18621694  | Prkcq         |
| ENSMUSG00000032773 | 0.002961   | -3.187193976 | Chrm1         |
| ENSMUSG00000068615 | 0.00787326 | -3.192956963 | Gjd2          |
| ENSMUSG00000048988 | 0.00040084 | -3.195664417 | Elfn1         |
| ENSMUSG00000039954 | 0.00074892 | -3.207194578 | Stk32a        |
| ENSMUSG00000090358 | 0.04483784 | -3.211009527 | Gm2822        |
| ENSMUSG00000043753 | 0.02924996 | -3.221118956 | Dmrta1        |
| ENSMUSG00000029123 | 0.01263178 | -3.228594585 | Stk32b        |
| ENSMUSG00000030075 | 0.01318721 | -3.235301291 | Cntn3         |
| ENSMUSG00000043099 | 0.01340619 | -3.236924485 | Hic1          |
| ENSMUSG00000024990 | 0.0178517  | -3.241538003 | Rbp4          |
| ENSMUSG00000086171 | 0.00441784 | -3.243546728 | Pcsk2os1      |
| ENSMUSG00000030287 | 0.00022265 | -3.245815276 | Itpr2         |
| ENSMUSG00000075555 | 0.02404724 | -3.247870036 | Gm10863       |
| ENSMUSG00000027434 | 0.00040084 | -3.248377994 | Nkx2-2        |
| ENSMUSG00000030220 | 0.01767902 | -3.260899901 | Arhgdib       |
| ENSMUSG00000066720 | 0.00715111 | -3.262008934 | Cldn9         |
| ENSMUSG00000026109 | 4.0133E-05 | -3.267401165 | Tmeff2        |
| ENSMUSG00000020701 | 0.00514272 | -3.283317825 | Tmem132e      |
| ENSMUSG00000031104 | 0.0006278  | -3.294294521 | Rab33a        |
| ENSMUSG00000104378 | 0.01653246 | -3.297948701 | Gm37510       |
| ENSMUSG00000105726 | 0.03271116 | -3.325803564 | Gm42443       |

|                     |            |              |               |
|---------------------|------------|--------------|---------------|
| ENSMUSG00000031380  | 0.00508501 | -3.327156328 | Vegfd         |
| ENSMUSG00000069072  | 0.00283352 | -3.333315194 | Slc7a14       |
| ENSMUSG00000040265  | 0.00011041 | -3.334781467 | Dnm3          |
| ENSMUSG00000035226  | 0.02094303 | -3.335457007 | Rims4         |
| ENSMUSG00000027082  | 0.00665252 | -3.338593543 | Tfpi          |
| ENSMUSG00000041605  | 0.00017004 | -3.356284048 | 5730559C18Rik |
| ENSMUSG00000041607  | 9.2733E-06 | -3.376832564 | Mbp           |
| ENSMUSG00000046523  | 0.00058965 | -3.377094814 | Kctd4         |
| ENSMUSG00000034177  | 0.01171148 | -3.39088615  | Rnf43         |
| ENSMUSG000000104852 | 0.01579326 | -3.393061796 | Gm43201       |
| ENSMUSG00000040254  | 0.01874607 | -3.403006585 | Sema3d        |
| ENSMUSG00000060988  | 0.00688988 | -3.412982341 | Galnt13       |
| ENSMUSG00000087230  | 0.00376364 | -3.436047532 | Mroh3         |
| ENSMUSG00000008136  | 0.00022294 | -3.441035855 | Fhl2          |
| ENSMUSG00000036545  | 0.0104998  | -3.442580385 | Adamts2       |
| ENSMUSG00000053550  | 0.001669   | -3.486466959 | Shisa7        |
| ENSMUSG000000106757 | 0.03891515 | -3.532440708 | Gm43482       |
| ENSMUSG00000032854  | 0.00107355 | -3.537725505 | Ugt8a         |
| ENSMUSG00000048782  | 0.02000051 | -3.537933051 | Insc          |
| ENSMUSG00000007480  | 0.03082633 | -3.54958264  | Mc5r          |
| ENSMUSG00000031425  | 2.3795E-05 | -3.55478616  | Plp1          |
| ENSMUSG00000046922  | 0.04135785 | -3.568991756 | Gpr6          |
| ENSMUSG00000049721  | 0.00041045 | -3.580230752 | Gal3st1       |
| ENSMUSG00000042846  | 0.00079245 | -3.58139768  | Lrrtm3        |
| ENSMUSG00000032313  | 0.01188729 | -3.592315248 | Tmem266       |
| ENSMUSG00000021998  | 0.01044467 | -3.602233241 | Lcp1          |
| ENSMUSG000000104524 | 0.03600915 | -3.620238625 | Gm37333       |
| ENSMUSG00000050121  | 0.00899775 | -3.642614006 | Opalin        |
| ENSMUSG00000041836  | 0.00040649 | -3.650046924 | Ptpre         |
| ENSMUSG00000039115  | 0.00178269 | -3.651867043 | Itga9         |
| ENSMUSG00000028023  | 0.00219458 | -3.658102538 | Pitx2         |
| ENSMUSG000000106379 | 0.00019681 | -3.668112227 | Lhfp13        |
| ENSMUSG00000040121  | 0.04451359 | -3.672403398 | Rep15         |
| ENSMUSG00000075596  | 0.01649236 | -3.672551819 | B130006D01Rik |
| ENSMUSG00000029832  | 0.01171148 | -3.681428646 | Nfe2l3        |
| ENSMUSG00000073680  | 0.00031923 | -3.691240499 | Tmem88b       |
| ENSMUSG00000032796  | 0.0081218  | -3.697797765 | Lama1         |
| ENSMUSG00000032517  | 0.00235517 | -3.701995706 | Mobp          |
| ENSMUSG00000078235  | 0.01126342 | -3.717142791 | Fam43b        |
| ENSMUSG00000028610  | 0.00022265 | -3.726773402 | Dmrtb1        |
| ENSMUSG00000040552  | 0.00744949 | -3.727900778 | C3ar1         |
| ENSMUSG00000017344  | 0.00039826 | -3.759669334 | Vtn           |
| ENSMUSG00000025314  | 0.00040084 | -3.779941823 | Ptprj         |
| ENSMUSG00000017897  | 0.00224911 | -3.791451188 | Eya2          |
| ENSMUSG00000015829  | 5.7919E-05 | -3.796246383 | Tnr           |
| ENSMUSG00000026347  | 0.00031738 | -3.796410131 | Tmem163       |
| ENSMUSG00000029304  | 0.00080814 | -3.804741063 | Spp1          |
| ENSMUSG00000061082  | 0.02769985 | -3.813788066 | Plac1         |
| ENSMUSG00000048126  | 0.00193789 | -3.824119854 | Col6a3        |
| ENSMUSG00000099924  | 0.03783789 | -3.831755015 | Gm28320       |
| ENSMUSG00000024598  | 0.00071429 | -3.844080849 | Fbn2          |
| ENSMUSG00000026437  | 0.00028679 | -3.876959867 | Cdk18         |
| ENSMUSG00000029334  | 0.00086677 | -3.90434674  | Prkg2         |
| ENSMUSG00000063446  | 0.00014964 | -3.904857259 | Plpp1         |
| ENSMUSG00000026934  | 0.02891573 | -3.910088166 | Lhx3          |
| ENSMUSG00000092210  | 0.00105002 | -3.931614443 | A930009A15Rik |
| ENSMUSG00000023992  | 0.01272183 | -3.935051079 | Trem2         |
| ENSMUSG00000027358  | 0.00744881 | -3.946811485 | Bmp2          |
| ENSMUSG00000045871  | 0.01382109 | -3.946947489 | Slitrk6       |
| ENSMUSG00000029661  | 0.00040649 | -3.9524872   | Col1a2        |
| ENSMUSG00000038457  | 0.00044372 | -3.982834819 | Tmem255b      |
| ENSMUSG00000067879  | 0.00040649 | -3.995481815 | 3110035E14Rik |
| ENSMUSG00000051335  | 0.04991951 | -4.000415659 | Gfod1         |
| ENSMUSG00000040533  | 0.03891515 | -4.043851247 | Matn1         |
| ENSMUSG00000093561  | 0.04577328 | -4.049642644 | Gm20699       |
| ENSMUSG00000000792  | 0.03826061 | -4.065299498 | Slc5a5        |
| ENSMUSG00000034145  | 0.04364854 | -4.082627566 | Tmem63c       |
| ENSMUSG00000038173  | 0.00033492 | -4.132163118 | Enpp6         |
| ENSMUSG000000107352 | 0.03022858 | -4.145171223 | Gm43660       |
| ENSMUSG00000024479  | 0.01863304 | -4.148469577 | Mal2          |
| ENSMUSG00000049577  | 0.030309   | -4.154802104 | Zfpm1         |
| ENSMUSG00000021506  | 0.04687309 | -4.177121047 | Pitx1         |
| ENSMUSG00000093668  | 0.02329507 | -4.180013633 | Pou5f2        |
| ENSMUSG00000031385  | 0.00022941 | -4.198107854 | Plxb3         |
| ENSMUSG00000025189  | 0.00783421 | -4.206585618 | Cnm1          |

|                     |            |              |               |
|---------------------|------------|--------------|---------------|
| ENSMUSG00000006344  | 0.04860037 | -4.207370203 | Ggt5          |
| ENSMUSG00000024935  | 0.00033801 | -4.255545616 | Slc1a1        |
| ENSMUSG00000024395  | 2.5005E-05 | -4.278824379 | Lims2         |
| ENSMUSG000000105380 | 0.02068864 | -4.294512306 | Trav12-4      |
| ENSMUSG00000004266  | 0.01113632 | -4.320051477 | Ptpn6         |
| ENSMUSG00000052613  | 0.00013273 | -4.340269333 | Pcdh15        |
| ENSMUSG000000105740 | 0.03864294 | -4.373484666 | Gm42685       |
| ENSMUSG00000022754  | 0.00245429 | -4.385204743 | Tmem45a       |
| ENSMUSG00000025701  | 0.00618277 | -4.404403938 | Alox5         |
| ENSMUSG00000002007  | 0.00101359 | -4.407068586 | Srpk3         |
| ENSMUSG00000058715  | 0.00671491 | -4.407199046 | Fcer1g        |
| ENSMUSG00000037754  | 2.7812E-05 | -4.458034112 | Ppp1r16b      |
| ENSMUSG00000024647  | 0.00015258 | -4.46296497  | Cbln2         |
| ENSMUSG00000078721  | 0.0160706  | -4.486635962 | Fam205a1      |
| ENSMUSG00000084959  | 0.01633974 | -4.510990961 | 4933407I08Rik |
| ENSMUSG00000036098  | 5.4551E-05 | -4.52998101  | Myrf          |
| ENSMUSG00000026365  | 0.03243804 | -4.537701681 | Cfh           |
| ENSMUSG00000013523  | 9.2733E-06 | -4.542506579 | Bcas1         |
| ENSMUSG00000025650  | 0.00187217 | -4.578023052 | Col7a1        |
| ENSMUSG000000103693 | 0.04924565 | -4.60220735  | Gm37529       |
| ENSMUSG00000062593  | 0.04308083 | -4.622937681 | Lilrb4a       |
| ENSMUSG00000048583  | 0.0006278  | -4.662900374 | Igf2          |
| ENSMUSG00000034310  | 0.00121771 | -4.680783216 | Tmem132d      |
| ENSMUSG00000056966  | 0.00046105 | -4.688792009 | Gjc3          |
| ENSMUSG00000034000  | 0.00033492 | -4.729588898 | Neu4          |
| ENSMUSG00000023945  | 0.00564044 | -4.733492566 | Slc5a7        |
| ENSMUSG00000028339  | 0.02480646 | -4.748213581 | Col15a1       |
| ENSMUSG000000105289 | 0.01520694 | -4.759795451 | Gm43483       |
| ENSMUSG00000065485  | 0.01073947 | -4.773163747 | Mir219a-2     |
| ENSMUSG00000086040  | 0.02283965 | -4.795906005 | Wipf3         |
| ENSMUSG00000021835  | 2.7812E-05 | -4.814584099 | Bmp4          |
| ENSMUSG00000033006  | 9.2733E-06 | -4.846003347 | Sox10         |
| ENSMUSG00000078190  | 0.01566334 | -4.911975236 | Dnm3os        |
| ENSMUSG00000063234  | 0.03826061 | -4.92360469  | Gpr84         |
| ENSMUSG00000102009  | 0.02821594 | -4.967365344 | 4933400F21Rik |
| ENSMUSG00000039883  | 0.00332524 | -4.975055764 | Lrrc17        |
| ENSMUSG00000026574  | 0.02312817 | -4.993606632 | Dpt           |
| ENSMUSG00000052229  | 0.00023797 | -5.012327827 | Gpr17         |
| ENSMUSG00000045394  | 0.00089104 | -5.028858452 | Epcam         |
| ENSMUSG00000035493  | 0.00230942 | -5.036908044 | Tgfb1         |
| ENSMUSG000000108752 | 0.02494615 | -5.080364423 | Gm45191       |
| ENSMUSG00000015950  | 0.04717088 | -5.085465906 | Ncf1          |
| ENSMUSG00000044519  | 5.4018E-05 | -5.1180349   | Zfp488        |
| ENSMUSG00000033579  | 3.7822E-05 | -5.130710591 | Fa2h          |
| ENSMUSG00000028298  | 0.00041045 | -5.207429248 | Cga           |
| ENSMUSG00000029718  | 0.00033801 | -5.237592218 | Pcolce        |
| ENSMUSG00000064293  | 0.01129321 | -5.23887031  | Cntn4         |
| ENSMUSG00000050272  | 0.00022265 | -5.327437138 | Dscam         |
| ENSMUSG00000000982  | 0.02351554 | -5.350395298 | Ccl3          |
| ENSMUSG00000086999  | 0.00313962 | -5.353948526 | Bcas1os2      |
| ENSMUSG00000027857  | 0.00031923 | -5.360762591 | Tshb          |
| ENSMUSG00000027750  | 0.03564966 | -5.401476914 | Postn         |
| ENSMUSG00000109555  | 0.02781703 | -5.430721029 | Gm44891       |
| ENSMUSG00000023828  | 0.02690315 | -5.432537375 | Slc22a3       |
| ENSMUSG00000043903  | 0.00286345 | -5.439199913 | Gm22          |
| ENSMUSG00000040747  | 0.01722102 | -5.46053133  | Cd53          |
| ENSMUSG00000034275  | 2.7812E-05 | -5.491647006 | Igsf9b        |
| ENSMUSG00000076858  | 0.01133599 | -5.579249156 | Trav3-4       |
| ENSMUSG00000036634  | 1.6803E-05 | -5.614190819 | Mag           |
| ENSMUSG00000051212  | 0.01283997 | -5.61646821  | Gpr183        |
| ENSMUSG00000030579  | 0.00224529 | -5.624168075 | Tyrobp        |
| ENSMUSG00000086970  | 0.00267875 | -5.673684511 | Bcas1os1      |
| ENSMUSG00000024529  | 0.00509774 | -5.745625653 | Lox           |
| ENSMUSG00000027524  | 0.00757542 | -5.790971842 | Edn3          |
| ENSMUSG00000026548  | 0.02837062 | -5.851163952 | Slamf9        |
| ENSMUSG00000049723  | 0.0381654  | -5.854943096 | Mmp12         |
| ENSMUSG00000022548  | 0.00023797 | -5.883066611 | Apod          |
| ENSMUSG00000103225  | 0.00194369 | -5.885661471 | Gm37731       |
| ENSMUSG00000036896  | 0.00068656 | -5.944276675 | C1qc          |
| ENSMUSG00000026751  | 0.00361286 | -5.957235946 | Nr5a1         |
| ENSMUSG00000044811  | 0.01933438 | -5.957645888 | Cd300c2       |
| ENSMUSG00000036887  | 0.00047616 | -5.994177654 | C1qa          |
| ENSMUSG00000050473  | 0.04135785 | -6.018070549 | Slc35d3       |
| ENSMUSG00000037625  | 0.00041087 | -6.034375119 | Cldn11        |
| ENSMUSG00000031775  | 0.00048959 | -6.076874746 | Plip          |

|                     |            |              |               |
|---------------------|------------|--------------|---------------|
| ENSMUSG00000048163  | 0.01439482 | -6.11339564  | Selplg        |
| ENSMUSG00000038642  | 0.00047616 | -6.278041524 | Cts           |
| ENSMUSG00000036905  | 0.00058939 | -6.344618685 | C1qb          |
| ENSMUSG00000032502  | 0.02558849 | -6.419753378 | Stac          |
| ENSMUSG00000029255  | 0.011359   | -6.479391773 | Gnrhr         |
| ENSMUSG00000032419  | 0.00904883 | -6.648471703 | Tbx18         |
| ENSMUSG00000028581  | 0.00101046 | -6.714185765 | Laptm5        |
| ENSMUSG00000003309  | 0.02198359 | -6.71776727  | Ap1m2         |
| ENSMUSG00000036938  | 0.00818374 | -6.777860849 | Try5          |
| ENSMUSG00000024679  | 0.0497418  | -6.824381254 | Ms4a6d        |
| ENSMUSG00000026840  | 0.00248102 | -6.872404274 | Lamc3         |
| ENSMUSG00000022696  | 0.00799339 | -7.064620515 | Sid1          |
| ENSMUSG00000013584  | 0.00105085 | -7.315080315 | Aldh1a2       |
| ENSMUSG00000051367  | 0.00849859 | -7.325189865 | Six1          |
| ENSMUSG000000103192 | 0.01054015 | -7.405488344 | Gm37645       |
| ENSMUSG00000024397  | 0.00474034 | -7.442599517 | Aif1          |
| ENSMUSG00000052160  | 0.00987741 | -7.512127924 | Pld4          |
| ENSMUSG00000046805  | 0.01179044 | -7.620518654 | Mpeg1         |
| ENSMUSG00000021423  | 0.00996123 | -7.626870095 | Ly86          |
| ENSMUSG00000097736  | 2.7812E-05 | -7.844588953 | 9530059O14Rik |
| ENSMUSG00000001281  | 0.00224529 | -7.985495888 | Itgb7         |
| ENSMUSG00000061353  | 0.0003418  | -8.019965941 | Cxcl12        |
| ENSMUSG00000079293  | 0.00650062 | -8.246987381 | Clec7a        |
| ENSMUSG00000028111  | 0.00361385 | -8.6138016   | Ctsk          |
| ENSMUSG00000035352  | 0.0050662  | -8.883630704 | Ccl12         |
| ENSMUSG00000000682  | 0.00192927 | -8.884479886 | Cd52          |
| ENSMUSG00000009687  | 0.00115906 | -8.916949089 | Fxyd5         |
| ENSMUSG00000001506  | 2.3795E-05 | -9.224667697 | Col1a1        |
| ENSMUSG00000040026  | 0.00368259 | -9.342744639 | Saa3          |
| ENSMUSG00000026043  | 0.00014625 | -9.546321667 | Col3a1        |
| ENSMUSG00000094832  | 0.00287694 | -9.689648871 | Gm21846       |
| ENSMUSG00000002111  | 0.00346857 | -10.01483743 | Spi1          |
| ENSMUSG00000059498  | 0.00255309 | -10.28476112 | Fcgr3         |
| ENSMUSG00000046610  | 0.00564044 | -11.09115421 | Oacyl         |
| ENSMUSG00000054675  | 0.00282479 | -11.31513767 | Tmem119       |
| ENSMUSG00000020660  | 2.7812E-05 | -11.5091213  | Pomc          |
| ENSMUSG00000030108  | 0.005783   | -11.76095604 | Slc6a13       |
| ENSMUSG00000015340  | 0.00230942 | -12.08649151 | Cybb          |
| ENSMUSG00000036446  | 0.00369366 | -13.10987037 | Lum           |
| ENSMUSG00000019929  | 2.3795E-05 | -13.35463001 | Dcn           |
| ENSMUSG00000024621  | 0.002961   | -15.47232932 | Csf1r         |
| ENSMUSG00000027315  | 0.001669   | -16.3471698  | Spint1        |
| ENSMUSG00000052336  | 0.00041045 | -17.29298284 | Cx3cr1        |

**Table S3.** TFs enriched in Hcrt and Mch cells. Gene ontology analysis showed that they mainly have TF and DNA binding activity.

| Gene name | Gene ontology                                                                                                                                  | Fold change | Gene name | Gene ontology                                                                                                                                                                                                                                                                        | Fold change |
|-----------|------------------------------------------------------------------------------------------------------------------------------------------------|-------------|-----------|--------------------------------------------------------------------------------------------------------------------------------------------------------------------------------------------------------------------------------------------------------------------------------------|-------------|
| Pir       | transcription cofactor activity                                                                                                                | 2.61        | Sox14     | sequence specific DNA binding and chromatin binding                                                                                                                                                                                                                                  | 52.68       |
| Gbx2      | transcription factor activity, sequence-specific DNA binding                                                                                   | 2.91        | Prrx1     | sequence-specific DNA binding and HMG box domain binding                                                                                                                                                                                                                             | 2.56        |
| Nod1      | transcription cofactor activity                                                                                                                | 2.30        | Ldb2      | enzyme binding and transcription factor activity, transcription factor binding<br>RNA polymerase II transcription factor activity, sequence-specific DNA binding and transcriptional activator activity, RNA polymerase II transcription regulatory region sequence-specific binding | 2.61        |
| Ldb2      | enzyme binding and transcription factor activity, transcription factor binding                                                                 | 2.10        | Plagl1    | transcriptional activator activity, RNA polymerase II distal enhancer sequence-specific binding                                                                                                                                                                                      | 3.20        |
| Tfcp2l1   | transcription factor activity, sequence-specific DNA binding and transcription corepressor activity                                            | 2.93        | Six6      | nucleic acid binding and RNA polymerase II transcription factor activity, sequence-specific DNA binding                                                                                                                                                                              | 6.21        |
| Ahr       | transcription factor activity, sequence-specific DNA binding and protein heterodimerization activity                                           | 2.39        | Zim1      | nucleic acid binding and RNA polymerase II transcription factor activity, sequence-specific DNA binding                                                                                                                                                                              | 6.92        |
| Ptrf      | regulation of transcription, DNA-templated                                                                                                     | 2.03        | Peg3      | transcription factor activity, sequence-specific DNA binding and sequence-specific DNA binding                                                                                                                                                                                       | 2.61        |
| Nfe2l2    | transcription factor activity, sequence-specific DNA binding and protein domain specific binding                                               | 2.03        | Nkx6-2    | transcription factor activity, sequence-specific DNA binding and sequence-specific DNA binding                                                                                                                                                                                       | 2.64        |
| Tcea3     | nucleic acid binding                                                                                                                           | 2.95        | Thrb      | transcription factor activity, sequence-specific DNA binding and enzyme binding                                                                                                                                                                                                      | 3.65        |
| Rbm43     | nucleic acid binding and nucleotide binding                                                                                                    | 2.14        | Nr2f2     | transcription factor activity, sequence-specific DNA binding and sequence-specific DNA binding                                                                                                                                                                                       | 3.01        |
| Msx1      | sequence-specific DNA binding and p53 binding                                                                                                  | 2.04        | Rorc      | transcription factor activity, sequence-specific DNA binding and steroid hormone receptor activity                                                                                                                                                                                   | 3.16        |
| Ocln      | structural molecule activity and S-adenosylmethionine-dependent methyltransferase activity                                                     | 2.43        | Pgr       | transcription factor activity, sequence-specific DNA binding and receptor binding                                                                                                                                                                                                    | 7.35        |
| Msx2      | sequence-specific DNA binding and RNA polymerase II core promoter proximal region sequence-specific DNA binding                                | 5.50        | Zfp92     | nucleic acid binding<br>transcription factor activity, sequence-specific DNA binding and protein heterodimerization activity                                                                                                                                                         | 44.17       |
| Nlrp6     | sequence-specific DNA binding transcription factor activity, transcription cofactor activity                                                   | 2.88        | Ahr       | transcription factor activity, sequence-specific DNA binding and sequence-specific DNA binding                                                                                                                                                                                       | 3.58        |
| Rfx2      | transcription factor activity, sequence-specific DNA binding and RNA polymerase II core promoter proximal region sequence-specific DNA binding | 2.15        | Atf3      | transcription factor activity, sequence-specific DNA binding and sequence-specific DNA binding                                                                                                                                                                                       | 2.15        |
| Ccdc108   | sequence-specific DNA binding transcription factor activity                                                                                    | 2.09        | Hopx      | DNA binding transcription factor activity, Protein binding                                                                                                                                                                                                                           | 2.58        |
| Zmynd10   | sequence-specific DNA binding transcription factor activity                                                                                    | 2.01        | Tbx3      | transcription factor activity, sequence-specific DNA binding and RNA polymerase II core promoter proximal region sequence-specific DNA binding                                                                                                                                       | 4.39        |
| Lmx1a     | regulation of transcription from RNA polymerase II promoter                                                                                    | 2.26        | Glis3     | transcription factor activity, sequence-specific DNA binding and transcriptional activator activity, RNA polymerase II core promoter proximal region sequence-specific binding                                                                                                       | 3.34        |

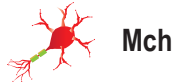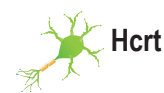

**Table S4.** Genes and pathways dysregulated between Hcrt and Mch cell types.

| Gene ID | GO (bp)                                                                                                                                                        | pathways                                                                                                                                                                   |
|---------|----------------------------------------------------------------------------------------------------------------------------------------------------------------|----------------------------------------------------------------------------------------------------------------------------------------------------------------------------|
| Ache    | acetylcholine catabolic process, regulation of receptor recycling , osteoblast development, DNA replication                                                    | Cholinergic synapse,<br>Glycerophospholipid metabolism                                                                                                                     |
| Baiap3  | G-protein coupled receptor signaling pathway, neurotransmitter secretion                                                                                       | Transcriptional misregulation in cancer                                                                                                                                    |
| Car10   |                                                                                                                                                                |                                                                                                                                                                            |
| Car3    | one-carbon metabolic process, response to oxidative stress, bicarbonate transport, response to ethanol                                                         | Nitrogen metabolism                                                                                                                                                        |
| Cldn9   | viral entry into host cell, viral process, calcium-independent cell-cell adhesion via plasma membrane cell-adhesion molecules, cell-cell junction organization | Cell adhesion molecules, Hepatitis C,<br>Leukocyte transendothelial migration,<br>Tight junction                                                                           |
| Epcam   | negative regulation of apoptotic process, positive regulation of cell proliferation, positive regulation of transcription from RNA polymerase II promoter      |                                                                                                                                                                            |
| Mal2    | myelination, transcytosis, membrane raft polarization, protein localization                                                                                    |                                                                                                                                                                            |
| Ndr1    | peripheral nervous system myelin maintenance, response to metal ion , negative regulation of cell proliferation ,                                              |                                                                                                                                                                            |
| Nefl    | MAPK cascade, anterograde axonal transport , microtubule cytoskeleton organization , response to toxic substance                                               | Amyotrophic lateral sclerosis (ALS)                                                                                                                                        |
| Pclo    | cAMP-mediated signaling, regulation of exocytosis, synaptic vesicle exocytosis, synapse assembly, cytoskeleton organization                                    | Insulin secretion<br>Adrenergic signaling in cardiomyocytes,<br>AMPK signaling pathway, Chagas disease<br>(American trypanosomiasis),<br>Dopaminergic synapse, Hepatitis C |
| Ppp2r2c | peptidyl-serine dephosphorylation, regulation of catalytic activity, developmental process, mitotic cell cycle                                                 |                                                                                                                                                                            |
| Resp18  | in utero embryonic development                                                                                                                                 |                                                                                                                                                                            |
| Rian    |                                                                                                                                                                |                                                                                                                                                                            |
| Scg2    | inflammatory response, positive regulation of endothelial cell proliferation, angiogenesis, MAPK cascade                                                       |                                                                                                                                                                            |
| Slc12a5 | cellular ion homeostasis, chloride transport, potassium ion transport, ion transport                                                                           | GABAergic synapse<br>Glutamatergic synapse, Nicotine<br>addiction, Retrograde endocannabinoid<br>signaling, Synaptic vesicle cycle                                         |
| Slc17a6 | transmembrane transport, neurotransmitter transport, sodium ion transport, ion transport                                                                       |                                                                                                                                                                            |
| Shhg11  |                                                                                                                                                                |                                                                                                                                                                            |
| Spint1  | positive regulation of glial cell differentiation, extracellular matrix organization, negative regulation of endopeptidase activity, neural tube closure       | Transcriptional misregulation in cancer                                                                                                                                    |
| Tmem130 |                                                                                                                                                                | Autoimmune thyroid disease,<br>Neuroactive ligand-receptor interaction,<br>Regulation of lipolysis in adipocytes,<br>Thyroid hormone synthesis                             |
| Tshb    | peptide hormone processing, hormone-mediated signaling pathway, anatomical structure morphogenesis, G-protein coupled receptor signaling pathway               | Adipocytokine signaling pathway,<br>Melanogenesis                                                                                                                          |
| Pomc    | generation of precursor metabolites and energy, signal transduction, neuropeptide signaling pathway                                                            |                                                                                                                                                                            |

Table S5. Material used for inducing *Hcrt* gene expression.

|            |    |                              |                  |      |    |                                     |                    |
|------------|----|------------------------------|------------------|------|----|-------------------------------------|--------------------|
| From day 2 | 1  | bFGF, FGF12,FGF13,FGF15,FGF8 | 10ng /ml         | day3 | 17 | CHIR                                | 3uM                |
| From day 3 | 2  | CTRL (just gfCDM)            |                  |      | 18 | NGF                                 | 50ng/ml            |
|            | 3  | bFGF, FGF12,FGF13,FGF15,FGF8 | 10ng /ml         |      | 19 | RA                                  | 100ng/ml           |
|            | 4  | BMP7                         | 10ng /ml         |      | 20 | inhibitor of EGF receptor<br>AG1478 | 2.5ug/ml           |
|            | 5  | BMP4                         | 10ng /ml         |      | 21 | JNK Inhibitor II                    | 10uM               |
|            | 6  | BMP7+bFGF                    | 10ng /ml         |      | 22 | SB 203580                           | 10uM               |
|            | 7  | VC +a-tocoferol              | 50ug/ml<br>100uM |      | 23 | H-89 dihydrochloride hydrate        | 10uM               |
|            | 8  | VC                           | 50ug/ml          |      | 24 | LY294002                            | 10uM               |
|            | 9  | igf-1                        | 10ng/ml          |      | 25 | Shh                                 | 5nM                |
|            | 10 | Orexin                       | 0.01 uM          |      | 26 | RA, bFGF,BMP7                       | 100ng,50ng,20ng/ml |
|            | 11 | Histamin                     | 100ng/ml         | day4 | 27 | FGF12,FGF13,FGF15                   | 20ng/ml            |
|            | 12 | Mannac                       | 1mM              |      | 28 | FGF12                               | 20ng/ml            |
|            | 13 | U0126                        | 10uM             |      | 29 | FGF12,bFGF,BMP7, BMP4               | 20ngml             |
|            | 14 | Erlotinib Hydrochloride      | 1ug/ml           |      | 30 | FGF12, l-Glutamin, l-Cys            | 20ng, 30uM, 30uM   |
|            | 15 | EGF                          | 20ng/ml          |      | 31 | KSR method                          |                    |
|            | 16 | PD                           | 1uM              | day3 | 32 | KSR + BMP7 from day 3               |                    |

**Table S6.** Pathways in which TFs upregulated in Hcrt and Mch cells are involved.

|    | <b>Hcrt pathways</b>                 |   | <b>Mch pathways</b>                   |
|----|--------------------------------------|---|---------------------------------------|
| 1  | Thyroid hormone signaling pathway    | a | NOD-like receptor signaling pathway   |
| 2  | Th17 cell differentiation            | b | Shigellosis                           |
| 3  | Circadian rhythm                     | c | Pertussis                             |
| 4  | HTLV-I infection                     | d | Pathogenic Escherichia coli infection |
| 5  | NF-kappa B signaling pathway         | e | Hepatitis C                           |
| 6  | Cellular senescence                  | f | Cellular senescence                   |
| 7  | Hepatitis C                          | g | HTLV-I infection                      |
| 8  | Maturity onset diabetes of the young | h | Circadian rhythm                      |
| 9  | Influenza A                          | i | Necroptosis                           |
| 10 | Necroptosis                          |   |                                       |
| 11 | IL-17 signaling pathway              |   |                                       |
| 12 | TNF signaling pathway                |   |                                       |
| 13 | Lysosome                             |   |                                       |



**Table S7.** The sequence of morpholinos used in this study. For Peg3 we used its ortholog in zebrafish (si:ch211-266d19.4, Zfp271) based on Genecards and Ensemble databases.

Morpholinos used to screen TFs enriched in Hcrt cells

| Number | Name       | Séquence (5'--> 3')       | Mw   | Quantity (nmol) | stock (ng/nl) | Injection (ng) | Volume (nl) |
|--------|------------|---------------------------|------|-----------------|---------------|----------------|-------------|
| 1      | ahr1a_ATG  | ATCTCCAAAGAAACAGATTCGTGGT | 8476 | 300             | 1,25          | 1,25 / 2,5 / 5 | 1 / 2 / 4   |
| 2      | ldb2b_ATG  | TCATGGTTTCTGTTACCGACAGCGC | 8426 | 300             | 1,25          | 1,25 / 2,5 / 5 | 1 / 2 / 4   |
| 3      | nkx6.2_ATG | CCATCTGTCCCACCGCTAACATTGG | 8340 | 300             | 1,25          | 1,25 / 2,5 / 5 | 1 / 2 / 4   |
| 4      | nr2f2_ATG  | CCTCTCCACACTACCATTGCCATAT | 8259 | 300             | 1,25          | 1,25 / 2,5 / 5 | 1 / 2 / 4   |
| 5      | Peg3_ATG   | CTCTTCAGAAAATCATCATGCACGT | 8387 | 300             | 1,25          | 1,25 / 2,5 / 5 | 1 / 2 / 4   |
| 6      | pgr_ATG    | GTGTTCACCGTGTCCATTCTAATGT | 8416 | 300             | 1,25          | 1,25 / 2,5 / 5 | 1 / 2 / 4   |
| 7      | prrx1a_ATG | ACATGAGCATAGCTGGAAGTCATGA | 8541 | 300             | 1,25          | 1,25 / 2,5 / 5 | 1 / 2 / 4   |
| 8      | six6a_ATG  | TGTAATGTCTCTCCTTTGGTCCT   | 8358 | 300             | 1,25          | 1,25 / 2,5 / 5 | 1 / 2 / 4   |
| 9      | tbx3a_ATG  | CTCTCATCGGGAAGTCCAGATTGCA | 8444 | 300             | 1,25          | 1,25 / 2,5 / 5 | 1 / 2 / 4   |
| 10     | thrb_ATG   | CATTTGTCTGCTTGTCTGACATAC  | 8376 | 300             | 1,25          | 1,25 / 2,5 / 5 | 1 / 2 / 4   |

Morpholinos used to screen TFs enriched in Mch cells

| Number | Name      | Séquence (5'--> 3')       | Mw   | Quantity (nmol) | stock (ng/nl) | Injection (ng)     | Volume (nl)   |
|--------|-----------|---------------------------|------|-----------------|---------------|--------------------|---------------|
| 5      | Peg3_ATG  | CTCTTCAGAAAATCATCATGCACGT | 8387 | 300             | 1,25          | 1,25 / 2,5 / 5     | 1 / 2 / 4     |
| 11     | Gbx2_ATG  | GTGTGCTGAAAGCTGCACTCATAT  | 8144 | 300             | 1,25          | 1,25 / 2,5 / 5     | 1 / 2 / 4     |
| 12     | Lmx1a_ATG | GGCACATCATTATCCAGAGATCAT  | 8452 | 300             | 1,25          | 1,25 / 2,5 / 5     | 1 / 2 / 4     |
| 13     | Msx2a_ATG | CATTAACCTGTAACGCGCTCGCTC  | 8364 | 300             | 1,25          | 1,25 / 2,5 / 5     | 1 / 2 / 4     |
| 14     | Rfx2_ATG  | CATCGTTTCTCCTCAGCCTTGTG   | 7682 | 300             | 1,25          | 0,6/1,25 / 2,5 / 5 | 0,5/1 / 2 / 4 |

## References

1. Martin M (2011) Cutadapt removes adapter sequences from high-throughput sequencing reads. *EMBnet. journal* 17(1):pp. 10-12.
2. Davis MP, van Dongen S, Abreu-Goodger C, Bartonicek N, & Enright AJ (2013) Kraken: a set of tools for quality control and analysis of high-throughput sequence data. *Methods* 63(1):41-49.
3. Dobin A, *et al.* (2013) STAR: ultrafast universal RNA-seq aligner. *Bioinformatics* 29(1):15-21.
4. Anders S, Pyl PT, & Huber W (2015) HTSeq--a Python framework to work with high-throughput sequencing data. *Bioinformatics* 31(2):166-169.
5. Wang L, Wang S, & Li W (2012) RSeQC: quality control of RNA-seq experiments. *Bioinformatics* 28(16):2184-2185.
6. Robinson MD, McCarthy DJ, & Smyth GK (2010) edgeR: a Bioconductor package for differential expression analysis of digital gene expression data. *Bioinformatics* 26(1):139-140.
7. Ritchie ME, *et al.* (2015) limma powers differential expression analyses for RNA-sequencing and microarray studies. *Nucleic Acids Res* 43(7):e47.
8. Takahashi K, Okita K, Nakagawa M, & Yamanaka S (2007) Induction of pluripotent stem cells from fibroblast cultures. *Nat Protoc* 2(12):3081-3089.
9. Wataya T, *et al.* (2008) Minimization of exogenous signals in ES cell culture induces rostral hypothalamic differentiation. *Proc Natl Acad Sci U S A* 105(33):11796-11801.
10. Barde I, Salmon P, & Trono D (2010) Production and titration of lentiviral vectors. *Curr Protoc Neurosci* Chapter 4:Unit 4 21.
11. Kimmel CB, Ballard WW, Kimmel SR, Ullmann B, & Schilling TF (1995) Stages of embryonic development of the zebrafish. *Developmental dynamics : an official publication of the American Association of Anatomists* 203(3):253-310.
12. Szklarczyk D, *et al.* (2015) STRING v10: protein-protein interaction networks, integrated over the tree of life. *Nucleic Acids Res* 43(Database issue):D447-452.
13. Han H, *et al.* (2018) TRRUST v2: an expanded reference database of human and mouse transcriptional regulatory interactions. *Nucleic Acids Res* 46(D1):D380-D386.
14. Chatr-Aryamontri A, *et al.* (2017) The BioGRID interaction database: 2017 update. *Nucleic Acids Res* 45(D1):D369-D379.
